# Supplementary material for: Breast cancer brain metastases genomic profiling identifies alterations targetable by immune-checkpoint and PARP inhibitors
Source: NPJ Precis Oncol. 2024 Dec 20;8:282. doi: 10.1038/s41698-024-00761-0 (PMC11662007; doi:10.1038/s41698-024-00761-0)
Supplement: Supplementary file 2 — Supplementary Data 1 [file 41698_2024_761_MOESM2_ESM.xlsx]

## Sheet: Prevalence all
Prevalence all: Complete dataset of genes analysed by CGS (Foundation Medicine)
Gene	# local	# var local	% var local	# brain met	# var brain met	% var brain met	# other met	# var other met	% var other met	OR brain met vs local	pval brain met vs local	OR brain met vs other met	pval brain met vs other met	OR other met vs local	pval other met vs local
ERBB2	11988	1392	0.116116	822	202	0.245742	15516	1716	0.110596	2.48006	5.56568e-23	2.62012	5.89991e-26	0.946544	0.155277
TP53	11988	7017	0.585335	822	590	0.717762	15516	6833	0.440384	1.80159	2.92814e-14	3.23164	2.41715e-55	0.557486	5.15749e-126
CDH1	11988	1135	0.094678	822	35	0.0425791	15516	2183	0.140693	0.425253	5.84992e-08	0.271624	1.83158e-19	1.5656	1.03687e-31
SOX2	11988	115	0.00959293	822	28	0.0340633	15516	179	0.0115365	3.64083	9.23102e-08	3.02152	1.77555e-06	1.20497	0.124447
PRKCI	11988	185	0.0154321	822	36	0.0437956	15516	202	0.0130188	2.92214	1.97913e-07	3.4723	3.10459e-09	0.841557	0.0984877
CDK12	11988	161	0.0134301	822	33	0.040146	15516	178	0.011472	3.07246	2.27687e-07	3.60401	6.03048e-09	0.852511	0.151959
HNF1A	11988	18	0.0015015	822	10	0.0121655	15516	17	0.00109564	8.18966	5.08696e-06	11.2279	3.79868e-07	0.729402	0.395224
VEGFA	11988	219	0.0182683	822	36	0.0437956	15516	183	0.0117943	2.46136	7.09445e-06	3.83757	3.00018e-10	0.641386	1.22426e-05
CCND3	11988	234	0.0195195	822	37	0.0450122	15516	192	0.0123743	2.36756	1.2928e-05	3.76186	2.81596e-10	0.62936	2.64644e-06
BRCA1	11988	512	0.0427094	822	64	0.0778589	15516	497	0.0320315	1.89248	1.64032e-05	2.5515	7.45708e-10	0.741713	3.61889e-06
TERC	11988	224	0.0186854	822	35	0.0425791	15516	245	0.0157902	2.33561	2.7629e-05	2.77201	6.41193e-07	0.842569	0.0671254
PIK3CB	11988	78	0.00650651	822	18	0.0218978	15516	96	0.00618716	3.41848	3.33445e-05	3.59608	1.4879e-05	0.950614	0.75935
AKT2	11988	229	0.0191024	822	34	0.0413625	15516	218	0.01405	2.21558	9.92476e-05	3.02783	1.50846e-07	0.73174	0.00106802
CD274	11988	188	0.0156823	822	29	0.0352798	15516	174	0.0112142	2.29535	0.000199124	3.22446	3.67559e-07	0.711855	0.00135394
ESR1	11988	442	0.0368702	822	53	0.0644769	15516	3220	0.207528	1.80036	0.00023301	0.263183	7.00084e-29	6.84071	0
PDCD1LG2	11988	183	0.0152653	822	28	0.0340633	15516	168	0.0108275	2.27485	0.000288599	3.22166	5.8265e-07	0.70611	0.00136225
JAK2	11988	218	0.0181849	822	31	0.0377129	15516	210	0.0135344	2.11595	0.000352785	2.85646	1.50812e-06	0.74076	0.00228805
FGFR4	11988	64	0.00533867	822	14	0.0170316	15516	166	0.0106986	3.22819	0.000391795	1.6022	0.118452	2.01485	9.03616e-07
CDKN2A	11988	827	0.0689857	822	85	0.103406	15516	1076	0.0693478	1.5565	0.000430712	1.54777	0.000467723	1.00564	0.923657
ERBB4	11988	66	0.00550551	822	14	0.0170316	15516	114	0.00734725	3.12984	0.000512337	2.34093	0.00638572	1.337	0.0700432
FGF12	11988	116	0.00967634	822	20	0.0243309	15516	192	0.0123743	2.55224	0.000528415	1.99034	0.00646003	1.28232	0.0374114
CDKN2B	11988	593	0.0494661	822	64	0.0778589	15516	772	0.0497551	1.62245	0.000756152	1.61253	0.000811568	1.00615	0.933071
FAS	11988	137	0.0114281	822	22	0.026764	15516	151	0.00973189	2.37885	0.000814288	2.79826	5.81356e-05	0.850117	0.188725
ARID1A	11988	559	0.04663	822	60	0.0729927	15516	1148	0.0739881	1.60988	0.00131717	0.985487	1	1.63359	3.92877e-21
EPHB1	11988	49	0.00408742	822	11	0.013382	15516	65	0.00418922	3.30479	0.00134295	3.22415	0.00140358	1.02501	0.924844
PDGFRA	11988	119	0.00992659	822	19	0.0231144	15516	107	0.00689611	2.35996	0.00138856	3.40744	1.7083e-05	0.69259	0.0069314
MYC	11988	2533	0.211295	822	213	0.259124	15516	2670	0.17208	1.30554	0.00154501	1.68275	1.15419e-09	0.775836	2.35061e-16
FGF10	11988	84	0.00700701	822	15	0.0182482	15516	142	0.00915184	2.63409	0.00154531	2.01241	0.0155692	1.30893	0.0510348
MSH6	11988	76	0.00633967	822	14	0.0170316	15516	100	0.00644496	2.71574	0.0016945	2.67109	0.00173706	1.01672	0.939333
IKZF1	11988	10	0.000834168	822	5	0.00608273	15516	21	0.00135344	7.33048	0.00187793	4.51565	0.00867197	1.62335	0.276677
BARD1	11988	61	0.00508842	822	12	0.0145985	15516	50	0.00322248	2.89666	0.00220143	4.58252	5.12787e-05	0.632111	0.0164977
KIT	11988	149	0.0124291	822	22	0.026764	15516	119	0.0076695	2.18505	0.00229831	3.55813	2.12054e-06	0.614101	8.97214e-05
RAD51B	11988	53	0.00442109	822	11	0.013382	15516	64	0.00412477	3.05435	0.00230698	3.27474	0.00125633	0.9327	0.709716
ROS1	11988	121	0.0100934	822	19	0.0231144	15516	137	0.0088296	2.32056	0.00247351	2.65611	0.000319181	0.873671	0.284238
ATR	11988	80	0.00667334	822	14	0.0170316	15516	141	0.00908739	2.57908	0.00257765	1.88935	0.0385769	1.36506	0.0291077
KDR	11988	123	0.0102603	822	19	0.0231144	15516	110	0.00708946	2.28245	0.00264558	3.31387	2.40023e-05	0.688756	0.00523021
MYCN	11988	72	0.00600601	822	13	0.0158151	15516	85	0.00547822	2.65946	0.0028511	2.91723	0.00123425	0.911639	0.572943
NF1	11988	712	0.0593927	822	71	0.0863747	15516	1058	0.0681877	1.49725	0.00320854	1.29194	0.0481237	1.15892	0.0031893
PALB2	11988	158	0.0131798	822	22	0.026764	15516	202	0.0130188	2.05902	0.00322097	2.08483	0.00287033	0.987621	0.914874
GNAS	11988	645	0.0538038	822	65	0.0790754	15516	966	0.0622583	1.51003	0.00343983	1.29331	0.0556929	1.16757	0.00315163
ARFRP1	11988	364	0.0303637	822	41	0.0498783	15516	624	0.0402166	1.67644	0.00367872	1.25286	0.173816	1.33809	1.35198e-05
IRS2	11988	170	0.0141808	822	23	0.0279805	15516	183	0.0117943	2.00113	0.00425288	2.41189	0.000311752	0.829696	0.0839831
NTRK1	11988	250	0.0208542	822	30	0.0364964	15516	254	0.0163702	1.77848	0.00612235	2.27601	0.000153055	0.781405	0.00648945
KEL	11988	98	0.00817484	822	15	0.0182482	15516	142	0.00915184	2.25514	0.00619276	2.01241	0.0155692	1.12062	0.396224
EP300	11988	118	0.00984318	822	17	0.0206813	15516	126	0.00812065	2.12433	0.00702791	2.57941	0.000853105	0.82357	0.136073
ETV6	11988	91	0.00759092	822	14	0.0170316	15516	65	0.00418922	2.26523	0.00800533	4.1187	3.51059e-05	0.549988	0.000246657
FANCC	11988	55	0.00458792	822	10	0.0121655	15516	70	0.00451147	2.67197	0.00805055	2.71745	0.00667532	0.983261	0.928224
SOX9	11988	55	0.00458792	822	10	0.0121655	15516	88	0.00567156	2.67197	0.00805055	2.15909	0.031732	1.23754	0.236737
RICTOR	11988	160	0.0133467	822	21	0.0255474	15516	209	0.01347	1.93811	0.00840663	1.92013	0.00873219	1.00936	0.957875
POLE	11988	5	0.000417084	822	3	0.00364964	15516	13	0.000837845	8.77875	0.0115524	4.36827	0.0435307	2.00966	0.235533
ACVR1B	11988	59	0.00492159	822	10	0.0121655	15516	63	0.00406032	2.48998	0.0121565	3.02076	0.0034488	0.82429	0.314329
SMO	11988	11	0.000917584	822	4	0.00486618	15516	11	0.000708946	5.32429	0.012995	6.89264	0.00556169	0.77246	0.668088
NOTCH1	11988	309	0.0257758	822	34	0.0413625	15516	281	0.0181103	1.6308	0.0133112	2.33932	3.53306e-05	0.697126	1.49506e-05
BCORL1	11988	60	0.00500501	822	10	0.0121655	15516	80	0.00515597	2.44828	0.0133936	2.37623	0.0148414	1.03032	0.931953
PTEN	11988	1621	0.135219	822	137	0.166667	15516	1817	0.117105	1.27909	0.0136849	1.50787	4.26686e-05	0.848274	7.21783e-06
TERT	11988	177	0.0147648	822	4	0.00486618	15516	164	0.0105697	0.326302	0.014055	0.457749	0.151964	0.71284	0.00205585
CDK6	11988	149	0.0124291	822	19	0.0231144	15516	167	0.0107631	1.88004	0.0159464	2.17471	0.00337083	0.8645	0.209474
MAP2K4	11988	489	0.0407908	822	48	0.0583942	15516	892	0.057489	1.45832	0.0189874	1.01672	0.87794	1.43433	2.41197e-10
RAD51D	11988	20	0.00166834	822	5	0.00608273	15516	33	0.00212684	3.66218	0.0195028	2.87137	0.0404423	1.27541	0.409304
CCNE1	11988	577	0.0481315	822	55	0.06691	15516	451	0.0290668	1.41813	0.0195616	2.3953	7.03487e-08	0.592046	2.14829e-16
TNFAIP3	11988	28	0.00233567	822	6	0.00729927	15516	28	0.00180459	3.14076	0.0196797	4.06723	0.00639612	0.772211	0.347421
TSC2	11988	92	0.00767434	822	13	0.0158151	15516	127	0.0081851	2.07782	0.0242791	1.94716	0.0302235	1.0671	0.681589
AKT1	11988	518	0.0432099	822	22	0.026764	15516	742	0.0478216	0.608929	0.0243233	0.547554	0.00382004	1.11209	0.0713955
MAP2K1	11988	39	0.00325325	822	7	0.00851582	15516	57	0.00367363	2.63152	0.0261605	2.32942	0.0411247	1.12969	0.606795
ZNF217	11988	697	0.0581415	822	64	0.0778589	15516	1068	0.0688322	1.36776	0.0265736	1.14221	0.323457	1.19747	0.000350945
JAK1	11988	22	0.00183517	822	5	0.00608273	15516	15	0.000966744	3.3287	0.0266724	6.32436	0.00262341	0.52633	0.0667984
RBM10	11988	22	0.00183517	822	5	0.00608273	15516	58	0.00373808	3.3287	0.0266724	1.63107	0.248266	2.0408	0.00445438
FGF14	11988	65	0.00542209	822	10	0.0121655	15516	81	0.00522042	2.259	0.0278492	2.34674	0.0249447	0.96261	0.867177
PTPN11	11988	15	0.00125125	822	4	0.00486618	15516	57	0.00367363	3.90318	0.0301048	1.32621	0.549581	2.9431	6.75348e-05
ASXL1	11988	98	0.00817484	822	13	0.0158151	15516	157	0.0101186	1.94962	0.030668	1.57202	0.113261	1.2402	0.0992209
AURKA	11988	466	0.0388722	822	45	0.0547445	15516	762	0.0491106	1.43197	0.0333904	1.12136	0.457066	1.27699	4.23302e-05
CBFB	11988	157	0.0130964	822	4	0.00486618	15516	268	0.0172725	0.368492	0.0350113	0.278218	0.00308493	1.32447	0.00571568
PIK3R1	11988	435	0.0362863	822	42	0.0510949	15516	418	0.0269399	1.43008	0.0357048	1.9449	0.000195925	0.735296	1.12599e-05
DIS3	11988	3	0.00025025	822	2	0.00243309	15516	13	0.000837845	9.7439	0.0361111	2.90863	0.172588	3.35	0.0740632
CUL4A	11988	151	0.0125959	822	18	0.0218978	15516	148	0.00953854	1.75502	0.037481	2.32473	0.00195276	0.754934	0.016183
ALK	11988	43	0.00358692	822	7	0.00851582	15516	68	0.00438257	2.38593	0.0392224	1.95121	0.103275	1.2228	0.337801
QKI	11988	34	0.00283617	822	6	0.00729927	15516	38	0.00244908	2.58521	0.0406715	2.99497	0.0219932	0.863183	0.553337
SF3B1	11988	199	0.0165999	822	6	0.00729927	15516	297	0.0191415	0.435597	0.042499	0.376783	0.0109606	1.1561	0.120392
RB1	11988	991	0.082666	822	85	0.103406	15516	1065	0.0686388	1.27983	0.0436277	1.56495	0.000337192	0.81781	1.23472e-05
PRKN	11988	62	0.00517184	822	9	0.0109489	15516	77	0.00496262	2.12939	0.0459476	2.21963	0.0403263	0.959345	0.863917
KDM5C	11988	65	0.00542209	822	9	0.0109489	15516	88	0.00567156	2.0306	0.0537718	1.94079	0.0617494	1.04627	0.806717
MLH1	11988	52	0.00433767	822	8	0.00973236	15516	47	0.00302913	2.25591	0.0554255	3.23467	0.00592536	0.697415	0.0839676
PARP1	11988	274	0.0228562	822	28	0.0340633	15516	410	0.0264243	1.50762	0.0557386	1.29928	0.183306	1.16035	0.0609446
SRC	11988	106	0.00884218	822	13	0.0158151	15516	194	0.0125032	1.80127	0.0568894	1.26914	0.420481	1.41929	0.00405637
TSC1	11988	67	0.00558892	822	9	0.0109489	15516	107	0.00689611	1.96965	0.05997	1.5942	0.194285	1.23551	0.192379
NOTCH2	11988	337	0.0281114	822	14	0.0170316	15516	299	0.0192704	0.599032	0.060159	0.881809	0.793439	0.679322	1.69578e-06
GID4	11988	57	0.00475475	822	8	0.00973236	15516	58	0.00373808	2.05716	0.0685045	2.61933	0.0172757	0.785374	0.220485
SMARCA4	11988	117	0.00975976	822	14	0.0170316	15516	162	0.0104408	1.758	0.0691187	1.64219	0.081372	1.07052	0.58564
GNA13	11988	5	0.000417084	822	2	0.00243309	15516	1	6.44496e-05	5.84537	0.0696192	37.8415	0.00733134	0.15447	0.0923023
KMT2D	11988	271	0.0226059	822	27	0.0328467	15516	293	0.0188837	1.4684	0.0713174	1.76453	0.00904646	0.832175	0.0319422
PTCH1	11988	58	0.00483817	822	8	0.00973236	15516	98	0.00631606	2.02152	0.0719024	1.54621	0.257334	1.30741	0.123698
AXL	11988	40	0.00333667	822	6	0.00729927	15516	40	0.00257798	2.19632	0.0721154	2.84485	0.0268333	0.772034	0.26007
CREBBP	11988	311	0.0259426	822	30	0.0364964	15516	247	0.0159191	1.42222	0.0729086	2.34158	7.39422e-05	0.607375	6.47366e-09
CTNNA1	11988	212	0.0176844	822	22	0.026764	15516	182	0.0117298	1.52755	0.0778485	2.31695	0.000924312	0.659292	5.0064e-05
MSH2	11988	60	0.00500501	822	8	0.00973236	15516	66	0.00425367	1.95381	0.0794636	2.30065	0.032041	0.849243	0.369042
IGF1R	11988	266	0.0221889	822	26	0.0316302	15516	417	0.0268755	1.4394	0.0894331	1.18269	0.3791	1.21705	0.0137969
BRCA2	11988	503	0.0419586	822	45	0.0547445	15516	756	0.0487239	1.32237	0.0896897	1.13072	0.40799	1.1695	0.00809281
MAP3K13	11988	23	0.00191859	822	4	0.00486618	15516	36	0.00232019	2.54385	0.0913382	2.10269	0.140177	1.20981	0.513109
PMS2	11988	50	0.00417084	822	7	0.00851582	15516	58	0.00373808	2.0507	0.0936277	2.28911	0.0441742	0.895852	0.627093
INPP4B	11988	33	0.00275275	822	5	0.00608273	15516	45	0.00290023	2.21709	0.0936864	2.10404	0.105369	1.05373	0.909075
JUN	11988	92	0.00767434	822	11	0.013382	15516	88	0.00567156	1.75382	0.100591	2.37793	0.0168524	0.737541	0.0419919
MET	11988	52	0.00433767	822	7	0.00851582	15516	92	0.00592936	1.9715	0.10206	1.43996	0.349688	1.36914	0.0767079
BRIP1	11988	118	0.00984318	822	13	0.0158151	15516	139	0.00895849	1.61645	0.105166	1.77767	0.0589092	0.90931	0.449093
ATM	11988	296	0.0246914	822	28	0.0340633	15516	454	0.0292601	1.39295	0.106748	1.16994	0.398053	1.19061	0.0227125
ATRX	11988	95	0.00792459	822	11	0.013382	15516	122	0.00786285	1.69801	0.107328	1.71145	0.105595	0.992147	1
NOTCH3	11988	297	0.0247748	822	28	0.0340633	15516	308	0.0198505	1.38814	0.107596	1.74124	0.0108423	0.797212	0.00619076
PRKAR1A	11988	25	0.00208542	822	4	0.00486618	15516	34	0.00219129	2.33995	0.112002	2.22666	0.122176	1.05088	0.896014
FANCA	11988	128	0.0106773	822	14	0.0170316	15516	164	0.0105697	1.60543	0.116999	1.62195	0.0846032	0.989814	0.952721
SUFU	11988	26	0.00216884	822	4	0.00486618	15516	27	0.00174014	2.24976	0.123042	2.80522	0.0681779	0.801993	0.488549
BCR	11988	1	8.34168e-05	822	1	0.00121655	15516	5	0.000322248	14.6005	0.124224	3.77856	0.266392	3.86403	0.241712
DOT1L	11988	1	8.34168e-05	822	1	0.00121655	15516	5	0.000322248	14.6005	0.124224	3.77856	0.266392	3.86403	0.241712
EWSR1	11988	1	8.34168e-05	822	1	0.00121655	15516	1	6.44496e-05	14.6005	0.124224	18.8977	0.0980959	0.772607	1
GNA11	11988	1	8.34168e-05	822	1	0.00121655	15516	2	0.000128899	14.6005	0.124224	9.44823	0.143478	1.54531	1
XRCC2	11988	1	8.34168e-05	822	1	0.00121655	15516	6	0.000386698	14.6005	0.124224	3.1486	0.303315	4.63714	0.146547
RAF1	11988	107	0.00892559	822	12	0.0145985	15516	150	0.00966744	1.645	0.127579	1.51763	0.201055	1.08393	0.56961
AKT3	11988	337	0.0281114	822	31	0.0377129	15516	484	0.0311936	1.35494	0.129248	1.21719	0.30449	1.11317	0.142943
BCOR	11988	67	0.00558892	822	1	0.00121655	15516	88	0.00567156	0.216718	0.130419	0.213542	0.136215	1.01487	1
CDKN2C	11988	8	0.000667334	822	2	0.00243309	15516	14	0.000902294	3.65244	0.131478	2.7007	0.191025	1.35241	0.527918
CYP17A1	11988	8	0.000667334	822	2	0.00243309	15516	17	0.00109564	3.65244	0.131478	2.22367	0.247505	1.64253	0.313857
ABL1	11988	27	0.00225225	822	4	0.00486618	15516	30	0.00193349	2.16626	0.134525	2.52421	0.089483	0.858194	0.59423
VHL	11988	45	0.00375375	822	6	0.00729927	15516	59	0.00380253	1.95147	0.140285	1.92635	0.142477	1.01304	1
BRD4	11988	113	0.00942609	822	12	0.0145985	15516	146	0.00940964	1.55687	0.141778	1.55961	0.141177	0.998238	1
FLT3	11988	69	0.00575576	822	8	0.00973236	15516	110	0.00708946	1.69768	0.157231	1.37646	0.39205	1.23337	0.198497
FGF19	11988	1676	0.139806	822	100	0.121655	15516	3248	0.209332	0.852181	0.158778	0.523143	1.83601e-10	1.62896	3.85454e-51
ERRFI1	11988	19	0.00158492	822	3	0.00364964	15516	27	0.00174014	2.3075	0.164266	2.10134	0.190078	1.09811	0.881917
NBN	11988	49	0.00408742	822	6	0.00729927	15516	73	0.00470482	1.79157	0.165034	1.5555	0.293626	1.15176	0.465384
AR	11988	72	0.00600601	822	8	0.00973236	15516	100	0.00644496	1.62654	0.17194	1.51509	0.263022	1.07356	0.699908
CIC	11988	72	0.00600601	822	8	0.00973236	15516	95	0.00612271	1.62654	0.17194	1.59534	0.250396	1.01955	0.937703
WT1	11988	39	0.00325325	822	0	0	15516	52	0.00335138	0	0.177086	0	0.11337	1.03026	0.91605
KMT2A	11988	10	0.000834168	822	2	0.00243309	15516	29	0.00186904	2.92146	0.177488	1.30252	0.668376	2.24293	0.0239432
SPOP	11988	10	0.000834168	822	2	0.00243309	15516	26	0.00167569	2.92146	0.177488	1.4531	0.650266	2.01051	0.064144
FH	11988	20	0.00166834	822	3	0.00364964	15516	26	0.00167569	2.19194	0.180471	2.1823	0.177244	1.00442	1
DNMT3A	11988	232	0.0193527	822	10	0.0121655	15516	400	0.0257798	0.624045	0.18327	0.465394	0.0114663	1.34089	0.000409057
BAP1	11988	141	0.0117618	822	14	0.0170316	15516	131	0.0084429	1.45581	0.184823	2.0349	0.0193419	0.715423	0.00676142
CRKL	11988	37	0.00308642	822	5	0.00608273	15516	78	0.00502707	1.97674	0.190886	1.21128	0.611639	1.63195	0.0140984
STK11	11988	231	0.0192693	822	21	0.0255474	15516	232	0.0149523	1.33435	0.195413	1.72717	0.027826	0.772566	0.00610006
FANCG	11988	21	0.00175175	822	3	0.00364964	15516	31	0.00199794	2.08739	0.197082	1.82973	0.243415	1.14082	0.676806
EGFR	11988	346	0.0288622	822	30	0.0364964	15516	348	0.0224285	1.27452	0.200411	1.65099	0.0122682	0.771974	0.000844609
AMER1	11988	39	0.00325325	822	5	0.00608273	15516	58	0.00373808	1.87506	0.203133	1.63107	0.248266	1.14959	0.539161
MCL1	11988	849	0.0708208	822	68	0.0827251	15516	705	0.045437	1.18325	0.207689	1.89467	6.43902e-06	0.624516	2.53902e-19
CCND1	11988	1821	0.151902	822	111	0.135036	15516	3430	0.221062	0.871638	0.20776	0.5501	1.01642e-09	1.58451	3.29685e-48
EMSY	11988	688	0.0573907	822	38	0.0462287	15516	1305	0.0841067	0.796082	0.211533	0.527815	4.93023e-05	1.50826	1.39337e-17
AXIN1	11988	22	0.00183517	822	3	0.00364964	15516	32	0.00206239	1.99234	0.214042	1.77244	0.257122	1.12407	0.783837
ARAF	11988	63	0.00525526	822	7	0.00851582	15516	54	0.00348028	1.62577	0.216254	2.4593	0.0328097	0.661068	0.0312132
FGFR1	11988	1434	0.11962	822	86	0.104623	15516	2435	0.156935	0.85998	0.219796	0.627715	2.99838e-05	1.37002	6.92077e-19
EPHA3	11988	133	0.0110944	822	5	0.00608273	15516	153	0.00986079	0.545504	0.220827	0.614515	0.360385	0.887698	0.337615
RPTOR	11988	170	0.0141808	822	16	0.0194647	15516	185	0.0119232	1.38	0.225635	1.64507	0.0710214	0.838873	0.106068
GNAQ	11988	3	0.00025025	822	1	0.00121655	15516	1	6.44496e-05	4.86602	0.233033	18.8977	0.0980959	0.257493	0.324192
SNCAIP	11988	3	0.00025025	822	1	0.00121655	15516	4	0.000257798	4.86602	0.233033	4.72351	0.227515	1.03017	1
NFKBIA	11988	187	0.0155989	822	17	0.0206813	15516	322	0.0207528	1.33269	0.248806	0.996482	1	1.3374	0.00182596
CARD11	11988	13	0.00108442	822	2	0.00243309	15516	16	0.00103119	2.24672	0.249832	2.3628	0.228551	0.950868	1
NRAS	11988	79	0.00658992	822	8	0.00973236	15516	97	0.00625161	1.48154	0.27006	1.56225	0.254804	0.948339	0.760519
SMAD4	11988	161	0.0134301	822	15	0.0182482	15516	338	0.021784	1.36542	0.274953	0.834671	0.621416	1.63588	2.34723e-07
IRF4	11988	4	0.000333667	822	1	0.00121655	15516	5	0.000322248	3.64921	0.282264	3.77856	0.266392	0.965766	1
MERTK	11988	4	0.000333667	822	1	0.00121655	15516	9	0.000580046	3.64921	0.282264	2.09866	0.403315	1.73883	0.412955
POLD1	11988	4	0.000333667	822	1	0.00121655	15516	9	0.000580046	3.64921	0.282264	2.09866	0.403315	1.73883	0.412955
SDHB	11988	4	0.000333667	822	1	0.00121655	15516	12	0.000773395	3.64921	0.282264	1.57369	0.488976	2.31889	0.206136
SDHC	11988	4	0.000333667	822	1	0.00121655	15516	14	0.000902294	3.64921	0.282264	1.3487	0.539144	2.70572	0.0941636
MRE11	11988	32	0.00266934	822	4	0.00486618	15516	35	0.00225574	1.82702	0.289198	2.16291	0.131048	0.844705	0.537992
SMARCB1	11988	32	0.00266934	822	4	0.00486618	15516	37	0.00238464	1.82702	0.289198	2.04573	0.149551	0.893089	0.715662
FGF3	11988	1624	0.135469	822	100	0.121655	15516	3132	0.201856	0.883902	0.290544	0.547649	3.45041e-09	1.614	5.35992e-48
FLT1	11988	15	0.00125125	822	2	0.00243309	15516	7	0.000451147	1.94683	0.298631	5.40383	0.0719515	0.360268	0.0292646
GATA4	11988	15	0.00125125	822	2	0.00243309	15516	45	0.00290023	1.94683	0.298631	0.838537	1	2.3217	0.00382587
MTOR	11988	34	0.00283617	822	4	0.00486618	15516	69	0.00444702	1.71926	0.3052	1.09472	0.786145	1.5705	0.0360797
PRDM1	11988	60	0.00500501	822	6	0.00729927	15516	51	0.00328693	1.46176	0.316868	2.22967	0.0657765	0.655597	0.0274486
IDH2	11988	5	0.000417084	822	1	0.00121655	15516	18	0.00116009	2.91912	0.328338	1.04872	1	2.78351	0.0363162
PIK3CA	11988	3815	0.318235	822	248	0.301703	15516	6042	0.389404	0.925607	0.333024	0.677474	3.64342e-07	1.36626	2.14274e-34
LYN	11988	523	0.043627	822	42	0.0510949	15516	631	0.0406677	1.18039	0.33326	1.27021	0.148908	0.929293	0.225284
MYCL	11988	108	0.00900901	822	10	0.0121655	15516	116	0.00747615	1.35468	0.342999	1.63496	0.146884	0.828571	0.175971
SDHA	11988	39	0.00325325	822	4	0.00486618	15516	54	0.00348028	1.49821	0.354468	1.40016	0.537287	1.07003	0.834214
FUBP1	11988	18	0.0015015	822	2	0.00243309	15516	37	0.00238464	1.62195	0.370627	1.02037	1	1.58957	0.133616
NTRK3	11988	18	0.0015015	822	2	0.00243309	15516	27	0.00174014	1.62195	0.370627	1.39919	0.656009	1.15921	0.655105
TEK	11988	6	0.000500501	822	1	0.00121655	15516	5	0.000322248	2.4324	0.371458	3.77856	0.266392	0.643737	0.549088
TGFBR2	11988	6	0.000500501	822	1	0.00121655	15516	14	0.000902294	2.4324	0.371458	1.3487	0.539144	1.80351	0.263831
CBL	11988	47	0.00392059	822	5	0.00608273	15516	59	0.00380253	1.55486	0.384261	1.60332	0.255467	0.969772	0.921917
TET2	11988	132	0.011011	822	6	0.00729927	15516	217	0.0139856	0.660428	0.38508	0.518399	0.122017	1.27398	0.0297644
KDM6A	11988	199	0.0165999	822	17	0.0206813	15516	183	0.0117943	1.25106	0.398481	1.76941	0.0326497	0.707046	0.000862982
DAXX	11988	24	0.002002	822	0	0	15516	31	0.00199794	0	0.400364	0	0.404674	0.997966	1
FGFR3	11988	51	0.00425425	822	5	0.00608273	15516	98	0.00631606	1.43243	0.406868	0.962831	1	1.48773	0.024989
GRM3	11988	26	0.00216884	822	0	0	15516	20	0.00128899	0	0.409281	0	0.622424	0.593801	0.100611
DDR2	11988	7	0.000583917	822	1	0.00121655	15516	14	0.000902294	2.08474	0.411813	1.3487	0.539144	1.54574	0.386122
HSD3B1	11988	7	0.000583917	822	1	0.00121655	15516	9	0.000580046	2.08474	0.411813	2.09866	0.403315	0.993367	1
MAP2K2	11988	27	0.00225225	822	0	0	15516	34	0.00219129	0	0.415332	0	0.415983	0.972872	1
BCL2L1	11988	153	0.0127628	822	13	0.0158151	15516	165	0.0106342	1.243	0.424713	1.49502	0.165433	0.831427	0.11115
SETD2	11988	99	0.00825826	822	9	0.0109489	15516	165	0.0106342	1.32942	0.425779	1.02992	0.861406	1.2908	0.0460698
CHEK2	11988	234	0.0195195	822	12	0.0145985	15516	442	0.0284867	0.74416	0.428659	0.505246	0.0160264	1.47287	1.58402e-06
CDC73	11988	26	0.00216884	822	3	0.00364964	15516	41	0.00264243	1.68526	0.430109	1.38256	0.485324	1.21894	0.461168
KRAS	11988	476	0.0397064	822	37	0.0450122	15516	650	0.0418922	1.13992	0.461221	1.07799	0.65534	1.05746	0.373621
CSF1R	11988	31	0.00258592	822	3	0.00364964	15516	36	0.00232019	1.41286	0.478553	1.57509	0.44596	0.896999	0.711818
GABRA6	11988	9	0.000750751	822	1	0.00121655	15516	17	0.00109564	1.62119	0.484924	1.11048	0.605324	1.4599	0.430972
CUL3	11988	32	0.00266934	822	3	0.00364964	15516	51	0.00328693	1.36859	0.489603	1.11075	0.752493	1.23213	0.376884
IRF2	11988	32	0.00266934	822	3	0.00364964	15516	26	0.00167569	1.36859	0.489603	2.1823	0.177244	0.62713	0.0848173
FGF4	11988	1598	0.1333	822	102	0.124088	15516	3094	0.199407	0.921099	0.489626	0.568773	3.25272e-08	1.61945	3.49862e-48
BCL2L2	11988	132	0.011011	822	11	0.013382	15516	126	0.00812065	1.21825	0.491784	1.65668	0.113493	0.735354	0.0163735
PBRM1	11988	76	0.00633967	822	7	0.00851582	15516	125	0.0080562	1.34621	0.494825	1.05754	0.840496	1.27296	0.100929
STAG2	11988	77	0.00642309	822	7	0.00851582	15516	142	0.00915184	1.32861	0.497349	0.929906	1	1.42876	0.0113705
SMAD2	11988	33	0.00275275	822	3	0.00364964	15516	59	0.00380253	1.32701	0.500953	0.959645	1	1.38281	0.141516
CDKN1B	11988	146	0.0121788	822	7	0.00851582	15516	263	0.0169502	0.696647	0.503982	0.498127	0.0670614	1.39853	0.00127762
MED12	11988	37	0.00308642	822	1	0.00121655	15516	37	0.00238464	0.393423	0.51467	0.509563	1	0.772078	0.291308
MEN1	11988	90	0.00750751	822	4	0.00486618	15516	221	0.0142434	0.646455	0.526225	0.338426	0.0201266	1.91018	1.01849e-07
EPHB4	11988	91	0.00759092	822	8	0.00973236	15516	102	0.00657386	1.28488	0.532571	1.48519	0.26951	0.865129	0.343736
BRAF	11988	161	0.0134301	822	13	0.0158151	15516	261	0.0168213	1.18044	0.532593	0.939218	1	1.25683	0.0259009
IKBKE	11988	267	0.0222723	822	21	0.0255474	15516	506	0.0326115	1.15091	0.541947	0.777709	0.310433	1.47987	2.41832e-07
SPEN	11988	281	0.0234401	822	22	0.026764	15516	388	0.0250064	1.1457	0.551875	1.07222	0.730959	1.06854	0.407526
NKX2-1	11988	98	0.00817484	822	8	0.00973236	15516	225	0.0145012	1.1924	0.552141	0.667912	0.362209	1.78526	1.06127e-06
MDM4	11988	418	0.0348682	822	32	0.0389294	15516	661	0.0426012	1.12119	0.556048	0.91032	0.722021	1.23165	0.00111706
KEAP1	11988	46	0.00383717	822	4	0.00486618	15516	81	0.00522042	1.26948	0.561104	0.931812	1	1.36238	0.106213
CEBPA	11988	12	0.001001	822	1	0.00121655	15516	24	0.00154679	1.21559	0.577927	0.786236	1	1.54609	0.241807
FGFR2	11988	328	0.0273607	822	25	0.0304136	15516	438	0.0282289	1.11508	0.581592	1.07982	0.666496	1.03265	0.684459
RET	11988	126	0.0105105	822	10	0.0121655	15516	164	0.0105697	1.15939	0.597547	1.15283	0.600811	1.00569	1
FBXW7	11988	138	0.0115115	822	11	0.013382	15516	126	0.00812065	1.16469	0.612159	1.65668	0.113493	0.703026	0.00492872
APC	11988	141	0.0117618	822	11	0.013382	15516	201	0.0129544	1.13962	0.617675	1.03346	0.87393	1.10273	0.380699
PDGFRB	11988	15	0.00125125	822	0	0	15516	30	0.00193349	0	0.619422	0	0.402311	1.5463	0.178366
AURKB	11988	17	0.00141808	822	0	0	15516	12	0.000773395	0	0.622257	0	1	0.545028	0.132877
NFE2L2	11988	20	0.00166834	822	0	0	15516	45	0.00290023	0	0.635788	0	0.171862	1.74055	0.0444093
HRAS	11988	87	0.00725726	822	4	0.00486618	15516	85	0.00547822	0.668915	0.664461	0.887732	1	0.75351	0.0645674
HGF	11988	198	0.0165165	822	15	0.0182482	15516	198	0.012761	1.10679	0.671837	1.43799	0.203039	0.769683	0.0106335
MITF	11988	32	0.00266934	822	1	0.00121655	15516	21	0.00135344	0.455085	0.721431	0.89873	1	0.506365	0.0176701
RNF43	11988	41	0.00342009	822	3	0.00364964	15516	64	0.00412477	1.06736	0.75946	0.884386	1	1.2069	0.375697
ERBB3	11988	190	0.0158492	822	11	0.013382	15516	257	0.0165635	0.842222	0.770702	0.805313	0.5737	1.04583	0.665305
GATA6	11988	53	0.00442109	822	4	0.00486618	15516	61	0.00393143	1.10117	0.784426	1.23893	0.569213	0.888807	0.570456
MYB	11988	55	0.00458792	822	4	0.00486618	15516	58	0.00373808	1.06095	0.790265	1.30326	0.554175	0.81407	0.296097
GATA3	11988	992	0.0827494	822	70	0.0851582	15516	1779	0.114656	1.03182	0.793714	0.71878	0.00923739	1.43551	1.60821e-18
CTCF	11988	68	0.00567234	822	5	0.00608273	15516	97	0.00625161	1.07279	0.809601	0.97282	1	1.10276	0.581746
CCND2	11988	311	0.0259426	822	22	0.026764	15516	206	0.0132766	1.03253	0.821237	2.04381	0.00327328	0.5052	2.3832e-14
NF2	11988	86	0.00717384	822	6	0.00729927	15516	83	0.00534932	1.01761	0.83263	1.3672	0.458755	0.744302	0.0616255
CASP8	11988	88	0.00734067	822	5	0.00608273	15516	104	0.00670276	0.827584	0.833347	0.90693	1	0.912512	0.559255
MDM2	11988	450	0.0375375	822	32	0.0389294	15516	769	0.0495617	1.03858	0.84947	0.776784	0.184723	1.33703	1.42457e-06
MAP3K1	11988	592	0.0493827	822	39	0.0474453	15516	995	0.0641274	0.958812	0.867808	0.726903	0.0558717	1.31904	1.78233e-07
MUTYH	11988	196	0.0163497	822	12	0.0145985	15516	292	0.0188193	0.891308	0.886112	0.7724	0.506049	1.15395	0.128625
FGF6	11988	304	0.0253587	822	21	0.0255474	15516	209	0.01347	1.00764	0.908949	1.92013	0.00873219	0.524776	8.19016e-13
PIK3C2B	11988	506	0.0422089	822	35	0.0425791	15516	670	0.0431812	1.00916	0.928585	0.985435	1	1.02408	0.696162
ALOX12B	11988	2	0.000166834	822	0	0	15516	5	0.000322248	0	1	0	1	1.93185	0.70643
BCL2	11988	67	0.00558892	822	4	0.00486618	15516	76	0.00489817	0.870051	1	0.993437	1	0.875798	0.447327
BCL6	11988	10	0.000834168	822	0	0	15516	10	0.000644496	0	1	0	1	0.772475	0.653774
BTG1	11988	4	0.000333667	822	0	0	15516	7	0.000451147	0	1	0	1	1.35225	0.765693
BTK	11988	6	0.000500501	822	0	0	15516	3	0.000193349	0	1	0	1	0.386192	0.190787
CD79A	11988	2	0.000166834	822	0	0	15516	2	0.000128899	0	1	0	1	0.772592	1
CD79B	11988	0	0	822	0	0	15516	1	6.44496e-05	nan	1	0	1	nan	1
CDK4	11988	236	0.0196864	822	16	0.0194647	15516	278	0.017917	0.988518	1	1.0881	0.686562	0.908483	0.281704
CDK8	11988	50	0.00417084	822	3	0.00364964	15516	91	0.00586491	0.874579	1	0.620899	0.632599	1.40857	0.0606788
CDKN1A	11988	7	0.000583917	822	0	0	15516	14	0.000902294	0	1	0	1	1.54574	0.386122
CHEK1	11988	8	0.000667334	822	0	0	15516	10	0.000644496	0	1	0	1	0.965755	1
CTNNB1	11988	74	0.00617284	822	5	0.00608273	15516	76	0.00489817	0.985312	1	1.24332	0.605265	0.792487	0.160973
DDR1	11988	11	0.000917584	822	0	0	15516	8	0.000515597	0	1	0	1	0.561681	0.249509
ERCC4	11988	20	0.00166834	822	1	0.00121655	15516	31	0.00199794	0.728867	1	0.608424	1	1.19796	0.573908
ERG	11988	1	8.34168e-05	822	0	0	15516	2	0.000128899	0	1	0	1	1.54531	1
ETV4	11988	0	0	822	0	0	15516	0	0	nan	1	nan	1	nan	1
ETV5	11988	0	0	822	0	0	15516	2	0.000128899	nan	1	0	1	nan	0.508209
EZH2	11988	74	0.00617284	822	5	0.00608273	15516	83	0.00534932	0.985312	1	1.13794	0.804022	0.865872	0.375628
FAM46C	11988	1	8.34168e-05	822	0	0	15516	4	0.000257798	0	1	0	1	3.09103	0.395356
FANCL	11988	20	0.00166834	822	1	0.00121655	15516	23	0.00148234	0.728867	1	0.820473	1	0.88835	0.758996
FGF23	11988	299	0.0249416	822	20	0.0243309	15516	208	0.0134055	0.974904	1	1.83532	0.0140542	0.531191	2.38446e-12
FLCN	11988	32	0.00266934	822	2	0.00243309	15516	58	0.00373808	0.91128	1	0.650042	0.769748	1.40188	0.136375
FOXL2	11988	0	0	822	0	0	15516	0	0	nan	1	nan	1	nan	1
GSK3B	11988	1	8.34168e-05	822	0	0	15516	4	0.000257798	0	1	0	1	3.09103	0.395356
H3F3A	11988	0	0	822	0	0	15516	3	0.000193349	nan	1	0	1	nan	0.262314
IDH1	11988	10	0.000834168	822	0	0	15516	19	0.00122454	0	1	0	0.622301	1.46856	0.354565
JAK3	11988	14	0.00116783	822	1	0.00121655	15516	11	0.000708946	1.04176	1	1.71686	0.461882	0.606781	0.230238
KDM5A	11988	463	0.038622	822	31	0.0377129	15516	336	0.0216551	0.97554	1	1.77059	0.00502125	0.550969	1.76613e-16
KLHL6	11988	7	0.000583917	822	0	0	15516	10	0.000644496	0	1	0	1	1.10381	1
LTK	11988	5	0.000417084	822	0	0	15516	6	0.000386698	0	1	0	1	0.927118	1
MEF2B	11988	1	8.34168e-05	822	0	0	15516	4	0.000257798	0	1	0	1	3.09103	0.395356
MKNK1	11988	0	0	822	0	0	15516	0	0	nan	1	nan	1	nan	1
MPL	11988	4	0.000333667	822	0	0	15516	3	0.000193349	0	1	0	1	0.579385	0.478472
MST1R	11988	3	0.00025025	822	0	0	15516	10	0.000644496	0	1	0	1	2.57642	0.167844
MYD88	11988	4	0.000333667	822	0	0	15516	7	0.000451147	0	1	0	1	1.35225	0.765693
NPM1	11988	14	0.00116783	822	1	0.00121655	15516	21	0.00135344	1.04176	1	0.89873	1	1.15915	0.734935
NTRK2	11988	7	0.000583917	822	0	0	15516	10	0.000644496	0	1	0	1	1.10381	1
PARP2	11988	1	8.34168e-05	822	0	0	15516	2	0.000128899	0	1	0	1	1.54531	1
PARP3	11988	0	0	822	0	0	15516	0	0	nan	1	nan	1	nan	1
PAX5	11988	45	0.00375375	822	3	0.00364964	15516	62	0.00399588	0.972161	1	0.913033	1	1.06476	0.77043
PDK1	11988	0	0	822	0	0	15516	0	0	nan	1	nan	1	nan	1
PIK3C2G	11988	8	0.000667334	822	0	0	15516	10	0.000644496	0	1	0	1	0.965755	1
PPARG	11988	1	8.34168e-05	822	0	0	15516	2	0.000128899	0	1	0	1	1.54531	1
PPP2R1A	11988	9	0.000750751	822	0	0	15516	13	0.000837845	0	1	0	1	1.11611	0.833677
RAC1	11988	3	0.00025025	822	0	0	15516	15	0.000966744	0	1	0	1	3.86588	0.0295701
RAD51	11988	14	0.00116783	822	0	0	15516	31	0.00199794	0	1	0	0.404674	1.71223	0.0991868
RAD51C	11988	44	0.00367034	822	3	0.00364964	15516	56	0.00360918	0.994339	1	1.01125	1	0.983276	1
RAD52	11988	0	0	822	0	0	15516	0	0	nan	1	nan	1	nan	1
RAD54L	11988	16	0.00133467	822	1	0.00121655	15516	27	0.00174014	0.911389	1	0.698741	1	1.30433	0.444012
RARA	11988	24	0.002002	822	1	0.00121655	15516	16	0.00103119	0.607186	1	1.17996	0.584393	0.514581	0.0388088
REL	11988	79	0.00658992	822	5	0.00608273	15516	57	0.00367363	0.922563	1	1.6598	0.241297	0.55583	0.000694198
RSPO2	11988	0	0	822	0	0	15516	1	6.44496e-05	nan	1	0	1	nan	1
SDHD	11988	2	0.000166834	822	0	0	15516	8	0.000515597	0	1	0	1	3.09157	0.202594
SOCS1	11988	2	0.000166834	822	0	0	15516	4	0.000257798	0	1	0	1	1.54538	0.702643
STAT3	11988	16	0.00133467	822	1	0.00121655	15516	14	0.000902294	0.911389	1	1.3487	0.539144	0.675752	0.357251
SYK	11988	1	8.34168e-05	822	0	0	15516	2	0.000128899	0	1	0	1	1.54531	1
TBX3	11988	395	0.0329496	822	27	0.0328467	15516	670	0.0431812	0.996771	1	0.752543	0.183085	1.32454	1.16364e-05
TIPARP	11988	4	0.000333667	822	0	0	15516	6	0.000386698	0	1	0	1	1.15899	1
TMPRSS2	11988	1	8.34168e-05	822	0	0	15516	2	0.000128899	0	1	0	1	1.54531	1
TNFRSF14	11988	11	0.000917584	822	0	0	15516	15	0.000966744	0	1	0	1	1.05363	1
TYRO3	11988	1	8.34168e-05	822	0	0	15516	2	0.000128899	0	1	0	1	1.54531	1
U2AF1	11988	9	0.000750751	822	0	0	15516	12	0.000773395	0	1	0	1	1.03019	1
XPO1	11988	11	0.000917584	822	0	0	15516	21	0.00135344	0	1	0	0.623492	1.47565	0.37304
ZNF703	11988	1473	0.122873	822	101	0.122871	15516	2647	0.170598	0.999983	1	0.681047	0.000269083	1.4683	1.63846e-28

## Sheet: FDR Prev all
Prevalence >0.5%: Genes with prevalence more than 0.5% in any cohort and Benjamini-Hochberg p-value
Gene	% var local	% var brain met	% var other met	pval brain met vs BC	Benjamini-Hochberg P-value BM vs BC	pval brain met vs other met	Benjamini-Hochberg P-value BM vs Other Met	pval other met vs BC	Benjamini-Hochberg P-value Other Met vs BC
TP53	0.585335	0.717762	0.440384	2.92814e-14	2.78173e-12	2.41715e-55	4.59258e-53	5.15749e-126	4.89962e-124
PIK3CA	0.318235	0.301703	0.389404	0.333024	0.455535	3.64342e-07	3.79868e-06	2.14274e-34	5.81601e-33
MYC	0.211295	0.259124	0.17208	0.00154501	0.010486	1.15419e-09	2.19295e-08	2.35061e-16	2.62716e-15
ERBB2	0.116116	0.245742	0.110596	5.56568e-23	1.05748e-20	5.89991e-26	3.73661e-24	0.155277	0.256545
PTEN	0.135219	0.166667	0.117105	0.0136849	0.0481505	4.26686e-05	0.000253345	7.21783e-06	4.03349e-05
CCND1	0.151902	0.135036	0.221062	0.20776	0.318342	1.01642e-09	2.14577e-08	3.29685e-48	1.32947e-46
FGF4	0.1333	0.124088	0.199407	0.489626	0.617623	3.25272e-08	4.4144e-07	3.49862e-48	1.32947e-46
ZNF703	0.122873	0.122871	0.170598	1	1	0.000269083	0.00131092	1.63846e-28	3.45897e-27
FGF19	0.139806	0.121655	0.209332	0.158778	0.266972	1.83601e-10	6.97682e-09	3.85454e-51	2.44121e-49
FGF3	0.135469	0.121655	0.201856	0.290544	0.408914	3.45041e-09	5.46315e-08	5.35992e-48	1.69731e-46
FGFR1	0.11962	0.104623	0.156935	0.219796	0.327789	2.99838e-05	0.000196445	6.92077e-19	1.09579e-17
CDKN2A	0.0689857	0.103406	0.0693478	0.000430712	0.00430712	0.000467723	0.00206668	0.923657	0.969964
RB1	0.082666	0.103406	0.0686388	0.0436277	0.107653	0.000337192	0.00152539	1.23472e-05	6.17358e-05
NF1	0.0593927	0.0863747	0.0681877	0.00320854	0.0156919	0.0481237	0.093301	0.0031893	0.0100995
GATA3	0.0827494	0.0851582	0.114656	0.793714	0.876777	0.00923739	0.0250729	1.60821e-18	2.35046e-17
MCL1	0.0708208	0.0827251	0.045437	0.207689	0.318342	6.43902e-06	4.89366e-05	2.53902e-19	4.38558e-18
GNAS	0.0538038	0.0790754	0.0622583	0.00343983	0.0163392	0.0556929	0.106156	0.00315163	0.0100995
BRCA1	0.0427094	0.0778589	0.0320315	1.64032e-05	0.000311661	7.45708e-10	1.77106e-08	3.61889e-06	2.0836e-05
CDKN2B	0.0494661	0.0778589	0.0497551	0.000756152	0.0065304	0.000811568	0.0035045	0.933071	0.969964
ZNF217	0.0581415	0.0778589	0.0688322	0.0265736	0.0767841	0.323457	0.418074	0.000350945	0.00144956
ARID1A	0.04663	0.0729927	0.0739881	0.00131717	0.0101472	1	1	3.92877e-21	7.46467e-20
CCNE1	0.0481315	0.06691	0.0290668	0.0195616	0.0623191	7.03487e-08	8.91084e-07	2.14829e-16	2.5511e-15
ESR1	0.0368702	0.0644769	0.207528	0.00023301	0.00295146	7.00084e-29	6.6508e-27	0	0
MAP2K4	0.0407908	0.0583942	0.057489	0.0189874	0.0623191	0.87794	0.931891	2.41197e-10	2.18226e-09
AURKA	0.0388722	0.0547445	0.0491106	0.0333904	0.0906311	0.457066	0.555181	4.23302e-05	0.000196165
BRCA2	0.0419586	0.0547445	0.0487239	0.0896897	0.181288	0.40799	0.503364	0.00809281	0.0216568
PIK3R1	0.0362863	0.0510949	0.0269399	0.0357048	0.094221	0.000195925	0.000979627	1.12599e-05	6.1125e-05
LYN	0.043627	0.0510949	0.0406677	0.33326	0.455535	0.148908	0.227318	0.225284	0.348
ARFRP1	0.0303637	0.0498783	0.0402166	0.00367872	0.0170477	0.173816	0.258007	1.35198e-05	6.58659e-05
MAP3K1	0.0493827	0.0474453	0.0641274	0.867808	0.926312	0.0558717	0.106156	1.78233e-07	1.41101e-06
EMSY	0.0573907	0.0462287	0.0841067	0.211533	0.321531	4.93023e-05	0.000283862	1.39337e-17	1.891e-16
CCND3	0.0195195	0.0450122	0.0123743	1.2928e-05	0.000272925	2.81596e-10	8.14335e-09	2.64644e-06	1.57132e-05
KRAS	0.0397064	0.0450122	0.0418922	0.461221	0.588134	0.65534	0.741158	0.373621	0.520943
PRKCI	0.0154321	0.0437956	0.0130188	1.97913e-07	7.21008e-06	3.10459e-09	5.36247e-08	0.0984877	0.183029
VEGFA	0.0182683	0.0437956	0.0117943	7.09445e-06	0.000168493	3.00018e-10	8.14335e-09	1.22426e-05	6.17358e-05
CDH1	0.094678	0.0425791	0.140693	5.84992e-08	3.70495e-06	1.83158e-19	8.70001e-18	1.03687e-31	2.46258e-30
TERC	0.0186854	0.0425791	0.0157902	2.7629e-05	0.000477228	6.41193e-07	5.80127e-06	0.0671254	0.132852
PIK3C2B	0.0422089	0.0425791	0.0431812	0.928585	0.974758	1	1	0.696162	0.805954
AKT2	0.0191024	0.0413625	0.01405	9.92476e-05	0.00145054	1.50846e-07	1.79129e-06	0.00106802	0.0039789
NOTCH1	0.0257758	0.0413625	0.0181103	0.0133112	0.0480147	3.53306e-05	0.000216542	1.49506e-05	7.10155e-05
CDK12	0.0134301	0.040146	0.011472	2.27687e-07	7.21008e-06	6.03048e-09	8.81378e-08	0.151959	0.253266
MDM4	0.0348682	0.0389294	0.0426012	0.556048	0.656206	0.722021	0.802245	0.00111706	0.00408156
MDM2	0.0375375	0.0389294	0.0495617	0.84947	0.91186	0.184723	0.267919	1.42457e-06	9.33338e-06
JAK2	0.0181849	0.0377129	0.0135344	0.000352785	0.00394289	1.50812e-06	1.30247e-05	0.00228805	0.00749532
AKT3	0.0281114	0.0377129	0.0311936	0.129248	0.227381	0.30449	0.398987	0.142943	0.240347
KDM5A	0.038622	0.0377129	0.0216551	1	1	0.00502125	0.0161701	1.76613e-16	2.2371e-15
NTRK1	0.0208542	0.0364964	0.0163702	0.00612235	0.0267415	0.000153055	0.000785958	0.00648945	0.0181323
CREBBP	0.0259426	0.0364964	0.0159191	0.0729086	0.153918	7.39422e-05	0.00039025	6.47366e-09	5.59088e-08
EGFR	0.0288622	0.0364964	0.0224285	0.200411	0.314695	0.0122682	0.0314995	0.000844609	0.00327502
CD274	0.0156823	0.0352798	0.0112142	0.000199124	0.0027024	3.67559e-07	3.79868e-06	0.00135394	0.00470597
SOX2	0.00959293	0.0340633	0.0115365	9.23102e-08	4.38474e-06	1.77555e-06	1.46676e-05	0.124447	0.214954
PDCD1LG2	0.0152653	0.0340633	0.0108275	0.000288599	0.00342711	5.8265e-07	5.53517e-06	0.00136225	0.00470597
PARP1	0.0228562	0.0340633	0.0264243	0.0557386	0.130745	0.183306	0.267908	0.0609446	0.125864
ATM	0.0246914	0.0340633	0.0292601	0.106748	0.198478	0.398053	0.494314	0.0227125	0.054625
NOTCH3	0.0247748	0.0340633	0.0198505	0.107596	0.198478	0.0108423	0.0289239	0.00619076	0.0175559
KMT2D	0.0226059	0.0328467	0.0188837	0.0713174	0.153918	0.00904646	0.0249105	0.0319422	0.0705701
TBX3	0.0329496	0.0328467	0.0431812	1	1	0.183085	0.267908	1.16364e-05	6.14144e-05
IGF1R	0.0221889	0.0316302	0.0268755	0.0894331	0.181288	0.3791	0.477013	0.0137969	0.0354245
FGFR2	0.0273607	0.0304136	0.0282289	0.581592	0.67793	0.666496	0.749315	0.684459	0.797835
IRS2	0.0141808	0.0279805	0.0117943	0.00425288	0.0192392	0.000311752	0.00147913	0.0839831	0.157988
FAS	0.0114281	0.026764	0.00973189	0.000814288	0.00672673	5.81356e-05	0.000315593	0.188725	0.303879
KIT	0.0124291	0.026764	0.0076695	0.00229831	0.0132826	2.12054e-06	1.67876e-05	8.97214e-05	0.000387433
PALB2	0.0131798	0.026764	0.0130188	0.00322097	0.0156919	0.00287033	0.0102899	0.914874	0.969964
AKT1	0.0432099	0.026764	0.0478216	0.0243233	0.074539	0.00382004	0.0125139	0.0713955	0.13842
CTNNA1	0.0176844	0.026764	0.0117298	0.0778485	0.162541	0.000924312	0.00381781	5.0064e-05	0.00022648
SPEN	0.0234401	0.026764	0.0250064	0.551875	0.655668	0.730959	0.807455	0.407526	0.54766
CCND2	0.0259426	0.026764	0.0132766	0.821237	0.896753	0.00327328	0.0113077	2.3832e-14	2.5156e-13
RICTOR	0.0133467	0.0255474	0.01347	0.00840663	0.0325971	0.00873219	0.0243988	0.957875	0.978474
STK11	0.0192693	0.0255474	0.0149523	0.195413	0.309404	0.027826	0.0607695	0.00610006	0.0175559
IKBKE	0.0222723	0.0255474	0.0326115	0.541947	0.651708	0.310433	0.403988	2.41832e-07	1.76724e-06
FGF6	0.0253587	0.0255474	0.01347	0.908949	0.959446	0.00873219	0.0243988	8.19016e-13	8.19016e-12
FGF12	0.00967634	0.0243309	0.0123743	0.000528415	0.0047809	0.00646003	0.0191782	0.0374114	0.0807747
FGF23	0.0249416	0.0243309	0.0134055	1	1	0.0140542	0.0356039	2.38446e-12	2.26524e-11
PDGFRA	0.00992659	0.0231144	0.00689611	0.00138856	0.0101472	1.7083e-05	0.000120214	0.0069314	0.0188138
ROS1	0.0100934	0.0231144	0.0088296	0.00247351	0.0138225	0.000319181	0.00147913	0.284238	0.421916
KDR	0.0102603	0.0231144	0.00708946	0.00264558	0.0139628	2.40023e-05	0.000162873	0.00523021	0.0155272
CDK6	0.0124291	0.0231144	0.0107631	0.0159464	0.0541038	0.00337083	0.0114368	0.209474	0.328927
PIK3CB	0.00650651	0.0218978	0.00618716	3.33445e-05	0.000527955	1.4879e-05	0.000108731	0.75935	0.855021
CUL4A	0.0125959	0.0218978	0.00953854	0.037481	0.0975534	0.00195276	0.007275	0.016183	0.0401867
EP300	0.00984318	0.0206813	0.00812065	0.00702791	0.0296734	0.000853105	0.003602	0.136073	0.230839
NFKBIA	0.0155989	0.0206813	0.0207528	0.248806	0.363639	1	1	0.00182596	0.00619523
KDM6A	0.0165999	0.0206813	0.0117943	0.398481	0.525774	0.0326497	0.0677591	0.000862982	0.00327933
RPTOR	0.0141808	0.0194647	0.0119232	0.225635	0.33233	0.0710214	0.127303	0.106068	0.190382
CDK4	0.0196864	0.0194647	0.017917	1	1	0.686562	0.767334	0.281704	0.421446
FGF10	0.00700701	0.0182482	0.00915184	0.00154531	0.010486	0.0155692	0.037925	0.0510348	0.106556
KEL	0.00817484	0.0182482	0.00915184	0.00619276	0.0267415	0.0155692	0.037925	0.396224	0.537732
SMAD4	0.0134301	0.0182482	0.021784	0.274953	0.395766	0.621416	0.707	2.34723e-07	1.76724e-06
HGF	0.0165165	0.0182482	0.012761	0.671837	0.759815	0.203039	0.28789	0.0106335	0.0280606
FGFR4	0.00533867	0.0170316	0.0106986	0.000391795	0.00413561	0.118452	0.194017	9.03616e-07	6.35878e-06
ERBB4	0.00550551	0.0170316	0.00734725	0.000512337	0.0047809	0.00638572	0.0191782	0.0700432	0.137198
MSH6	0.00633967	0.0170316	0.00644496	0.0016945	0.0111019	0.00173706	0.00660084	0.939333	0.969964
ATR	0.00667334	0.0170316	0.00908739	0.00257765	0.0139628	0.0385769	0.0788131	0.0291077	0.0666321
ETV6	0.00759092	0.0170316	0.00418922	0.00800533	0.0318667	3.51059e-05	0.000216542	0.000246657	0.00104144
NOTCH2	0.0281114	0.0170316	0.0192704	0.060159	0.136074	0.793439	0.866399	1.69578e-06	1.03935e-05
SMARCA4	0.00975976	0.0170316	0.0104408	0.0691187	0.152704	0.081372	0.144492	0.58564	0.71328
FANCA	0.0106773	0.0170316	0.0105697	0.116999	0.211712	0.0846032	0.148839	0.952721	0.97847
BAP1	0.0117618	0.0170316	0.0084429	0.184823	0.297596	0.0193419	0.0448165	0.00676142	0.0186184
MYCN	0.00600601	0.0158151	0.00547822	0.0028511	0.0146408	0.00123425	0.00497296	0.572943	0.706878
TSC2	0.00767434	0.0158151	0.0081851	0.0242791	0.074539	0.0302235	0.0652553	0.681589	0.797835
ASXL1	0.00817484	0.0158151	0.0101186	0.030668	0.0844482	0.113261	0.187511	0.0992209	0.183029
SRC	0.00884218	0.0158151	0.0125032	0.0568894	0.131817	0.420481	0.515428	0.00405637	0.0126346
BRIP1	0.00984318	0.0158151	0.00895849	0.105166	0.198478	0.0589092	0.110819	0.449093	0.592554
BCL2L1	0.0127628	0.0158151	0.0106342	0.424713	0.550306	0.165433	0.247498	0.11115	0.197369
BRAF	0.0134301	0.0158151	0.0168213	0.532593	0.644539	1	1	0.0259009	0.0607553
BARD1	0.00508842	0.0145985	0.00322248	0.00220143	0.0132826	5.12787e-05	0.000286557	0.0164977	0.0401867
RAF1	0.00892559	0.0145985	0.00966744	0.127579	0.226543	0.201055	0.287221	0.56961	0.706878
BRD4	0.00942609	0.0145985	0.00940964	0.141778	0.242682	0.141177	0.221683	1	1
CHEK2	0.0195195	0.0145985	0.0284867	0.428659	0.550306	0.0160264	0.0385445	1.58402e-06	1.00321e-05
MUTYH	0.0163497	0.0145985	0.0188193	0.886112	0.940565	0.506049	0.60854	0.128625	0.220169
EPHB1	0.00408742	0.013382	0.00418922	0.00134295	0.0101472	0.00140358	0.00544246	0.924844	0.969964
RAD51B	0.00442109	0.013382	0.00412477	0.00230698	0.0132826	0.00125633	0.00497296	0.709716	0.812326
JUN	0.00767434	0.013382	0.00567156	0.100591	0.195024	0.0168524	0.0400243	0.0419919	0.0896456
ATRX	0.00792459	0.013382	0.00786285	0.107328	0.198478	0.105595	0.179135	1	1
BCL2L2	0.011011	0.013382	0.00812065	0.491784	0.617623	0.113493	0.187511	0.0163735	0.0401867
FBXW7	0.0115115	0.013382	0.00812065	0.612159	0.704911	0.113493	0.187511	0.00492872	0.0148644
APC	0.0117618	0.013382	0.0129544	0.617675	0.706977	0.87393	0.931891	0.380699	0.524151
ERBB3	0.0158492	0.013382	0.0165635	0.770702	0.86647	0.5737	0.668731	0.665305	0.788427
HNF1A	0.0015015	0.0121655	0.00109564	5.08696e-06	0.000138075	3.79868e-07	3.79868e-06	0.395224	0.537732
SOX9	0.00458792	0.0121655	0.00567156	0.00805055	0.0318667	0.031732	0.0676421	0.236737	0.362743
FANCC	0.00458792	0.0121655	0.00451147	0.00805055	0.0318667	0.00667532	0.0195125	0.928224	0.969964
ACVR1B	0.00492159	0.0121655	0.00406032	0.0121565	0.0461949	0.0034488	0.011496	0.314329	0.459403
BCORL1	0.00500501	0.0121655	0.00515597	0.0133936	0.0480147	0.0148414	0.0371035	0.931953	0.969964
FGF14	0.00542209	0.0121655	0.00522042	0.0278492	0.0789755	0.0249447	0.0557587	0.867177	0.952391
DNMT3A	0.0193527	0.0121655	0.0257798	0.18327	0.297596	0.0114663	0.0298439	0.000409057	0.00165363
MYCL	0.00900901	0.0121655	0.00747615	0.342999	0.465499	0.146884	0.226894	0.175971	0.285765
RET	0.0105105	0.0121655	0.0105697	0.597547	0.692281	0.600811	0.696062	1	1
PRKN	0.00517184	0.0109489	0.00496262	0.0459476	0.111924	0.0403263	0.0808847	0.863917	0.952391
KDM5C	0.00542209	0.0109489	0.00567156	0.0537718	0.129325	0.0617494	0.115023	0.806717	0.901625
TSC1	0.00558892	0.0109489	0.00689611	0.05997	0.136074	0.194285	0.279653	0.192379	0.307159
SETD2	0.00825826	0.0109489	0.0106342	0.425779	0.550306	0.861406	0.924673	0.0460698	0.0972584
MLH1	0.00433767	0.00973236	0.00302913	0.0554255	0.130745	0.00592536	0.018456	0.0839676	0.157988
GID4	0.00475475	0.00973236	0.00373808	0.0685045	0.152704	0.0172757	0.0405232	0.220485	0.343378
PTCH1	0.00483817	0.00973236	0.00631606	0.0719024	0.153918	0.257334	0.346762	0.123698	0.214954
MSH2	0.00500501	0.00973236	0.00425367	0.0794636	0.16411	0.032041	0.0676421	0.369042	0.519393
FLT3	0.00575576	0.00973236	0.00708946	0.157231	0.266732	0.39205	0.490063	0.198497	0.314287
CIC	0.00600601	0.00973236	0.00612271	0.17194	0.281625	0.250396	0.344748	0.937703	0.969964
AR	0.00600601	0.00973236	0.00644496	0.17194	0.281625	0.263022	0.351931	0.699908	0.805954
NRAS	0.00658992	0.00973236	0.00625161	0.27006	0.39169	0.254804	0.346705	0.760519	0.855021
EPHB4	0.00759092	0.00973236	0.00657386	0.532571	0.644539	0.26951	0.35809	0.343736	0.491051
NKX2-1	0.00817484	0.00973236	0.0145012	0.552141	0.655668	0.362209	0.458798	1.06127e-06	7.20146e-06
MAP2K1	0.00325325	0.00851582	0.00367363	0.0261605	0.0767841	0.0411247	0.0813927	0.606795	0.72969
ALK	0.00358692	0.00851582	0.00438257	0.0392224	0.100706	0.103275	0.178384	0.337801	0.486229
PMS2	0.00417084	0.00851582	0.00373808	0.0936277	0.18351	0.0441742	0.0865269	0.627093	0.749356
MET	0.00433767	0.00851582	0.00592936	0.10206	0.195874	0.349688	0.448924	0.0767079	0.147217
ARAF	0.00525526	0.00851582	0.00348028	0.216254	0.326097	0.0328097	0.0677591	0.0312132	0.0697707
PBRM1	0.00633967	0.00851582	0.0080562	0.494825	0.617623	0.840496	0.907353	0.100929	0.184389
STAG2	0.00642309	0.00851582	0.00915184	0.497349	0.617623	1	1	0.0113705	0.0295944
CDKN1B	0.0121788	0.00851582	0.0169502	0.503982	0.621796	0.0670614	0.122516	0.00127762	0.00458013
TNFAIP3	0.00233567	0.00729927	0.00180459	0.0196797	0.0623191	0.00639612	0.0191782	0.347421	0.492612
QKI	0.00283617	0.00729927	0.00244908	0.0406715	0.103034	0.0219932	0.0497465	0.553337	0.700893
SF3B1	0.0165999	0.00729927	0.0191415	0.042499	0.106248	0.0109606	0.0289239	0.120392	0.2118
AXL	0.00333667	0.00729927	0.00257798	0.0721154	0.153918	0.0268333	0.0592828	0.26007	0.395306
VHL	0.00375375	0.00729927	0.00380253	0.140285	0.24231	0.142477	0.22189	1	1
NBN	0.00408742	0.00729927	0.00470482	0.165034	0.275057	0.293626	0.387423	0.465384	0.609814
PRDM1	0.00500501	0.00729927	0.00328693	0.316868	0.439452	0.0657765	0.121335	0.0274486	0.0636004
TET2	0.011011	0.00729927	0.0139856	0.38508	0.511645	0.122017	0.196724	0.0297644	0.0673242
NF2	0.00717384	0.00729927	0.00534932	0.83263	0.899636	0.458755	0.555181	0.0616255	0.125902
IKZF1	0.000834168	0.00608273	0.00135344	0.00187793	0.0118936	0.00867197	0.0243988	0.276677	0.417211
RAD51D	0.00166834	0.00608273	0.00212684	0.0195028	0.0623191	0.0404423	0.0808847	0.409304	0.54766
RBM10	0.00183517	0.00608273	0.00373808	0.0266724	0.0767841	0.248266	0.344311	0.00445438	0.0136505
JAK1	0.00183517	0.00608273	0.000966744	0.0266724	0.0767841	0.00262341	0.00958555	0.0667984	0.132852
INPP4B	0.00275275	0.00608273	0.00290023	0.0936864	0.18351	0.105369	0.179135	0.909075	0.969964
CRKL	0.00308642	0.00608273	0.00502707	0.190886	0.304777	0.611639	0.700069	0.0140984	0.0357159
AMER1	0.00325325	0.00608273	0.00373808	0.203133	0.316354	0.248266	0.344311	0.539161	0.687521
EPHA3	0.0110944	0.00608273	0.00986079	0.220827	0.327789	0.360385	0.458798	0.337615	0.486229
CBL	0.00392059	0.00608273	0.00380253	0.384261	0.511645	0.255467	0.346705	0.921917	0.969964
FGFR3	0.00425425	0.00608273	0.00631606	0.406868	0.533138	1	1	0.024989	0.0593488
CTCF	0.00567234	0.00608273	0.00625161	0.809601	0.889157	1	1	0.581746	0.713108
CASP8	0.00734067	0.00608273	0.00670276	0.833347	0.899636	1	1	0.559255	0.703698
CTNNB1	0.00617284	0.00608273	0.00489817	1	1	0.605265	0.696972	0.160973	0.263663
REL	0.00658992	0.00608273	0.00367363	1	1	0.241297	0.339603	0.000694198	0.00274787
EZH2	0.00617284	0.00608273	0.00534932	1	1	0.804022	0.872938	0.375628	0.520943
SMO	0.000917584	0.00486618	0.000708946	0.012995	0.0480147	0.00556169	0.017612	0.668088	0.788427
TERT	0.0147648	0.00486618	0.0105697	0.014055	0.0485537	0.151964	0.229152	0.00205585	0.00685282
PTPN11	0.00125125	0.00486618	0.00367363	0.0301048	0.0841163	0.549581	0.652627	6.75348e-05	0.00029841
CBFB	0.0130964	0.00486618	0.0172725	0.0350113	0.0936921	0.00308493	0.0108544	0.00571568	0.0167074
MAP3K13	0.00191859	0.00486618	0.00232019	0.0913382	0.182676	0.140177	0.221683	0.513109	0.663202
PRKAR1A	0.00208542	0.00486618	0.00219129	0.112002	0.204618	0.122176	0.196724	0.896014	0.969964
SUFU	0.00216884	0.00486618	0.00174014	0.123042	0.220548	0.0681779	0.123369	0.488549	0.635782
ABL1	0.00225225	0.00486618	0.00193349	0.134525	0.234493	0.089483	0.15598	0.59423	0.719132
SMARCB1	0.00266934	0.00486618	0.00238464	0.289198	0.408914	0.149551	0.227318	0.715662	0.814226
MRE11	0.00266934	0.00486618	0.00225574	0.289198	0.408914	0.131048	0.209236	0.537992	0.687521
MTOR	0.00283617	0.00486618	0.00444702	0.3052	0.426382	0.786145	0.863396	0.0360797	0.0787947
SDHA	0.00325325	0.00486618	0.00348028	0.354468	0.477652	0.537287	0.642041	0.834214	0.926904
MEN1	0.00750751	0.00486618	0.0142434	0.526225	0.644539	0.0201266	0.0460729	1.01849e-07	8.41359e-07
KEAP1	0.00383717	0.00486618	0.00522042	0.561104	0.658085	1	1	0.106213	0.190382
HRAS	0.00725726	0.00486618	0.00547822	0.664461	0.755974	1	1	0.0645674	0.130508
GATA6	0.00442109	0.00486618	0.00393143	0.784426	0.876712	0.569213	0.667596	0.570456	0.706878
MYB	0.00458792	0.00486618	0.00373808	0.790265	0.876777	0.554175	0.653995	0.296097	0.436112
BCL2	0.00558892	0.00486618	0.00489817	1	1	1	1	0.447327	0.592554

## Sheet: FDR ER+
Prevalence of ER+ >0.5%: Genes with prevalence more than 0.5% in any cohort and Benjamini-Hochberg p-value
Gene	% var local	% var brain met	% var other met	pval brain met vs BC	Benjamini-Hochberg P-value BM vs BC	pval brain met vs other met	Benjamini-Hochberg P-value BM vs Other Met	pval other met vs BC	Benjamini-Hochberg P-value Other Met vs BC
ESR1	0.0496552	0.147482	0.317716	9.40169e-07	0.00016829	2.51343e-08	2.24952e-06	4.72843e-42	8.46389e-40
CDH1	0.062069	0.0647482	0.143485	0.884776	1	0.000451564	0.0269433	3.8783e-07	3.47108e-05
FGF3	0.175172	0.208633	0.281113	0.23722	0.765703	0.023037	0.454911	2.28786e-06	0.000136509
FGF4	0.175172	0.21223	0.27672	0.174924	0.691415	0.0420481	0.454911	5.42122e-06	0.000242599
FGF19	0.182069	0.21223	0.284041	0.281865	0.835742	0.0236585	0.454911	6.792e-06	0.000243154
TP53	0.462069	0.464029	0.345534	1	1	0.000735214	0.0329008	1.06284e-05	0.000317081
CCND1	0.202759	0.23741	0.298682	0.228642	0.757905	0.0577679	0.454911	3.5374e-05	0.000904564
MEN1	0.00275862	0.00359712	0.0219619	1	1	0.0501741	0.454911	0.000937839	0.0209841
EMSY	0.0648276	0.0827338	0.106881	0.333378	0.840489	0.286853	0.654993	0.00547988	0.108989
BRIP1	0.017931	0.0107914	0.00292826	0.577243	0.944655	0.148635	0.524786	0.00745701	0.117817
PRDM1	0.0110345	0.00719424	0	0.73521	0.982109	0.0834699	0.465459	0.007851	0.117817
PARP1	0.0248276	0.0251799	0.0527086	1	1	0.0835631	0.465459	0.00789837	0.117817
BCL2	0.00137931	0.00719424	0.011713	0.187614	0.691415	0.732494	0.936546	0.0179195	0.237587
AKT3	0.0193103	0.0179856	0.0409956	1	1	0.0810121	0.465459	0.0185823	0.237587
BRAF	0.00965517	0.0107914	0.0263543	1	1	0.152452	0.524786	0.024635	0.278814
ZNF703	0.182069	0.230216	0.231332	0.0912127	0.529675	1	1	0.0249219	0.278814
ARID1A	0.0565517	0.0755396	0.0863836	0.30466	0.835742	0.69933	0.931301	0.0374368	0.361007
NF1	0.0441379	0.0683453	0.0702782	0.147114	0.658337	1	1	0.0380699	0.361007
PIK3CA	0.369655	0.348921	0.424597	0.558217	0.944655	0.0353237	0.454911	0.0383191	0.361007
NOTCH1	0.022069	0.0251799	0.00878477	0.81427	1	0.0622187	0.454911	0.0529326	0.44847
NF2	0	0.0107914	0.00585652	0.0211267	0.398969	0.419221	0.721544	0.0551192	0.44847
CSF1R	0	0.00719424	0.00585652	0.0766224	0.522176	1	1	0.0551192	0.44847
ATRX	0.0124138	0.0143885	0.00292826	0.761709	0.995226	0.0616912	0.454911	0.0656888	0.51123
ERBB2	0.132414	0.258993	0.101025	4.65339e-06	0.000416478	2.61391e-09	4.6789e-07	0.0687555	0.512801
PRKCI	0.0165517	0.0179856	0.00585652	0.792107	1	0.130782	0.508914	0.0772301	0.5317
KMT2D	0.0165517	0.0143885	0.00585652	1	1	0.23855	0.588572	0.0772301	0.5317
CHEK2	0.0289655	0.0179856	0.0468521	0.383045	0.861274	0.0406268	0.454911	0.092452	0.59154
BCL2L1	0.0137931	0.00719424	0.00439239	0.527359	0.938316	0.630355	0.917345	0.092661	0.59154
TERC	0.017931	0.0215827	0.00732064	0.795974	1	0.0884113	0.465459	0.0967868	0.59154
PIK3CB	0.00275862	0.0215827	0.0102489	0.00717637	0.230442	0.215492	0.567251	0.0991408	0.59154
JUN	0	0.0143885	0.00439239	0.00580983	0.230442	0.111763	0.508049	0.113886	0.608419
RBM10	0	0.0107914	0.00439239	0.0211267	0.398969	0.363638	0.664196	0.113886	0.608419
PTPN11	0.00137931	0.00719424	0.00732064	0.187614	0.691415	1	1	0.113982	0.608419
BRCA1	0.0372414	0.0395683	0.0219619	0.854491	1	0.130166	0.508914	0.116357	0.608419
MYCL	0.0151724	0.00719424	0.00585652	0.532903	0.938316	1	1	0.118965	0.608419
NFKBIA	0.0193103	0.0179856	0.0322108	1	1	0.284691	0.654993	0.131995	0.638845
SMAD4	0.00689655	0.0251799	0.0161054	0.0245177	0.398969	0.430356	0.733655	0.132052	0.638845
TBX3	0.0303448	0.057554	0.045388	0.0625039	0.522176	0.414215	0.721544	0.161373	0.71617
MLH1	0.00275862	0.00359712	0.00878477	1	1	0.680167	0.931301	0.166897	0.71617
MYCN	0.00275862	0.0107914	0.00878477	0.13368	0.627514	0.723189	0.931301	0.166897	0.71617
APC	0.017931	0.00719424	0.00878477	0.25903	0.813445	1	1	0.167802	0.71617
FGFR1	0.169655	0.183453	0.199122	0.641472	0.981397	0.653282	0.931301	0.168717	0.71617
GATA3	0.136552	0.172662	0.162518	0.162554	0.691415	0.702502	0.931301	0.17846	0.71617
CD274	0.00965517	0.0107914	0.00292826	1	1	0.148635	0.524786	0.180043	0.71617
FBXW7	0.00965517	0.00359712	0.00292826	0.455994	0.906921	1	1	0.180043	0.71617
NTRK1	0.00689655	0.0215827	0.0146413	0.0816812	0.522176	0.418313	0.721544	0.196977	0.766496
FGF10	0.00137931	0.0143885	0.00585652	0.0226752	0.398969	0.23855	0.588572	0.204925	0.780306
SF3B1	0.0206897	0.0143885	0.011713	0.61344	0.958322	0.752302	0.951384	0.211003	0.780306
MAP2K4	0.0510345	0.0971223	0.0673499	0.00942335	0.240969	0.138861	0.517836	0.213603	0.780306
MSH2	0.00689655	0.00719424	0.00146413	1	1	0.202364	0.557777	0.219003	0.784032
GNAS	0.0855172	0.122302	0.0673499	0.092562	0.529675	0.00672327	0.240693	0.229264	0.789335
PTEN	0.097931	0.118705	0.118594	0.354909	0.8586	1	1	0.229304	0.789335
KRAS	0.0275862	0.0359712	0.0395315	0.534683	0.938316	0.855725	1	0.236508	0.791116
VEGFA	0.0165517	0.0107914	0.00878477	0.771608	1	0.723189	0.931301	0.238661	0.791116
MDM2	0.0606897	0.0611511	0.0775988	1	1	0.413925	0.721544	0.246779	0.794053
MYC	0.204138	0.226619	0.178624	0.437017	0.888932	0.104079	0.508049	0.24958	0.794053
FAS	0.00551724	0.0215827	0.011713	0.031875	0.438894	0.246608	0.588572	0.252855	0.794053
HGF	0.0124138	0.0215827	0.00585652	0.381392	0.861274	0.0391106	0.454911	0.267417	0.822317
AMER1	0.00275862	0.00359712	0.00732064	1	1	0.678687	0.931301	0.274617	0.822317
PALB2	0.00689655	0.0323741	0.0131772	0.0043892	0.230442	0.063535	0.454911	0.287684	0.822317
KIT	0.00827586	0.0143885	0.00292826	0.476897	0.915318	0.0616912	0.454911	0.289419	0.822317
SETD2	0.00827586	0.0143885	0.00292826	0.476897	0.915318	0.0616912	0.454911	0.289419	0.822317
PDCD1LG2	0.00827586	0.00719424	0.00292826	1	1	0.329326	0.654993	0.289419	0.822317
CCND2	0.0137931	0.00719424	0.00732064	0.527359	0.938316	1	1	0.302428	0.845852
FGFR4	0.00827586	0.0107914	0.0146413	0.713912	0.982109	0.766723	0.95308	0.318306	0.876566
ATR	0.00965517	0.0143885	0.00439239	0.508779	0.938316	0.111763	0.508049	0.344197	0.92537
ABL1	0.00137931	0.0107914	0.00439239	0.0670772	0.522176	0.363638	0.664196	0.360202	0.92537
EPHA3	0.00137931	0.0107914	0.00439239	0.0670772	0.522176	0.363638	0.664196	0.360202	0.92537
TSC1	0.00551724	0.0107914	0.0102489	0.403723	0.861274	1	1	0.37365	0.92537
EPHB1	0.00551724	0.00719424	0.00146413	0.671463	0.982109	0.202364	0.557777	0.375226	0.92537
FANCL	0.00551724	0.00359712	0.00146413	1	1	0.495094	0.805653	0.375226	0.92537
REL	0.00551724	0.00359712	0.00146413	1	1	0.495094	0.805653	0.375226	0.92537
LYN	0.0413793	0.0359712	0.0527086	0.857115	1	0.319504	0.654993	0.377386	0.92537
CDK12	0.0193103	0.0323741	0.0131772	0.239549	0.765703	0.063535	0.454911	0.405886	0.926855
EGFR	0.0193103	0.0179856	0.0131772	1	1	0.561172	0.881139	0.405886	0.926855
MAP3K1	0.0593103	0.0431655	0.0483163	0.355673	0.8586	0.866571	1	0.409277	0.926855
AKT2	0.00689655	0.0215827	0.011713	0.0816812	0.522176	0.246608	0.588572	0.410326	0.926855
MSH6	0.00275862	0.0143885	0.00585652	0.0532627	0.522176	0.23855	0.588572	0.439319	0.926855
MAP2K2	0.00275862	0	0.00585652	1	1	0.583823	0.88563	0.439319	0.926855
CRKL	0.00275862	0.00719424	0.00585652	0.308151	0.835742	1	1	0.439319	0.926855
RAD51B	0.00275862	0.00359712	0.00585652	1	1	1	1	0.439319	0.926855
VHL	0.00275862	0.00359712	0.00585652	1	1	1	1	0.439319	0.926855
MCL1	0.0524138	0.057554	0.0424597	0.755486	0.995226	0.31575	0.654993	0.452622	0.926855
ACVR1B	0.00689655	0.0143885	0.00292826	0.272277	0.835742	0.0616912	0.454911	0.453422	0.926855
STAG2	0.0137931	0	0.00878477	0.0701436	0.522176	0.189751	0.557777	0.455173	0.926855
CCND3	0.0137931	0.00719424	0.00878477	0.527359	0.938316	1	1	0.455173	0.926855
IKBKE	0.0289655	0.0395683	0.0366032	0.422863	0.870029	0.851957	1	0.455519	0.926855
RB1	0.0441379	0.057554	0.0527086	0.408738	0.861274	0.754729	0.951384	0.458911	0.926855
PIK3R1	0.017931	0.028777	0.0248902	0.324158	0.840489	0.823305	0.989071	0.460839	0.926855
ASXL1	0.00965517	0.0179856	0.0146413	0.329913	0.840489	0.774983	0.956703	0.467949	0.930699
KDM5A	0.0248276	0.0215827	0.0190337	1	1	0.800613	0.968308	0.474435	0.93323
MRE11	0	0.00719424	0.00146413	0.0766224	0.522176	0.202364	0.557777	0.485085	0.943807
BCOR	0.00413793	0	0.00732064	0.564849	0.944655	0.329202	0.654993	0.494991	0.952725
SMARCA4	0.00827586	0.0107914	0.00439239	0.713912	0.982109	0.363638	0.664196	0.508171	0.957501
CTNNA1	0.00827586	0.00359712	0.00439239	0.680525	0.982109	1	1	0.508171	0.957501
ERBB3	0.017931	0.0359712	0.0131772	0.0999652	0.529675	0.0368324	0.454911	0.524328	0.970701
CDKN1B	0.0137931	0.0107914	0.0190337	1	1	0.57832	0.88563	0.529742	0.970701
ERBB4	0.00551724	0.0215827	0.00878477	0.031875	0.438894	0.116369	0.508049	0.536868	0.970701
PBRM1	0.00551724	0.0107914	0.00878477	0.403723	0.861274	0.723189	0.931301	0.536868	0.970701
IRS2	0.00965517	0.0179856	0.00585652	0.329913	0.840489	0.130782	0.508914	0.54924	0.98314
CDK4	0.022069	0.028777	0.0175695	0.49804	0.938316	0.318348	0.654993	0.572614	1
SOX2	0.0110345	0.0179856	0.00732064	0.364545	0.8586	0.163587	0.542259	0.581516	1
IGF1R	0.0372414	0.028777	0.0439239	0.570672	0.944655	0.361456	0.664196	0.58905	1
RICTOR	0.00827586	0.0215827	0.011713	0.103568	0.529675	0.246608	0.588572	0.596659	1
JAK2	0.0124138	0.0143885	0.00878477	0.761709	0.995226	0.486795	0.805653	0.607745	1
NBN	0.00137931	0.00719424	0.00292826	0.187614	0.691415	0.329326	0.654993	0.613867	1
PIK3C2B	0.0524138	0.0683453	0.045388	0.36065	0.8586	0.151502	0.524786	0.62161	1
ETV6	0.00413793	0.00719424	0.00146413	0.621035	0.958322	0.202364	0.557777	0.625135	1
TET2	0.0137931	0	0.0102489	0.0701436	0.522176	0.202545	0.557777	0.629608	1
CBFB	0.0110345	0.00719424	0.0146413	0.73521	0.982109	0.525246	0.839695	0.638073	1
ATM	0.0289655	0.0395683	0.033675	0.422863	0.870029	0.700664	0.931301	0.647874	1
DNMT3A	0.0137931	0.00359712	0.0175695	0.30712	0.835742	0.123713	0.508914	0.668931	1
MET	0.00275862	0.00719424	0.00439239	0.308151	0.835742	0.630355	0.917345	0.678268	1
PRKN	0.00551724	0.00719424	0.00292826	0.671463	0.982109	0.329326	0.654993	0.68767	1
PDGFRA	0.00551724	0.00719424	0.00292826	0.671463	0.982109	0.329326	0.654993	0.68767	1
PMS2	0.00551724	0.00719424	0.00292826	0.671463	0.982109	0.329326	0.654993	0.68767	1
GRM3	0.00551724	0	0.00292826	0.580515	0.944655	1	1	0.68767	1
MDM4	0.0413793	0.0647482	0.0468521	0.136721	0.627514	0.26436	0.622638	0.696993	1
NOTCH2	0.022069	0.0143885	0.0190337	0.614756	0.958322	0.789898	0.961849	0.711838	1
EZH2	0.00413793	0	0.00585652	0.564849	0.944655	0.583823	0.88563	0.718524	1
HRAS	0.00413793	0.00359712	0.00585652	1	1	1	1	0.718524	1
BCORL1	0.00689655	0.0107914	0.00439239	0.692072	0.982109	0.363638	0.664196	0.726762	1
ARFRP1	0.057931	0.0863309	0.0629575	0.117431	0.583891	0.209479	0.567251	0.737497	1
FGF12	0.00827586	0.0179856	0.00585652	0.18927	0.691415	0.130782	0.508914	0.754131	1
EPHB4	0.00827586	0.0107914	0.00585652	0.713912	0.982109	0.419221	0.721544	0.754131	1
CASP8	0.00689655	0.00359712	0.00878477	1	1	0.680167	0.931301	0.767849	1
KEL	0.00965517	0.0179856	0.00732064	0.329913	0.840489	0.163587	0.542259	0.774662	1
FGF6	0.00965517	0.0107914	0.00732064	1	1	0.69693	0.931301	0.774662	1
FGF23	0.00965517	0.00719424	0.00732064	1	1	1	1	0.774662	1
FLT3	0.00827586	0.0143885	0.0102489	0.476897	0.915318	0.525396	0.839695	0.784463	1
RAF1	0.00827586	0.00719424	0.0102489	1	1	1	1	0.784463	1
KDM6A	0.0110345	0.0107914	0.00878477	1	1	0.723189	0.931301	0.790797	1
CUL4A	0.0110345	0.00719424	0.00878477	0.73521	0.982109	1	1	0.790797	1
CDKN2B	0.0413793	0.0431655	0.045388	0.861857	1	1	1	0.793661	1
CREBBP	0.0124138	0.0215827	0.0102489	0.381392	0.861274	0.215492	0.567251	0.80391	1
RPTOR	0.0137931	0.0215827	0.011713	0.401679	0.861274	0.246608	0.588572	0.814839	1
SRC	0.0165517	0.028777	0.0146413	0.21487	0.739649	0.186727	0.557777	0.832158	1
ZNF217	0.102069	0.133094	0.0980966	0.177179	0.691415	0.13603	0.517836	0.859104	1
CDKN2A	0.0565517	0.0647482	0.0585652	0.653292	0.982109	0.765286	0.95308	0.909105	1
AURKA	0.0662069	0.0827338	0.0644217	0.408985	0.861274	0.329009	0.654993	0.914445	1
FGFR2	0.017931	0.0503597	0.0190337	0.00772431	0.230442	0.0156381	0.454911	1	1
PRKAR1A	0.00137931	0.0107914	0	0.0670772	0.522176	0.0240226	0.454911	1	1
KDM5C	0.00551724	0.0179856	0.00439239	0.12547	0.607004	0.0493043	0.454911	1	1
BARD1	0.00275862	0.0143885	0.00292826	0.0532627	0.522176	0.0616912	0.454911	1	1
FANCG	0.00137931	0.0107914	0.00146413	0.0670772	0.522176	0.075403	0.465459	1	1
MYB	0.00137931	0.0107914	0.00146413	0.0670772	0.522176	0.075403	0.465459	1	1
FGF14	0	0.00719424	0	0.0766224	0.522176	0.0834699	0.465459	1	1
ROS1	0.00827586	0.0215827	0.00732064	0.103568	0.529675	0.0884113	0.465459	1	1
SOX9	0.00827586	0.0215827	0.00732064	0.103568	0.529675	0.0884113	0.465459	1	1
MAP2K1	0.00413793	0.0143885	0.00439239	0.0976254	0.529675	0.111763	0.508049	1	1
KDR	0.00551724	0.0143885	0.00439239	0.227629	0.757905	0.111763	0.508049	1	1
EP300	0.00965517	0.0215827	0.00878477	0.207157	0.727081	0.116369	0.508049	1	1
STK11	0.0151724	0.028777	0.0146413	0.193738	0.693581	0.186727	0.557777	1	1
FH	0.00137931	0.00719424	0.00146413	0.187614	0.691415	0.202364	0.557777	1	1
TNFAIP3	0.00137931	0.00719424	0.00146413	0.187614	0.691415	0.202364	0.557777	1	1
JAK1	0.00275862	0.00719424	0.00146413	0.308151	0.835742	0.202364	0.557777	1	1
SPEN	0.0262069	0.0395683	0.0263543	0.300302	0.835742	0.299927	0.654993	1	1
QKI	0.00275862	0.00719424	0.00292826	0.308151	0.835742	0.329326	0.654993	1	1
FANCC	0.00413793	0.0107914	0.00439239	0.355912	0.8586	0.363638	0.664196	1	1
CDK8	0.00551724	0.0107914	0.00439239	0.403723	0.861274	0.363638	0.664196	1	1
CDK6	0.00689655	0.0107914	0.00585652	0.692072	0.982109	0.419221	0.721544	1	1
CCNE1	0.0206897	0.028777	0.0204978	0.48067	0.915318	0.476787	0.80514	1	1
BRD4	0.00965517	0.0143885	0.00878477	0.508779	0.938316	0.486795	0.805653	1	1
PTCH1	0.00551724	0	0.00439239	0.580515	0.944655	0.560906	0.881139	1	1
AR	0.00551724	0	0.00585652	0.580515	0.944655	0.583823	0.88563	1	1
AKT1	0.0455172	0.0359712	0.045388	0.60289	0.958322	0.599695	0.902063	1	1
CIC	0.00413793	0.00719424	0.00439239	0.621035	0.958322	0.630355	0.917345	1	1
RNF43	0.00413793	0.00719424	0.00439239	0.621035	0.958322	0.630355	0.917345	1	1
BAP1	0.00965517	0.00359712	0.00878477	0.455994	0.906921	0.680167	0.931301	1	1
NRAS	0.00827586	0.00359712	0.00878477	0.680525	0.982109	0.680167	0.931301	1	1
TSC2	0.00827586	0.0107914	0.00732064	0.713912	0.982109	0.69693	0.931301	1	1
BCL2L2	0.00965517	0.0107914	0.00878477	1	1	0.723189	0.931301	1	1
NKX2-1	0.017931	0.0143885	0.0190337	1	1	0.789898	0.961849	1	1
BRCA2	0.0551724	0.057554	0.0541728	0.878519	1	0.876336	1	1	1
FANCA	0.0110345	0.00719424	0.0102489	0.73521	0.982109	1	1	1	1
MUTYH	0.0151724	0.0143885	0.0161054	1	1	1	1	1	1
NOTCH3	0.0137931	0.0107914	0.0131772	1	1	1	1	1	1
RET	0.00827586	0.00719424	0.00732064	1	1	1	1	1	1
CTCF	0.00551724	0.00359712	0.00439239	1	1	1	1	1	1

## Sheet: FDR HER2+ 
Prevalence of HER2+ >0.5%: Genes with prevalence more than 0.5% in any cohort and Benjamini-Hochberg p-value
Gene	% var local	% var brain met	% var other met	pval brain met vs BC	Benjamini-Hochberg P-value BM vs BC	pval brain met vs other met	Benjamini-Hochberg P-value BM vs Other Met	pval other met vs BC	Benjamini-Hochberg P-value Other Met vs BC
ERBB2	0.999093	1	1	1	1	1	1	0.479965	1
TP53	0.680581	0.697297	0.701843	0.670526	1	0.931247	1	0.277913	0.961973
PIK3CA	0.360254	0.324324	0.376884	0.362095	0.925353	0.190348	0.842451	0.411218	1
MYC	0.26225	0.254054	0.271357	0.856778	1	0.656775	1	0.63698	1
CCND1	0.186025	0.162162	0.19933	0.472964	0.982309	0.271986	0.842451	0.427637	1
FGF19	0.168784	0.151351	0.191792	0.595242	1	0.223095	0.842451	0.158377	0.855237
FGF4	0.15971	0.145946	0.178392	0.743593	1	0.299113	0.869729	0.242545	0.95767
CDK12	0.0862069	0.145946	0.0854271	0.0142112	0.418058	0.0137996	0.56427	1	1
FGF3	0.15971	0.140541	0.184255	0.585109	1	0.179216	0.842451	0.121983	0.85412
ZNF703	0.106171	0.108108	0.144054	0.89798	1	0.210139	0.842451	0.00673143	0.307148
FGFR1	0.0916515	0.102703	0.123953	0.58743	1	0.468305	0.968648	0.013001	0.307148
GNAS	0.0970962	0.0972973	0.100503	1	1	1	1	0.83378	1
ZNF217	0.106171	0.0810811	0.110553	0.359299	0.925353	0.25114	0.842451	0.788227	1
MAP2K4	0.0499093	0.0756757	0.0552764	0.157818	0.812002	0.308309	0.882886	0.576337	1
GATA3	0.0707804	0.0702703	0.0703518	1	1	1	1	1	1
CDKN2A	0.0499093	0.0648649	0.0711893	0.37374	0.925353	0.877496	1	0.0360991	0.758081
CDKN2B	0.0335753	0.0648649	0.0469012	0.0579611	0.812002	0.27636	0.842451	0.112647	0.85412
LYN	0.0435572	0.0648649	0.0544389	0.191243	0.896301	0.604527	0.987678	0.247156	0.95767
ARID1A	0.0490018	0.0648649	0.041876	0.367488	0.925353	0.17939	0.842451	0.423313	1
MCL1	0.0898367	0.0648649	0.0812395	0.321762	0.925353	0.5576	0.987678	0.501221	1
CCNE1	0.0644283	0.0648649	0.0678392	1	1	1	1	0.80113	1
AURKA	0.0725953	0.0594595	0.0896147	0.641917	1	0.203814	0.842451	0.146945	0.855237
ARFRP1	0.0626134	0.0540541	0.080402	0.742741	1	0.237769	0.842451	0.105968	0.85412
PIK3C2B	0.0780399	0.0540541	0.061139	0.291622	0.925353	0.867987	1	0.118269	0.85412
EMSY	0.0526316	0.0540541	0.0678392	0.860459	1	0.632323	0.987678	0.136778	0.855237
AKT2	0.0290381	0.0540541	0.0217755	0.112347	0.812002	0.0212405	0.573493	0.288683	0.961973
NF1	0.0680581	0.0486486	0.0762144	0.4205	0.957524	0.22229	0.842451	0.468703	1
ATM	0.0290381	0.0432432	0.020938	0.355698	0.925353	0.0718274	0.80045	0.228736	0.95767
CDH1	0.0426497	0.0432432	0.0519263	1	1	0.721111	1	0.326377	1
TBX3	0.0263158	0.0432432	0.0326633	0.229956	0.917246	0.510812	0.981113	0.390634	1
ROS1	0.0145191	0.0432432	0.019263	0.0147043	0.418058	0.0566819	0.80045	0.421469	1
KRAS	0.0235935	0.0432432	0.0268007	0.134899	0.812002	0.235119	0.842451	0.690344	1
MAP3K1	0.0317604	0.0432432	0.0284757	0.381478	0.925353	0.254739	0.842451	0.71397	1
MDM4	0.0653358	0.0432432	0.0619765	0.322793	0.925353	0.403382	0.930875	0.797452	1
IKBKE	0.0399274	0.0432432	0.0410385	0.839735	1	0.843183	1	0.915967	1
SRC	0.0190563	0.0378378	0.0276382	0.106713	0.812002	0.476636	0.968648	0.214616	0.95767
MDM2	0.0462795	0.0378378	0.0552764	0.705293	1	0.381542	0.924505	0.343372	1
TERC	0.0362976	0.0378378	0.0335008	0.834162	1	0.668213	1	0.733762	1
CDK4	0.03902	0.0378378	0.0410385	1	1	1	1	0.831954	1
RPTOR	0.0281307	0.0378378	0.0276382	0.479468	0.984994	0.476636	0.968648	1	1
ESR1	0.0344828	0.0324324	0.0988275	1	1	0.00210516	0.397874	4.35504e-10	8.23103e-08
FGFR4	0.00725953	0.0324324	0.0251256	0.00897902	0.418058	0.617374	0.987678	0.000834765	0.0788853
CCND2	0.00635209	0.0324324	0.0134003	0.00581565	0.418058	0.103979	0.80045	0.0975184	0.852368
FGF6	0.00635209	0.0324324	0.0134003	0.00581565	0.418058	0.103979	0.80045	0.0975184	0.852368
PRKCI	0.022686	0.0324324	0.0268007	0.434153	0.975645	0.629576	0.987678	0.592019	1
FGF23	0.00635209	0.027027	0.0134003	0.0195939	0.462906	0.186791	0.842451	0.0975184	0.852368
FGF10	0.0117967	0.027027	0.0184255	0.16326	0.812002	0.394714	0.930875	0.233539	0.95767
JUN	0.0199637	0.027027	0.0259631	0.575717	1	0.808308	1	0.404327	1
PARP1	0.0353902	0.027027	0.0410385	0.667439	1	0.539076	0.987678	0.514906	1
KDR	0.0181488	0.027027	0.020938	0.389576	0.932023	0.586334	0.987678	0.654288	1
NOTCH3	0.0263158	0.027027	0.0293132	1	1	1	1	0.704582	1
KIT	0.0199637	0.027027	0.0175879	0.575717	1	0.37995	0.924505	0.75854	1
RB1	0.0344828	0.027027	0.0326633	0.824575	1	0.824517	1	0.817615	1
PRKN	0.00544465	0.027027	0.00502513	0.0129092	0.418058	0.00962369	0.56427	1	1
RAF1	0.00725953	0.0216216	0.0142379	0.0802544	0.812002	0.512173	0.981113	0.157577	0.855237
GID4	0.0163339	0.0216216	0.0108878	0.543716	1	0.269424	0.842451	0.281569	0.961973
BCORL1	0.00544465	0.0216216	0.00251256	0.0428979	0.737063	0.007905	0.56427	0.326351	1
IRS2	0.00544465	0.0216216	0.00837521	0.0428979	0.737063	0.106184	0.80045	0.4588	1
NOTCH1	0.0127042	0.0216216	0.0167504	0.312614	0.925353	0.551688	0.987678	0.490715	1
NTRK1	0.0181488	0.0216216	0.0217755	0.767186	1	1	1	0.554833	1
NFKBIA	0.0299456	0.0216216	0.0351759	0.641546	1	0.507034	0.981113	0.557154	1
VEGFA	0.0127042	0.0216216	0.0108878	0.312614	0.925353	0.269424	0.842451	0.703211	1
MYCL	0.0199637	0.0216216	0.0184255	0.780942	1	0.769736	1	0.879189	1
MYCN	0.0190563	0.0216216	0.0201005	0.773562	1	0.782698	1	0.881382	1
PALB2	0.00544465	0.0216216	0.00586265	0.0428979	0.737063	0.0482215	0.80045	1	1
ATR	0.00998185	0.0216216	0.00921273	0.253527	0.917246	0.1303	0.80045	1	1
PTEN	0.030853	0.0162162	0.0469012	0.346949	0.925353	0.0520631	0.80045	0.0526454	0.852368
FGF12	0.00544465	0.0162162	0.0125628	0.127064	0.812002	0.72385	1	0.0819868	0.852368
FLT3	0.00635209	0.0162162	0.0134003	0.163135	0.812002	0.732861	1	0.0975184	0.852368
AKT3	0.0217786	0.0162162	0.0335008	0.786588	1	0.260159	0.842451	0.0992175	0.852368
PIK3R1	0.0136116	0.0162162	0.0217755	0.734831	1	0.787764	1	0.157183	0.855237
KEL	0.00907441	0.0162162	0.0150754	0.41563	0.957524	0.754311	1	0.253352	0.95767
CDK6	0.0163339	0.0162162	0.0226131	1	1	0.787946	1	0.295209	0.961973
RICTOR	0.0263158	0.0162162	0.0326633	0.609265	1	0.35412	0.892383	0.390634	1
BRIP1	0.0217786	0.0162162	0.0167504	0.786588	1	1	1	0.446819	1
EP300	0.00907441	0.0162162	0.00586265	0.41563	0.957524	0.139761	0.80045	0.467062	1
SPEN	0.0181488	0.0162162	0.0142379	1	1	0.743119	1	0.508913	1
CHEK2	0.0245009	0.0162162	0.0293132	0.790806	1	0.467174	0.968648	0.520642	1
CTNNA1	0.00635209	0.0162162	0.0041876	0.163135	0.812002	0.0796804	0.80045	0.568077	1
AR	0.0145191	0.0162162	0.0167504	0.746373	1	1	1	0.738019	1
SOX9	0.00453721	0.0162162	0.00586265	0.0943496	0.812002	0.139761	0.80045	0.776002	1
EGFR	0.0281307	0.0162162	0.0259631	0.462148	0.975645	0.610611	0.987678	0.797247	1
TET2	0.0108893	0.0162162	0.0125628	0.464593	0.975645	0.72385	1	0.846876	1
JAK2	0.0136116	0.0162162	0.0125628	0.734831	1	0.72385	1	0.85583	1
PDGFRA	0.0136116	0.0162162	0.0150754	0.734831	1	0.754311	1	0.861312	1
AKT1	0.0163339	0.0162162	0.0175879	1	1	1	1	0.872446	1
RET	0.0190563	0.0162162	0.0201005	1	1	1	1	0.881382	1
FGFR2	0.0163339	0.0162162	0.0159129	1	1	1	1	1	1
PMS2	0.00362976	0.0108108	0	0.208663	0.896301	0.0179133	0.56427	0.0529185	0.852368
CBFB	0.00362976	0.0108108	0.0100503	0.208663	0.896301	1	1	0.0795421	0.852368
STK11	0.0108893	0.0108108	0.0041876	1	1	0.239302	0.842451	0.0861049	0.852368
MRE11	0.00635209	0.0108108	0.00167504	0.625221	1	0.0893795	0.80045	0.096934	0.852368
RAD51B	0.000907441	0.0108108	0.00502513	0.0558429	0.812002	0.292509	0.863815	0.126536	0.85412
BAP1	0.00272232	0.0108108	0.00753769	0.153083	0.812002	0.649769	0.998425	0.148827	0.855237
FANCC	0.00544465	0.0108108	0.00167504	0.322991	0.925353	0.0893795	0.80045	0.163955	0.860765
RAD51D	0.00181488	0.0108108	0.00586265	0.101215	0.812002	0.3452	0.892383	0.181993	0.905176
MYB	0.00453721	0.0108108	0.00921273	0.26583	0.917246	0.689982	1	0.21441	0.95767
BRCA2	0.0217786	0.0108108	0.0301508	0.56868	1	0.221934	0.842451	0.23916	0.95767
IGF1R	0.0172414	0.0108108	0.0234506	0.756199	1	0.415603	0.930875	0.306117	0.980613
KDM6A	0.00544465	0.0108108	0.00921273	0.322991	0.925353	0.689982	1	0.33718	1
CRKL	0.00816697	0.0108108	0.0117253	0.664385	1	1	1	0.411282	1
SETD2	0.00362976	0.0108108	0.00167504	0.208663	0.896301	0.0893795	0.80045	0.435726	1
CDC73	0.00272232	0.0108108	0.00502513	0.153083	0.812002	0.292509	0.863815	0.51012	1
FANCA	0.00907441	0.0108108	0.0125628	0.68667	1	1	1	0.546903	1
KMT2D	0.00998185	0.0108108	0.0134003	1	1	1	1	0.562016	1
KDM5A	0.0190563	0.0108108	0.0226131	0.762022	1	0.413875	0.930875	0.563483	1
CCND3	0.0136116	0.0108108	0.0108878	1	1	1	1	0.573733	1
NBN	0.00453721	0.0108108	0.00670017	0.26583	0.917246	0.63217	0.987678	0.584004	1
NRAS	0.00453721	0.0108108	0.00670017	0.26583	0.917246	0.63217	0.987678	0.584004	1
NKX2-1	0.0172414	0.0108108	0.0201005	0.756199	1	0.56413	0.987678	0.646662	1
SOX2	0.0108893	0.0108108	0.0134003	1	1	1	1	0.70437	1
ARAF	0.00362976	0.0108108	0.00251256	0.208663	0.896301	0.136078	0.80045	0.716577	1
KDM5C	0.00725953	0.0108108	0.00837521	0.643533	1	0.669319	1	0.81649	1
ERBB4	0.0127042	0.0108108	0.0117253	1	1	1	1	0.851353	1
BRCA1	0.022686	0.0108108	0.0242881	0.411192	0.957524	0.419697	0.930875	0.890583	1
AMER1	0.00181488	0.0108108	0.00251256	0.101215	0.812002	0.136078	0.80045	1	1
PIK3CB	0.00181488	0.0108108	0.00251256	0.101215	0.812002	0.136078	0.80045	1	1
PRKAR1A	0.00362976	0.0108108	0.00335008	0.208663	0.896301	0.186676	0.842451	1	1
RNF43	0.00453721	0.0108108	0.0041876	0.26583	0.917246	0.239302	0.842451	1	1
FGF14	0.00635209	0.0108108	0.00586265	0.625221	1	0.3452	0.892383	1	1
MET	0.00725953	0.0108108	0.00753769	0.643533	1	0.649769	0.998425	1	1
SMARCA4	0.0127042	0.0108108	0.0134003	1	1	1	1	1	1
STAG2	0.00998185	0.0108108	0.0108878	1	1	1	1	1	1
ATRX	0.0181488	0.00540541	0.0041876	0.344143	0.925353	0.579364	0.987678	0.00186523	0.11751
REL	0.00998185	0.00540541	0.00167504	1	1	0.351106	0.892383	0.0100984	0.307148
JAK3	0.00544465	0.00540541	0	1	1	0.134155	0.80045	0.0121388	0.307148
EPHB1	0.00544465	0.00540541	0.000837521	1	1	0.250397	0.842451	0.0603126	0.852368
AXL	0.00635209	0.00540541	0.00167504	1	1	0.351106	0.892383	0.096934	0.852368
EPHA3	0.0172414	0.00540541	0.0108878	0.34103	0.925353	0.707684	1	0.215265	0.95767
TNFAIP3	0.000907441	0.00540541	0.0041876	0.266923	0.917246	0.579364	0.987678	0.220397	0.95767
CBL	0.00453721	0.00540541	0.00167504	1	1	0.351106	0.892383	0.27108	0.961973
MTOR	0.00272232	0.00540541	0.000837521	0.46288	0.975645	0.250397	0.842451	0.355849	1
NOTCH2	0.0208711	0.00540541	0.0159129	0.236614	0.917246	0.503479	0.981113	0.436625	1
GNA13	0.000907441	0.00540541	0	0.266923	0.917246	0.134155	0.80045	0.479965	1
ASXL1	0.00635209	0.00540541	0.00921273	1	1	1	1	0.485386	1
CDK8	0.00635209	0.00540541	0.00921273	1	1	1	1	0.485386	1
FBXW7	0.00998185	0.00540541	0.00670017	1	1	1	1	0.490726	1
KEAP1	0.00453721	0.00540541	0.00251256	1	1	0.438348	0.930875	0.492092	1
RARA	0.0117967	0.00540541	0.00837521	0.706354	1	1	1	0.530199	1
CTNNB1	0.00635209	0.00540541	0.0041876	1	1	0.579364	0.987678	0.568077	1
BCL2	0.00453721	0.00540541	0.00670017	1	1	1	1	0.584004	1
AXIN1	0.00272232	0.00540541	0.00167504	0.46288	0.975645	0.351106	0.892383	0.675718	1
BARD1	0.00272232	0.00540541	0.00167504	0.46288	0.975645	0.351106	0.892383	0.675718	1
CIC	0.00181488	0.00540541	0.00335008	0.372464	0.925353	0.513916	0.981113	0.688598	1
EPHB4	0.0108893	0.00540541	0.0134003	0.706084	1	0.716432	1	0.70437	1
SDHA	0.00362976	0.00540541	0.00251256	0.540329	1	0.438348	0.930875	0.716577	1
FAS	0.00362976	0.00540541	0.00251256	0.540329	1	0.438348	0.930875	0.716577	1
SMAD2	0.00544465	0.00540541	0.0041876	1	1	0.579364	0.987678	0.766711	1
FGFR3	0.00453721	0.00540541	0.00586265	1	1	1	1	0.776002	1
RAD51C	0.00453721	0.00540541	0.00586265	1	1	1	1	0.776002	1
BCL2L2	0.0108893	0.00540541	0.0125628	0.706084	1	0.71099	1	0.846876	1
FANCL	0	0.00540541	0	0.143745	0.812002	0.134155	0.80045	1	1
MERTK	0	0.00540541	0	0.143745	0.812002	0.134155	0.80045	1	1
SDHB	0	0.00540541	0	0.143745	0.812002	0.134155	0.80045	1	1
HNF1A	0	0.00540541	0.000837521	0.143745	0.812002	0.250397	0.842451	1	1
SMO	0	0.00540541	0.000837521	0.143745	0.812002	0.250397	0.842451	1	1
STAT3	0.000907441	0.00540541	0.000837521	0.266923	0.917246	0.250397	0.842451	1	1
BCL2L1	0.0172414	0.00540541	0.0167504	0.34103	0.925353	0.343685	0.892383	1	1
NTRK3	0.00181488	0.00540541	0.00251256	0.372464	0.925353	0.438348	0.930875	1	1
VHL	0.00181488	0.00540541	0.00251256	0.372464	0.925353	0.438348	0.930875	1	1
MLH1	0.00272232	0.00540541	0.00251256	0.46288	0.975645	0.438348	0.930875	1	1
ETV6	0.00362976	0.00540541	0.00335008	0.540329	1	0.513916	0.981113	1	1
BRAF	0.0117967	0.00540541	0.0117253	0.706354	1	0.707931	1	1	1
CD274	0.0108893	0.00540541	0.0100503	0.706084	1	1	1	1	1
PDCD1LG2	0.0108893	0.00540541	0.0100503	0.706084	1	1	1	1	1
MEN1	0.00544465	0.00540541	0.00502513	1	1	1	1	1	1
MSH6	0.00544465	0.00540541	0.00586265	1	1	1	1	1	1
AURKB	0.00544465	0	0	0.602001	1	1	1	0.0121388	0.307148
APC	0.0127042	0	0.00586265	0.241712	0.917246	0.60326	0.987678	0.122804	0.85412
SMAD4	0.0154265	0	0.0242881	0.154182	0.812002	0.0250362	0.591481	0.138419	0.855237
TSC1	0.00181488	0	0.00586265	1	1	0.60326	0.987678	0.181993	0.905176
PBRM1	0.00998185	0	0.00502513	0.381892	0.925353	1	1	0.223418	0.95767
CREBBP	0.0145191	0	0.00921273	0.148941	0.812002	0.377859	0.924505	0.251662	0.95767
CUL4A	0.00635209	0	0.0108878	0.602363	1	0.236705	0.842451	0.268813	0.961973
SF3B1	0.00816697	0	0.0041876	0.373315	0.925353	1	1	0.285921	0.961973
TSC2	0.00725953	0	0.0117253	0.610884	1	0.237915	0.842451	0.292542	0.961973
MUTYH	0.0145191	0	0.0201005	0.148941	0.812002	0.0630668	0.80045	0.340685	1
FLCN	0.00272232	0	0.00586265	1	1	0.60326	0.987678	0.346634	1
WT1	0.00453721	0	0.00670017	1	1	0.607391	0.987678	0.584004	1
MSH2	0.00544465	0	0.00753769	0.602001	1	0.617593	0.987678	0.610466	1
DNMT3A	0.0145191	0	0.0175879	0.148941	0.812002	0.0987708	0.80045	0.62063	1
BRD4	0.00907441	0	0.0108878	0.373739	0.925353	0.236705	0.842451	0.681809	1
HGF	0.0163339	0	0.0184255	0.0937531	0.812002	0.0612002	0.80045	0.751212	1
RBM10	0.00362976	0	0.00502513	1	1	1	1	0.755349	1
PAX5	0.00635209	0	0.00502513	0.602363	1	1	1	0.783624	1
ERBB3	0.0272232	0	0.0268007	0.0154836	0.418058	0.0160165	0.56427	1	1
NF2	0.00725953	0	0.00670017	0.610884	1	0.607391	0.987678	1	1
PTCH1	0.00544465	0	0.00502513	0.602001	1	1	1	1	1
ACVR1B	0.00453721	0	0.00502513	1	1	1	1	1	1

## Sheet: FDR ER+HER2-
Prevalence of ER+/HER2- >0.5%: Genes with prevalence more than 0.5% in any cohort and Benjamini-Hochberg p-value
Gene	% var local	% var brain met	% var other met	pval brain met vs BC	Benjamini-Hochberg P-value BM vs BC	pval brain met vs other met	Benjamini-Hochberg P-value BM vs Other Met	pval other met vs BC	Benjamini-Hochberg P-value Other Met vs BC
TP53	0.438378	0.438679	0.324921	1	1	0.00360982	0.137394	3.28765e-05	0.0020493
PIK3CA	0.366615	0.382075	0.425868	0.682666	1	0.295274	0.756387	0.0340817	0.412988
ZNF703	0.190328	0.254717	0.227129	0.0502125	0.426806	0.453522	0.892722	0.113045	0.739915
CCND1	0.207488	0.240566	0.294953	0.335524	0.936461	0.134362	0.62794	0.000373038	0.00996544
FGF4	0.180967	0.221698	0.271293	0.191687	0.811162	0.174299	0.62794	0.000130639	0.00488591
FGF19	0.188768	0.216981	0.27918	0.370265	0.962946	0.0869352	0.563614	0.000157181	0.00489882
FGF3	0.179407	0.216981	0.276025	0.225926	0.828395	0.103914	0.571528	4.4046e-05	0.00205915
FGFR1	0.182527	0.216981	0.195584	0.269182	0.860465	0.490212	0.918081	0.567665	0.925645
MYC	0.193448	0.20283	0.171924	0.76516	1	0.303697	0.76745	0.34626	0.910405
GATA3	0.141966	0.198113	0.171924	0.0628694	0.489857	0.407597	0.881933	0.144248	0.770697
ESR1	0.0483619	0.169811	0.324921	1.61587e-07	3.02167e-05	1.01972e-05	0.00190687	4.55276e-40	8.51367e-38
PTEN	0.109204	0.146226	0.119874	0.176744	0.811162	0.339832	0.784549	0.597879	0.937444
ZNF217	0.101404	0.136792	0.0883281	0.164414	0.811162	0.0478541	0.474018	0.445627	0.910405
GNAS	0.0889236	0.122642	0.0583596	0.180491	0.811162	0.00367364	0.137394	0.0415474	0.431631
ARFRP1	0.0624025	0.103774	0.0520505	0.0482751	0.426806	0.0146948	0.392561	0.470266	0.910405
MAP2K4	0.049922	0.0990566	0.0709779	0.0135893	0.258207	0.185896	0.62794	0.126809	0.741042
AURKA	0.0686427	0.0896226	0.0583596	0.362815	0.962946	0.113528	0.574171	0.49166	0.910405
EMSY	0.0686427	0.0896226	0.105678	0.362815	0.962946	0.599657	0.918081	0.02207	0.343925
ARID1A	0.0592824	0.0849057	0.0867508	0.201664	0.811162	1	1	0.0670036	0.626484
CDKN2A	0.0592824	0.0801887	0.0536278	0.332304	0.936461	0.181736	0.62794	0.716435	0.969373
NF1	0.0421217	0.0801887	0.0646688	0.0467476	0.426806	0.434951	0.881933	0.081243	0.690566
BRCA2	0.0577223	0.0754717	0.0583596	0.411276	0.993196	0.412751	0.881933	1	1
CDH1	0.0686427	0.0707547	0.15142	0.877102	1	0.00213018	0.137394	2.54224e-06	0.000237699
RB1	0.0468019	0.0707547	0.0567823	0.213282	0.813955	0.504765	0.918081	0.449858	0.910405
MCL1	0.0436817	0.0660377	0.044164	0.201447	0.811162	0.204584	0.659606	1	1
MDM2	0.0639626	0.0660377	0.0772871	0.873162	1	0.652725	0.95359	0.382536	0.910405
CDKN2B	0.0436817	0.0566038	0.0394322	0.454788	1	0.331206	0.784549	0.779481	0.977617
PIK3C2B	0.0452418	0.0566038	0.0425868	0.578124	1	0.448716	0.892659	0.891539	1
BRCA1	0.0374415	0.0518868	0.0236593	0.423394	0.993196	0.0621477	0.489937	0.192904	0.881579
FGFR2	0.0202808	0.0518868	0.0189274	0.0276435	0.369239	0.0245669	0.474018	1	1
MDM4	0.0358814	0.0518868	0.0425868	0.313057	0.914713	0.567977	0.918081	0.566358	0.925645
AKT1	0.0514821	0.0471698	0.0488959	1	1	1	1	0.898166	1
ERBB3	0.0171607	0.0471698	0.011041	0.0207973	0.299161	0.00286979	0.137394	0.477636	0.910405
MAP3K1	0.0624025	0.0471698	0.0488959	0.501208	1	1	1	0.329142	0.910405
SPEN	0.0296412	0.0471698	0.0283912	0.272324	0.860465	0.187858	0.62794	1	1
TBX3	0.0296412	0.0471698	0.0473186	0.272324	0.860465	1	1	0.11018	0.739915
ATM	0.0312012	0.0424528	0.0347003	0.511148	1	0.672608	0.966017	0.755752	0.977617
KRAS	0.0296412	0.0424528	0.0362776	0.375909	0.962946	0.679522	0.966017	0.533645	0.925645
PALB2	0.00780031	0.0377358	0.0141956	0.00509817	0.258207	0.0461952	0.474018	0.296642	0.894711
STK11	0.0171607	0.0377358	0.011041	0.103536	0.691475	0.0293405	0.474018	0.477636	0.910405
CCNE1	0.0202808	0.0330189	0.0157729	0.298264	0.914349	0.153931	0.62794	0.674932	0.937444
IKBKE	0.0265211	0.0330189	0.0347003	0.633513	1	1	1	0.420188	0.910405
LYN	0.0421217	0.0330189	0.0536278	0.687034	1	0.270497	0.712437	0.360259	0.910405
SMAD4	0.00780031	0.0330189	0.0173502	0.0131917	0.258207	0.175495	0.62794	0.138992	0.770697
CDK4	0.0218409	0.0283019	0.0157729	0.602722	1	0.250365	0.701163	0.537509	0.925645
CREBBP	0.0109204	0.0283019	0.011041	0.100323	0.691475	0.1022	0.571528	1	1
ERBB2	0.0187207	0.0283019	0.0315457	0.411528	0.993196	1	1	0.155474	0.8076
ERBB4	0.00468019	0.0283019	0.00788644	0.00933766	0.258207	0.0337534	0.474018	0.504235	0.910405
FAS	0.00624025	0.0283019	0.0126183	0.0185475	0.289032	0.127865	0.62794	0.262161	0.881579
HGF	0.0140406	0.0283019	0.00473186	0.223373	0.828395	0.00974867	0.303834	0.14417	0.770697
IGF1R	0.0358814	0.0283019	0.0457413	0.826881	1	0.323512	0.784549	0.398153	0.910405
KDM5A	0.0280811	0.0283019	0.0157729	1	1	0.250365	0.701163	0.180258	0.881579
RICTOR	0.00780031	0.0283019	0.011041	0.0324662	0.399231	0.1022	0.571528	0.577294	0.925645
AKT3	0.0187207	0.0235849	0.0394322	0.776601	1	0.390732	0.85961	0.0302592	0.404177
ASXL1	0.0109204	0.0235849	0.0126183	0.1847	0.811162	0.329815	0.784549	0.801479	0.98603
EP300	0.0109204	0.0235849	0.00788644	0.1847	0.811162	0.13248	0.62794	0.773387	0.977617
NTRK1	0.00624025	0.0235849	0.0157729	0.0468891	0.426806	0.546567	0.918081	0.114654	0.739915
PARP1	0.0265211	0.0235849	0.055205	1	1	0.0628797	0.489937	0.0105758	0.197767
PIK3CB	0.00156006	0.0235849	0.011041	0.00437304	0.258207	0.18789	0.62794	0.0375443	0.412988
PIK3R1	0.0187207	0.0235849	0.0236593	0.776601	1	1	1	0.565536	0.925645
SOX2	0.0124805	0.0235849	0.00473186	0.328045	0.936461	0.0269548	0.474018	0.224612	0.881579
SOX9	0.00780031	0.0235849	0.00630915	0.131652	0.811162	0.0484626	0.474018	1	1
TERC	0.0156006	0.0235849	0.00630915	0.545344	1	0.0484626	0.474018	0.177255	0.881579
ACVR1B	0.00780031	0.0188679	0.00315457	0.237238	0.837048	0.037362	0.474018	0.451884	0.910405
BARD1	0.00312012	0.0188679	0.00315457	0.0362937	0.399231	0.037362	0.474018	1	1
BRD4	0.0109204	0.0188679	0.00788644	0.480145	1	0.239213	0.701163	0.773387	0.977617
CHEK2	0.0280811	0.0188679	0.0473186	0.619476	1	0.0711666	0.492895	0.0782015	0.690566
FGF10	0.00156006	0.0188679	0.00473186	0.0150133	0.258207	0.0702805	0.492895	0.371682	0.910405
FGF12	0.00936037	0.0188679	0.00315457	0.276085	0.860465	0.037362	0.474018	0.287574	0.881579
KEL	0.00780031	0.0188679	0.00788644	0.237238	0.837048	0.239213	0.701163	1	1
MAP2K1	0.00468019	0.0188679	0.00473186	0.0684029	0.511654	0.0702805	0.492895	1	1
MSH6	0.00312012	0.0188679	0.00630915	0.0362937	0.399231	0.113606	0.574171	0.449654	0.910405
MUTYH	0.0124805	0.0188679	0.0141956	0.505398	1	0.746755	1	0.812363	0.992888
NOTCH1	0.024961	0.0188679	0.00946372	0.795271	1	0.279345	0.72552	0.0505528	0.497546
PRKCI	0.0140406	0.0188679	0.00630915	0.74607	1	0.113606	0.574171	0.264466	0.881579
RPTOR	0.0156006	0.0188679	0.011041	0.757227	1	0.481551	0.918081	0.626801	0.937444
SF3B1	0.0218409	0.0188679	0.0126183	1	1	0.507959	0.918081	0.282223	0.881579
SRC	0.0156006	0.0188679	0.011041	0.757227	1	0.481551	0.918081	0.626801	0.937444
ABL1	0.00156006	0.0141509	0.00473186	0.0495508	0.426806	0.169666	0.62794	0.371682	0.910405
ATRX	0.0124805	0.0141509	0.00315457	0.739455	1	0.103514	0.571528	0.108048	0.739915
BCL2L2	0.0109204	0.0141509	0.00788644	0.716106	1	0.420945	0.881933	0.773387	0.977617
CDKN1B	0.0156006	0.0141509	0.0205047	1	1	0.772649	1	0.535527	0.925645
EGFR	0.0171607	0.0141509	0.0141956	1	1	1	1	0.822459	0.998701
EPHB4	0.00624025	0.0141509	0.00630915	0.37415	0.962946	0.37585	0.836714	1	1
FANCG	0	0.0141509	0.00157729	0.0151887	0.258207	0.0506971	0.474018	0.497255	0.910405
FLT3	0.00936037	0.0141509	0.011041	0.697657	1	0.71766	0.979579	0.788407	0.977617
JUN	0	0.0141509	0.00157729	0.0151887	0.258207	0.0506971	0.474018	0.497255	0.910405
KDM5C	0.00468019	0.0141509	0.00473186	0.16642	0.811162	0.169666	0.62794	1	1
KDM6A	0.0124805	0.0141509	0.00946372	0.739455	1	0.698477	0.96752	0.789413	0.977617
KMT2D	0.0171607	0.0141509	0.00630915	1	1	0.37585	0.836714	0.116393	0.739915
NF2	0	0.0141509	0.00473186	0.0151887	0.258207	0.169666	0.62794	0.12266	0.739915
NFKBIA	0.0171607	0.0141509	0.0315457	1	1	0.226611	0.701163	0.104205	0.739915
NOTCH2	0.024961	0.0141509	0.0189274	0.433457	0.993196	0.772558	1	0.567427	0.925645
NOTCH3	0.00936037	0.0141509	0.0141956	0.697657	1	1	1	0.449515	0.910405
PBRM1	0.00468019	0.0141509	0.00946372	0.16642	0.811162	0.698477	0.96752	0.339542	0.910405
RBM10	0	0.0141509	0.00315457	0.0151887	0.258207	0.103514	0.571528	0.247066	0.881579
ROS1	0.00780031	0.0141509	0.00630915	0.418009	0.993196	0.37585	0.836714	1	1
TSC1	0.00468019	0.0141509	0.011041	0.16642	0.811162	0.71766	0.979579	0.222382	0.881579
TSC2	0.00780031	0.0141509	0.00788644	0.418009	0.993196	0.420945	0.881933	1	1
APC	0.0187207	0.00943396	0.00946372	0.536097	1	1	1	0.234663	0.881579
ATR	0.00624025	0.00943396	0.00473186	0.641949	1	0.603872	0.918081	1	1
BCL2L1	0.0124805	0.00943396	0.00473186	1	1	0.603872	0.918081	0.224612	0.881579
BCORL1	0.00780031	0.00943396	0.00473186	0.686335	1	0.603872	0.918081	0.725734	0.969373
BRAF	0.0109204	0.00943396	0.0283912	1	1	0.188046	0.62794	0.0266953	0.384001
CBFB	0.0124805	0.00943396	0.0157729	1	1	0.740054	1	0.643579	0.937444
CCND3	0.0156006	0.00943396	0.00946372	0.740074	1	1	1	0.451714	0.910405
CD274	0.00936037	0.00943396	0.00315457	1	1	0.262468	0.701163	0.287574	0.881579
CDK6	0.00468019	0.00943396	0.00630915	0.60279	1	0.643908	0.948117	0.72443	0.969373
CDK8	0.00624025	0.00943396	0.00473186	0.641949	1	0.603872	0.918081	1	1
CIC	0.00468019	0.00943396	0.00473186	0.60279	1	0.603872	0.918081	1	1
CSF1R	0	0.00943396	0.00315457	0.0615502	0.489857	0.262468	0.701163	0.247066	0.881579
CUL4A	0.0124805	0.00943396	0.00946372	1	1	1	1	0.789413	0.977617
EPHA3	0.00156006	0.00943396	0.00473186	0.154273	0.811162	0.603872	0.918081	0.371682	0.910405
EPHB1	0.00468019	0.00943396	0.00157729	0.60279	1	0.156582	0.62794	0.624433	0.937444
ETV6	0.00468019	0.00943396	0.00157729	0.60279	1	0.156582	0.62794	0.624433	0.937444
FANCA	0.0109204	0.00943396	0.00788644	1	1	1	1	0.773387	0.977617
FANCC	0.00468019	0.00943396	0.00473186	0.60279	1	0.603872	0.918081	1	1
FGFR4	0.00624025	0.00943396	0.0126183	0.641949	1	1	1	0.262161	0.881579
FH	0.00156006	0.00943396	0.00157729	0.154273	0.811162	0.156582	0.62794	1	1
IRS2	0.0109204	0.00943396	0.00630915	1	1	0.643908	0.948117	0.547118	0.925645
JAK1	0.00312012	0.00943396	0.00157729	0.258996	0.860465	0.156582	0.62794	1	1
KDR	0.00624025	0.00943396	0.00473186	0.641949	1	0.603872	0.918081	1	1
KIT	0.00936037	0.00943396	0.00315457	1	1	0.262468	0.701163	0.287574	0.881579
MSH2	0.00624025	0.00943396	0.00157729	0.641949	1	0.156582	0.62794	0.374055	0.910405
MYCN	0.00156006	0.00943396	0.00630915	0.154273	0.811162	0.643908	0.948117	0.215465	0.881579
NKX2-1	0.0156006	0.00943396	0.0189274	0.740074	1	0.536169	0.918081	0.673438	0.937444
PMS2	0.00624025	0.00943396	0.00315457	0.641949	1	0.262468	0.701163	0.686791	0.937444
PRDM1	0.0124805	0.00943396	0	1	1	0.0625736	0.489937	0.00764833	0.158915
PRKAR1A	0.00156006	0.00943396	0	0.154273	0.811162	0.0625736	0.489937	1	1
PTPN11	0.00156006	0.00943396	0.00788644	0.154273	0.811162	1	1	0.122234	0.739915
QKI	0.00312012	0.00943396	0.00315457	0.258996	0.860465	0.262468	0.701163	1	1
RET	0.00780031	0.00943396	0.00630915	0.686335	1	0.643908	0.948117	1	1
SETD2	0.00936037	0.00943396	0.00315457	1	1	0.262468	0.701163	0.287574	0.881579
SMARCA4	0.00936037	0.00943396	0.00473186	1	1	0.603872	0.918081	0.506321	0.910405
VEGFA	0.0171607	0.00943396	0.00788644	0.536136	1	1	1	0.207337	0.881579
AKT2	0.00624025	0.00471698	0.0126183	1	1	0.463212	0.902298	0.262161	0.881579
AMER1	0.00312012	0.00471698	0.00788644	0.576142	1	1	1	0.285234	0.881579
AXL	0.00312012	0.00471698	0.00315457	0.576142	1	1	1	1	1
BAP1	0.0109204	0.00471698	0.00788644	0.687077	1	1	1	0.773387	0.977617
BCL2	0.00156006	0.00471698	0.011041	0.435519	0.993196	0.68706	0.966017	0.0375443	0.412988
BRIP1	0.0187207	0.00471698	0.00315457	0.203875	0.811162	1	1	0.0124905	0.212338
CASP8	0.00780031	0.00471698	0.00946372	1	1	0.686936	0.966017	0.772306	0.977617
CCND2	0.0156006	0.00471698	0.00473186	0.30918	0.914713	1	1	0.0907048	0.737469
CRKL	0.00312012	0.00471698	0.00630915	0.576142	1	1	1	0.449654	0.910405
CTCF	0.00624025	0.00471698	0.00473186	1	1	1	1	1	1
CTNNA1	0.00936037	0.00471698	0.00473186	1	1	1	1	0.506321	0.910405
CUL3	0.00156006	0.00471698	0.00157729	0.435519	0.993196	0.438608	0.881933	1	1
DDR2	0.00156006	0.00471698	0.00157729	0.435519	0.993196	0.438608	0.881933	1	1
DNMT3A	0.0156006	0.00471698	0.0173502	0.30918	0.914713	0.312687	0.779634	0.829584	1
FGF23	0.0109204	0.00471698	0.00473186	0.687077	1	1	1	0.341887	0.910405
FGF6	0.0109204	0.00471698	0.00473186	0.687077	1	1	1	0.341887	0.910405
JAK2	0.0124805	0.00471698	0.00788644	0.464353	1	1	1	0.579147	0.925645
MEN1	0.00312012	0.00471698	0.0236593	0.576142	1	0.0874054	0.563614	0.00116177	0.0271563
MLH1	0.00312012	0.00471698	0.00788644	0.576142	1	1	1	0.285234	0.881579
MYCL	0.0109204	0.00471698	0.00473186	0.687077	1	1	1	0.341887	0.910405
NRAS	0.00780031	0.00471698	0.00788644	1	1	1	1	1	1
PDCD1LG2	0.00780031	0.00471698	0.00315457	1	1	1	1	0.451884	0.910405
PDGFRA	0.00624025	0.00471698	0.00315457	1	1	1	1	0.686791	0.937444
PRKN	0.00624025	0.00471698	0.00315457	1	1	1	1	0.686791	0.937444
RAD51B	0.00312012	0.00471698	0.00473186	0.576142	1	1	1	0.685304	0.937444
RAF1	0.00780031	0.00471698	0.011041	1	1	0.68706	0.966017	0.577294	0.925645
REL	0.00468019	0.00471698	0	1	1	0.250591	0.701163	0.249434	0.881579
RNF43	0.00312012	0.00471698	0.00473186	0.576142	1	1	1	0.685304	0.937444
TNFAIP3	0	0.00471698	0.00157729	0.248535	0.860465	0.438608	0.881933	0.497255	0.910405
VHL	0.00312012	0.00471698	0.00630915	0.576142	1	1	1	0.449654	0.910405
BCOR	0.00468019	0	0.00788644	1	1	0.338949	0.784549	0.504235	0.910405
CDK12	0.0109204	0	0.00630915	0.202619	0.811162	0.577128	0.918081	0.547118	0.925645
EZH2	0.00312012	0	0.00630915	1	1	0.577128	0.918081	0.449654	0.910405
FANCL	0.00624025	0	0.00157729	0.577139	1	1	1	0.374055	0.910405
FBXW7	0.00936037	0	0.00315457	0.345446	0.949976	1	1	0.287574	0.881579
FLCN	0.00312012	0	0.00473186	1	1	0.576961	0.918081	0.685304	0.937444
GATA6	0.00312012	0	0.00473186	1	1	0.576961	0.918081	0.685304	0.937444
GRM3	0.00624025	0	0.00157729	0.577139	1	1	1	0.374055	0.910405
MAP2K2	0.00312012	0	0.00630915	1	1	0.577128	0.918081	0.449654	0.910405
MET	0.00312012	0	0.00473186	1	1	0.576961	0.918081	0.685304	0.937444
PAX5	0.00156006	0	0.00473186	1	1	0.576961	0.918081	0.371682	0.910405
PTCH1	0.00624025	0	0.00473186	0.577139	1	0.576961	0.918081	1	1
RAD51C	0.00312012	0	0.00473186	1	1	0.576961	0.918081	0.685304	0.937444
STAG2	0.0124805	0	0.00788644	0.211362	0.813955	0.338949	0.784549	0.579147	0.925645
TET2	0.0156006	0	0.011041	0.0749693	0.539202	0.201926	0.659606	0.626801	0.937444

## Sheet: FDR ER+HER2+
Prevalence of ER+/HER2+ >0.5%: Genes with prevalence more than 0.5% in any cohort and Benjamini-Hochberg p-value
Gene	% var local	% var brain met	% var other met	pval brain met vs BC	Benjamini-Hochberg P-value BM vs BC	pval brain met vs other met	Benjamini-Hochberg P-value BM vs Other Met	pval other met vs BC	Benjamini-Hochberg P-value Other Met vs BC
ERBB2	1	1	1	1	1	1	1	1	1
TP53	0.642857	0.545455	0.612245	0.243912	1	0.568047	1	0.852335	1
MYC	0.285714	0.30303	0.265306	0.857825	1	0.682849	1	0.843481	1
PIK3CA	0.392857	0.242424	0.408163	0.0559599	1	0.0691129	0.947097	1	1
CCND1	0.166667	0.227273	0.346939	0.407278	1	0.206988	1	0.0208476	0.429981
FGF19	0.130952	0.19697	0.346939	0.369835	1	0.0871148	1	0.00429786	0.236382
FGF3	0.142857	0.181818	0.346939	0.654351	1	0.052484	0.947097	0.00865664	0.285669
FGF4	0.130952	0.181818	0.346939	0.49444	1	0.052484	0.947097	0.00429786	0.236382
ZNF703	0.119048	0.151515	0.285714	0.631964	1	0.104837	1	0.0201854	0.429981
CDK12	0.0833333	0.136364	0.102041	0.424927	1	0.774368	1	0.759206	1
ZNF217	0.107143	0.121212	0.22449	0.800907	1	0.203707	1	0.0812666	0.744944
GNAS	0.0595238	0.121212	0.183673	0.244377	1	0.428735	1	0.0379829	0.626717
MDM4	0.0833333	0.106061	0.102041	0.77885	1	1	1	0.759206	1
PIK3C2B	0.107143	0.106061	0.0816327	1	1	0.756498	1	0.767166	1
GATA3	0.0952381	0.0909091	0.0408163	1	1	0.463458	1	0.322993	1
MAP2K4	0.0595238	0.0909091	0.0204082	0.536648	1	0.23577	1	0.41303	1
TBX3	0.0357143	0.0909091	0.0204082	0.182491	1	0.23577	1	1	1
FGFR1	0.0714286	0.0757576	0.244898	1	1	0.0161439	0.887914	0.00762381	0.285669
ESR1	0.0595238	0.0757576	0.22449	0.749512	1	0.0297392	0.947097	0.0105812	0.290983
AKT2	0.0119048	0.0757576	0	0.087294	1	0.0706547	0.947097	1	1
AURKA	0.047619	0.0606061	0.142857	0.731283	1	0.200227	1	0.0981857	0.789474
EMSY	0.0357143	0.0606061	0.122449	0.699792	1	0.320625	1	0.0749652	0.727604
SRC	0.0238095	0.0606061	0.0612245	0.405541	1	1	1	0.357193	1
IKBKE	0.047619	0.0606061	0.0612245	0.731283	1	1	1	0.70815	1
ARID1A	0.0357143	0.0454545	0.0816327	1	1	0.457057	1	0.422381	1
MDM2	0.0357143	0.0454545	0.0816327	1	1	0.457057	1	0.422381	1
LYN	0.0357143	0.0454545	0.0408163	1	1	1	1	1	1
CDH1	0.0119048	0.0454545	0.0408163	0.320532	1	1	1	0.554366	1
PIK3R1	0.0119048	0.0454545	0.0408163	0.320532	1	1	1	0.554366	1
JAK2	0.0119048	0.0454545	0.0204082	0.320532	1	0.635123	1	1	1
ROS1	0.0119048	0.0454545	0.0204082	0.320532	1	0.635123	1	1	1
FGFR2	0	0.0454545	0.0204082	0.0830038	1	0.635123	1	0.368421	1
IRS2	0	0.0454545	0	0.0830038	1	0.259954	1	1	1
NOTCH1	0	0.0454545	0	0.0830038	1	0.259954	1	1	1
ARFRP1	0.0238095	0.030303	0.204082	1	1	0.00398366	0.410013	0.000813018	0.134148
NF1	0.0595238	0.030303	0.142857	0.466298	1	0.0359906	0.947097	0.124406	0.789474
PTEN	0.0119048	0.030303	0.102041	0.582666	1	0.134156	1	0.0254007	0.46568
MAP3K1	0.0357143	0.030303	0.0408163	1	1	1	1	1	1
NFKBIA	0.0357143	0.030303	0.0408163	1	1	1	1	1	1
CDK4	0.0238095	0.030303	0.0408163	1	1	1	1	0.625211	1
FGF6	0	0.030303	0.0408163	0.191946	1	1	1	0.133971	0.789474
MCL1	0.119048	0.030303	0.0204082	0.0673862	1	1	1	0.0542573	0.639461
IGF1R	0.047619	0.030303	0.0204082	0.695027	1	1	1	0.651359	1
NKX2-1	0.0357143	0.030303	0.0204082	1	1	1	1	1	1
ATM	0.0119048	0.030303	0.0204082	0.582666	1	1	1	1	1
PARP1	0.0119048	0.030303	0.0204082	0.582666	1	1	1	1	1
RPTOR	0	0.030303	0.0204082	0.191946	1	1	1	0.368421	1
ATR	0.0357143	0.030303	0	1	1	0.506636	1	0.296651	1
EGFR	0.0357143	0.030303	0	1	1	0.506636	1	0.296651	1
BRIP1	0.0119048	0.030303	0	0.582666	1	0.506636	1	1	1
KDM5C	0.0119048	0.030303	0	0.582666	1	0.506636	1	1	1
KDR	0	0.030303	0	0.191946	1	0.506636	1	1	1
KIT	0	0.030303	0	0.191946	1	0.506636	1	1	1
MET	0	0.030303	0	0.191946	1	0.506636	1	1	1
MRE11	0	0.030303	0	0.191946	1	0.506636	1	1	1
MYB	0	0.030303	0	0.191946	1	0.506636	1	1	1
SETD2	0	0.030303	0	0.191946	1	0.506636	1	1	1
CDKN2A	0.0357143	0.0151515	0.122449	0.630929	1	0.0408004	0.947097	0.0749652	0.727604
CCNE1	0.0238095	0.0151515	0.0816327	1	1	0.161769	1	0.192406	1
KRAS	0.0119048	0.0151515	0.0816327	1	1	0.161769	1	0.0613078	0.674386
CHEK2	0.0357143	0.0151515	0.0408163	0.630929	1	0.57431	1	1	1
FGFR4	0.0238095	0.0151515	0.0408163	1	1	0.57431	1	0.625211	1
MYCN	0.0119048	0.0151515	0.0408163	1	1	0.57431	1	0.554366	1
CCND2	0	0.0151515	0.0408163	0.44	1	0.57431	1	0.133971	0.789474
FGF23	0	0.0151515	0.0408163	0.44	1	0.57431	1	0.133971	0.789474
JUN	0	0.0151515	0.0408163	0.44	1	0.57431	1	0.133971	0.789474
FGF12	0	0.0151515	0.0408163	0.44	1	0.57431	1	0.133971	0.789474
MYCL	0.047619	0.0151515	0.0204082	0.384882	1	1	1	0.651359	1
SOX9	0.0119048	0.0151515	0.0204082	1	1	1	1	1	1
VEGFA	0.0119048	0.0151515	0.0204082	1	1	1	1	1	1
BCL2	0	0.0151515	0.0204082	0.44	1	1	1	0.368421	1
EP300	0	0.0151515	0.0204082	0.44	1	1	1	0.368421	1
NOTCH2	0	0.0151515	0.0204082	0.44	1	1	1	0.368421	1
NTRK3	0	0.0151515	0.0204082	0.44	1	1	1	0.368421	1
TERC	0.0357143	0.0151515	0.0204082	0.630929	1	1	1	1	1
GID4	0.0238095	0.0151515	0.0204082	1	1	1	1	1	1
PRKCI	0.0357143	0.0151515	0	0.630929	1	1	1	0.296651	1
CDK6	0.0238095	0.0151515	0	1	1	1	1	0.5311	1
KEL	0.0238095	0.0151515	0	1	1	1	1	0.5311	1
RARA	0.0238095	0.0151515	0	1	1	1	1	0.5311	1
RB1	0.0238095	0.0151515	0	1	1	1	1	0.5311	1
ATRX	0.0119048	0.0151515	0	1	1	1	1	1	1
CDC73	0.0119048	0.0151515	0	1	1	1	1	1	1
FBXW7	0.0119048	0.0151515	0	1	1	1	1	1	1
KMT2D	0.0119048	0.0151515	0	1	1	1	1	1	1
NTRK1	0.0119048	0.0151515	0	1	1	1	1	1	1
CD274	0.0119048	0.0151515	0	1	1	1	1	1	1
PDCD1LG2	0.0119048	0.0151515	0	1	1	1	1	1	1
PIK3CB	0.0119048	0.0151515	0	1	1	1	1	1	1
RAD51C	0.0119048	0.0151515	0	1	1	1	1	1	1
RAF1	0.0119048	0.0151515	0	1	1	1	1	1	1
RNF43	0.0119048	0.0151515	0	1	1	1	1	1	1
TNFAIP3	0.0119048	0.0151515	0	1	1	1	1	1	1
BCORL1	0	0.0151515	0	0.44	1	1	1	1	1
BRAF	0	0.0151515	0	0.44	1	1	1	1	1
CDK8	0	0.0151515	0	0.44	1	1	1	1	1
CRKL	0	0.0151515	0	0.44	1	1	1	1	1
EPHA3	0	0.0151515	0	0.44	1	1	1	1	1
FANCC	0	0.0151515	0	0.44	1	1	1	1	1
FANCL	0	0.0151515	0	0.44	1	1	1	1	1
FGF14	0	0.0151515	0	0.44	1	1	1	1	1
FLT3	0	0.0151515	0	0.44	1	1	1	1	1
KEAP1	0	0.0151515	0	0.44	1	1	1	1	1
MERTK	0	0.0151515	0	0.44	1	1	1	1	1
NBN	0	0.0151515	0	0.44	1	1	1	1	1
PALB2	0	0.0151515	0	0.44	1	1	1	1	1
PRKN	0	0.0151515	0	0.44	1	1	1	1	1
PDGFRA	0	0.0151515	0	0.44	1	1	1	1	1
PRKAR1A	0	0.0151515	0	0.44	1	1	1	1	1
SDHB	0	0.0151515	0	0.44	1	1	1	1	1
SMARCA4	0	0.0151515	0	0.44	1	1	1	1	1
SPEN	0	0.0151515	0	0.44	1	1	1	1	1
CDKN2B	0.0238095	0	0.122449	0.503893	1	0.00496985	0.410013	0.0510443	0.639461
AKT3	0.0238095	0	0.0612245	0.503893	1	0.0746198	0.947097	0.357193	1
KDM5A	0	0	0.0612245	1	1	0.0746198	0.947097	0.048066	0.639461
STK11	0	0	0.0612245	1	1	0.0746198	0.947097	0.048066	0.639461
ERBB3	0.0238095	0	0.0408163	0.503893	1	0.179405	1	0.625211	1
AR	0.0119048	0	0.0408163	1	1	0.179405	1	0.554366	1
FANCA	0.0119048	0	0.0408163	1	1	0.179405	1	0.554366	1
ASXL1	0	0	0.0408163	1	1	0.179405	1	0.133971	0.789474
CSF1R	0	0	0.0408163	1	1	0.179405	1	0.133971	0.789474
SOX2	0	0	0.0408163	1	1	0.179405	1	0.133971	0.789474
MUTYH	0.0357143	0	0.0408163	0.255839	1	0.179405	1	1	1
STAG2	0.0238095	0	0.0204082	0.503893	1	0.426087	1	1	1
HRAS	0.0119048	0	0.0204082	1	1	0.426087	1	1	1
REL	0.0119048	0	0.0204082	1	1	0.426087	1	1	1
RET	0.0119048	0	0.0204082	1	1	0.426087	1	1	1
RICTOR	0.0119048	0	0.0204082	1	1	0.426087	1	1	1
BAP1	0	0	0.0204082	1	1	0.426087	1	0.368421	1
BCL2L2	0	0	0.0204082	1	1	0.426087	1	0.368421	1
BRD4	0	0	0.0204082	1	1	0.426087	1	0.368421	1
CARD11	0	0	0.0204082	1	1	0.426087	1	0.368421	1
DAXX	0	0	0.0204082	1	1	0.426087	1	0.368421	1
DNMT3A	0	0	0.0204082	1	1	0.426087	1	0.368421	1
FGF10	0	0	0.0204082	1	1	0.426087	1	0.368421	1
FLT1	0	0	0.0204082	1	1	0.426087	1	0.368421	1
GATA4	0	0	0.0204082	1	1	0.426087	1	0.368421	1
GRM3	0	0	0.0204082	1	1	0.426087	1	0.368421	1
HGF	0	0	0.0204082	1	1	0.426087	1	0.368421	1
MLH1	0	0	0.0204082	1	1	0.426087	1	0.368421	1
NF2	0	0	0.0204082	1	1	0.426087	1	0.368421	1
RAD51B	0	0	0.0204082	1	1	0.426087	1	0.368421	1
RBM10	0	0	0.0204082	1	1	0.426087	1	0.368421	1
ERBB4	0.0119048	0	0.0204082	1	1	0.426087	1	1	1
NRAS	0.0119048	0	0.0204082	1	1	0.426087	1	1	1
NOTCH3	0.047619	0	0	0.130809	1	1	1	0.296128	1
BRCA1	0.0357143	0	0	0.255839	1	1	1	0.296651	1
BRCA2	0.0357143	0	0	0.255839	1	1	1	0.296651	1
BCL2L1	0.0238095	0	0	0.503893	1	1	1	0.5311	1
CREBBP	0.0238095	0	0	0.503893	1	1	1	0.5311	1
EPHB4	0.0238095	0	0	0.503893	1	1	1	0.5311	1
PAX5	0.0238095	0	0	0.503893	1	1	1	0.5311	1
APC	0.0119048	0	0	1	1	1	1	1	1
BCL6	0.0119048	0	0	1	1	1	1	1	1
EPHB1	0.0119048	0	0	1	1	1	1	1	1
EZH2	0.0119048	0	0	1	1	1	1	1	1
FANCG	0.0119048	0	0	1	1	1	1	1	1
IRF2	0.0119048	0	0	1	1	1	1	1	1
MSH2	0.0119048	0	0	1	1	1	1	1	1
MYD88	0.0119048	0	0	1	1	1	1	1	1
PBRM1	0.0119048	0	0	1	1	1	1	1	1
RAD54L	0.0119048	0	0	1	1	1	1	1	1
SF3B1	0.0119048	0	0	1	1	1	1	1	1
TSC1	0.0119048	0	0	1	1	1	1	1	1
TSC2	0.0119048	0	0	1	1	1	1	1	1

## Sheet: FDR ER-HER2+
Prevalence of ER-/HER2+ >0.5%: Genes with prevalence more than 0.5% in any cohort and Benjamini-Hochberg p-value
Gene	% var local	% var brain met	% var other met	pval brain met vs BC	Benjamini-Hochberg P-value BM vs BC	pval brain met vs other met	Benjamini-Hochberg P-value BM vs Other Met	pval other met vs BC	Benjamini-Hochberg P-value Other Met vs BC
ERBB2	1	1	1	1	1	1	1	1	1
TP53	0.824561	0.788235	0.843137	0.670348	1	0.503989	1	1	1
PIK3CA	0.245614	0.364706	0.431373	0.145967	1	0.47141	1	0.0650289	1
MYC	0.298246	0.223529	0.313725	0.331662	1	0.31131	1	1	1
CDK12	0.122807	0.152941	0.0392157	0.806219	1	0.0487945	1	0.167325	1
CDKN2B	0.0877193	0.117647	0.0392157	0.78162	1	0.209916	1	0.442742	1
CDKN2A	0.105263	0.105882	0.0588235	1	1	0.534272	1	0.495254	1
FGFR1	0.122807	0.105882	0.0588235	0.790905	1	0.534272	1	0.328093	1
CCND1	0.0701754	0.0941176	0.156863	0.762486	1	0.284628	1	0.221019	1
GNAS	0.0526316	0.0941176	0.0980392	0.525644	1	1	1	0.471887	1
FGF19	0.0877193	0.0941176	0.137255	1	1	0.572866	1	0.542933	1
FGF4	0.0877193	0.0941176	0.137255	1	1	0.572866	1	0.542933	1
MCL1	0.0877193	0.0941176	0.0980392	1	1	1	1	1	1
LYN	0.105263	0.0941176	0.0588235	1	1	0.535663	1	0.495254	1
FGF3	0.0877193	0.0823529	0.137255	1	1	0.384548	1	0.542933	1
ARFRP1	0.0877193	0.0823529	0.0588235	1	1	0.742877	1	0.719586	1
ARID1A	0.0175439	0.0823529	0.0196078	0.144037	1	0.257777	1	1	1
CCNE1	0.157895	0.0705882	0.156863	0.161761	1	0.145565	1	1	1
NF1	0.0526316	0.0705882	0.0784314	0.74056	1	1	1	0.704981	1
EMSY	0.0526316	0.0705882	0.0980392	0.74056	1	0.746667	1	0.471887	1
MAP2K4	0.0175439	0.0705882	0.0392157	0.242295	1	0.709737	1	0.601305	1
GATA3	0	0.0705882	0.0196078	0.0810817	1	0.255396	1	0.472222	1
ZNF217	0.0701754	0.0588235	0.0980392	1	1	0.501059	1	0.732485	1
AURKA	0.0877193	0.0588235	0.0588235	0.522479	1	1	1	0.719586	1
KRAS	0.0175439	0.0588235	0.0588235	0.401664	1	1	1	0.341837	1
FGFR4	0.0175439	0.0588235	0.0392157	0.401664	1	0.711081	1	0.601305	1
ATM	0	0.0588235	0.0196078	0.0825506	1	0.409752	1	0.472222	1
CDK4	0.105263	0.0470588	0.0784314	0.200074	1	0.472787	1	0.745996	1
ZNF703	0.105263	0.0470588	0.0196078	0.200074	1	0.650125	1	0.116823	1
AKT2	0.0526316	0.0470588	0.0196078	1	1	0.650125	1	0.62029	1
FGF10	0.0175439	0.0470588	0.0196078	0.648189	1	0.650125	1	1	1
NOTCH3	0	0.0470588	0.0196078	0.149053	1	0.650125	1	0.472222	1
CDH1	0	0.0470588	0	0.149053	1	0.296675	1	1	1
ROS1	0	0.0470588	0	0.149053	1	0.296675	1	1	1
PARP1	0.0175439	0.0352941	0.137255	0.649036	1	0.0402498	1	0.0252492	1
RB1	0.0701754	0.0352941	0.0980392	0.438575	1	0.150812	1	0.732485	1
RPTOR	0.0526316	0.0352941	0.0784314	0.68414	1	0.42452	1	0.704981	1
KDR	0.0175439	0.0352941	0.0784314	0.649036	1	0.42452	1	0.186423	1
GID4	0	0.0352941	0.0588235	0.274049	1	0.671491	1	0.102005	1
KIT	0.0175439	0.0352941	0.0588235	0.649036	1	0.671491	1	0.341837	1
JUN	0.0175439	0.0352941	0.0392157	0.649036	1	1	1	0.601305	1
MDM2	0.0526316	0.0352941	0.0196078	0.68414	1	1	1	0.62029	1
AKT3	0.0175439	0.0352941	0.0196078	0.649036	1	1	1	1	1
BCORL1	0.0175439	0.0352941	0.0196078	0.649036	1	1	1	1	1
IKBKE	0.0175439	0.0352941	0.0196078	0.649036	1	1	1	1	1
AR	0	0.0352941	0.0196078	0.274049	1	1	1	0.472222	1
MYCN	0.0526316	0.0352941	0	0.68414	1	0.291667	1	0.245327	1
RICTOR	0.0526316	0.0352941	0	0.68414	1	0.291667	1	0.245327	1
TERC	0.0526316	0.0352941	0	0.68414	1	0.291667	1	0.245327	1
TET2	0.0175439	0.0352941	0	0.649036	1	0.291667	1	1	1
CTNNA1	0	0.0352941	0	0.274049	1	0.291667	1	1	1
PALB2	0	0.0352941	0	0.274049	1	0.291667	1	1	1
PRKN	0	0.0352941	0	0.274049	1	0.291667	1	1	1
VEGFA	0	0.0352941	0	0.274049	1	0.291667	1	1	1
RET	0.0350877	0.0235294	0.0588235	1	1	0.363227	1	0.66532	1
PDGFRA	0.0175439	0.0235294	0.0392157	1	1	0.630532	1	0.601305	1
FGF12	0	0.0235294	0.0392157	0.516032	1	0.630532	1	0.220665	1
ERBB4	0	0.0235294	0.0392157	0.516032	1	0.630532	1	0.220665	1
KEL	0.0175439	0.0235294	0.0392157	1	1	0.630532	1	0.601305	1
BRCA2	0.0877193	0.0235294	0.0196078	0.11688	1	1	1	0.209943	1
FGF6	0.0350877	0.0235294	0.0196078	1	1	1	1	1	1
PIK3C2B	0.0350877	0.0235294	0.0196078	1	1	1	1	1	1
RAF1	0.0350877	0.0235294	0.0196078	1	1	1	1	1	1
SOX2	0.0350877	0.0235294	0.0196078	1	1	1	1	1	1
STK11	0.0350877	0.0235294	0.0196078	1	1	1	1	1	1
CCND2	0.0175439	0.0235294	0.0196078	1	1	1	1	1	1
FGF23	0.0175439	0.0235294	0.0196078	1	1	1	1	1	1
SOX9	0.0175439	0.0235294	0.0196078	1	1	1	1	1	1
SRC	0.0175439	0.0235294	0.0196078	1	1	1	1	1	1
AKT1	0	0.0235294	0.0196078	0.516032	1	1	1	0.472222	1
CCND3	0	0.0235294	0.0196078	0.516032	1	1	1	0.472222	1
KDM6A	0	0.0235294	0.0196078	0.516032	1	1	1	0.472222	1
TBX3	0	0.0235294	0.0196078	0.516032	1	1	1	0.472222	1
BRCA1	0.0175439	0.0235294	0.0392157	1	1	0.630532	1	0.601305	1
BAP1	0	0.0235294	0.0196078	0.516032	1	1	1	0.472222	1
FANCA	0.0175439	0.0235294	0	1	1	0.527778	1	1	1
PRKCI	0.0175439	0.0235294	0	1	1	0.527778	1	1	1
ARAF	0	0.0235294	0	0.516032	1	0.527778	1	1	1
CHEK2	0	0.0235294	0	0.516032	1	0.527778	1	1	1
EP300	0	0.0235294	0	0.516032	1	0.527778	1	1	1
AMER1	0	0.0235294	0	0.516032	1	0.527778	1	1	1
RAD51D	0	0.0235294	0	0.516032	1	0.527778	1	1	1
MAP3K1	0.0877193	0.0117647	0.0588235	0.0383338	1	0.148163	1	0.719586	1
SMARCA4	0.0350877	0.0117647	0.0588235	0.564429	1	0.148163	1	0.66532	1
NFKBIA	0.0350877	0.0117647	0.0392157	0.564429	1	0.55597	1	1	1
CTNNB1	0	0.0117647	0.0392157	1	1	0.55597	1	0.220665	1
PTEN	0.0350877	0.0117647	0.0392157	0.564429	1	0.55597	1	1	1
KDM5A	0.0350877	0.0117647	0.0392157	0.564429	1	0.55597	1	1	1
MYCL	0	0.0117647	0.0392157	1	1	0.55597	1	0.220665	1
BCL2L1	0.0701754	0.0117647	0.0196078	0.157485	1	1	1	0.367151	1
AXL	0.0175439	0.0117647	0.0196078	1	1	1	1	1	1
CDK6	0.0175439	0.0117647	0.0196078	1	1	1	1	1	1
CBFB	0	0.0117647	0.0196078	1	1	1	1	0.472222	1
SPEN	0	0.0117647	0.0196078	1	1	1	1	0.472222	1
EPHB4	0.0526316	0.0117647	0.0196078	0.302251	1	1	1	0.62029	1
NOTCH1	0.0175439	0.0117647	0.0196078	1	1	1	1	1	1
NTRK1	0.0526316	0.0117647	0	0.302251	1	1	1	0.245327	1
BRIP1	0.0350877	0.0117647	0	0.564429	1	1	1	0.496885	1
MSH6	0.0175439	0.0117647	0	1	1	1	1	1	1
ASXL1	0	0.0117647	0	1	1	1	1	1	1
AXIN1	0	0.0117647	0	1	1	1	1	1	1
BARD1	0	0.0117647	0	1	1	1	1	1	1
BCL2L2	0	0.0117647	0	1	1	1	1	1	1
CBL	0	0.0117647	0	1	1	1	1	1	1
CDC73	0	0.0117647	0	1	1	1	1	1	1
CIC	0	0.0117647	0	1	1	1	1	1	1
EPHB1	0	0.0117647	0	1	1	1	1	1	1
ETV6	0	0.0117647	0	1	1	1	1	1	1
FGF14	0	0.0117647	0	1	1	1	1	1	1
FLT3	0	0.0117647	0	1	1	1	1	1	1
GNA13	0	0.0117647	0	1	1	1	1	1	1
HNF1A	0	0.0117647	0	1	1	1	1	1	1
IRS2	0	0.0117647	0	1	1	1	1	1	1
MEN1	0	0.0117647	0	1	1	1	1	1	1
MLH1	0	0.0117647	0	1	1	1	1	1	1
MTOR	0	0.0117647	0	1	1	1	1	1	1
NBN	0	0.0117647	0	1	1	1	1	1	1
NRAS	0	0.0117647	0	1	1	1	1	1	1
PIK3CB	0	0.0117647	0	1	1	1	1	1	1
PMS2	0	0.0117647	0	1	1	1	1	1	1
RAD51B	0	0.0117647	0	1	1	1	1	1	1
RNF43	0	0.0117647	0	1	1	1	1	1	1
SMAD2	0	0.0117647	0	1	1	1	1	1	1
SMO	0	0.0117647	0	1	1	1	1	1	1
STAG2	0	0.0117647	0	1	1	1	1	1	1
STAT3	0	0.0117647	0	1	1	1	1	1	1
FAS	0	0.0117647	0	1	1	1	1	1	1
EGFR	0	0	0.0784314	1	1	0.0183294	1	0.046631	1
MITF	0.0175439	0	0.0588235	0.401408	1	0.0507877	1	0.341837	1
NOTCH2	0.0175439	0	0.0392157	0.401408	1	0.138889	1	0.601305	1
MET	0	0	0.0392157	1	1	0.138889	1	0.220665	1
EPHA3	0.0350877	0	0.0196078	0.159425	1	0.375	1	1	1
ERBB3	0.0350877	0	0.0196078	0.159425	1	0.375	1	1	1
CREBBP	0.0175439	0	0.0196078	0.401408	1	0.375	1	1	1
HGF	0.0175439	0	0.0196078	0.401408	1	0.375	1	1	1
IGF1R	0.0175439	0	0.0196078	0.401408	1	0.375	1	1	1
MDM4	0.0175439	0	0.0196078	0.401408	1	0.375	1	1	1
PRKAR1A	0.0175439	0	0.0196078	0.401408	1	0.375	1	1	1
TSC2	0.0175439	0	0.0196078	0.401408	1	0.375	1	1	1
ATR	0	0	0.0196078	1	1	0.375	1	0.472222	1
CASP8	0	0	0.0196078	1	1	0.375	1	0.472222	1
EZH2	0	0	0.0196078	1	1	0.375	1	0.472222	1
PBRM1	0	0	0.0196078	1	1	0.375	1	0.472222	1
U2AF1	0	0	0.0196078	1	1	0.375	1	0.472222	1
JAK2	0.0175439	0	0.0392157	0.401408	1	0.138889	1	0.601305	1
CD274	0.0175439	0	0.0392157	0.401408	1	0.138889	1	0.601305	1
PDCD1LG2	0.0175439	0	0.0392157	0.401408	1	0.138889	1	0.601305	1
DNMT3A	0.0350877	0	0.0196078	0.159425	1	0.375	1	1	1
CDK8	0.0175439	0	0.0196078	0.401408	1	0.375	1	1	1
SMAD4	0.0175439	0	0.0196078	0.401408	1	0.375	1	1	1
BRD4	0	0	0.0196078	1	1	0.375	1	0.472222	1
MAP3K13	0	0	0.0196078	1	1	0.375	1	0.472222	1
NF2	0	0	0.0196078	1	1	0.375	1	0.472222	1
PTCH1	0	0	0.0196078	1	1	0.375	1	0.472222	1
REL	0.0526316	0	0	0.0626311	1	1	1	0.245327	1
ATRX	0.0350877	0	0	0.159425	1	1	1	0.496885	1
KMT2D	0.0350877	0	0	0.159425	1	1	1	0.496885	1
MUTYH	0.0350877	0	0	0.159425	1	1	1	0.496885	1
NKX2-1	0.0350877	0	0	0.159425	1	1	1	0.496885	1
APC	0.0175439	0	0	0.401408	1	1	1	1	1
BRAF	0.0175439	0	0	0.401408	1	1	1	1	1
CARD11	0.0175439	0	0	0.401408	1	1	1	1	1
CRKL	0.0175439	0	0	0.401408	1	1	1	1	1
CTCF	0.0175439	0	0	0.401408	1	1	1	1	1
FGFR2	0.0175439	0	0	0.401408	1	1	1	1	1
KDM5C	0.0175439	0	0	0.401408	1	1	1	1	1
MAP2K2	0.0175439	0	0	0.401408	1	1	1	1	1
MSH2	0.0175439	0	0	0.401408	1	1	1	1	1
NTRK3	0.0175439	0	0	0.401408	1	1	1	1	1
PIK3R1	0.0175439	0	0	0.401408	1	1	1	1	1
SETD2	0.0175439	0	0	0.401408	1	1	1	1	1

## Sheet: FDR ER-HER2-
Prevalence of ER-/HER2- >0.5%: Genes with prevalence more than 0.5% in any cohort and Benjamini-Hochberg p-value
Gene	% var local	% var brain met	% var other met	pval brain met vs BC	Benjamini-Hochberg P-value BM vs BC	pval brain met vs other met	Benjamini-Hochberg P-value BM vs Other Met	pval other met vs BC	Benjamini-Hochberg P-value Other Met vs BC
TP53	0.883761	0.90604	0.714777	0.360827	0.849895	2.09662e-09	4.19324e-07	1.3361e-09	2.49793e-07
MYC	0.309402	0.312081	0.19244	0.938819	1	0.000899919	0.0449959	0.000203368	0.00813471
PIK3CA	0.188034	0.234899	0.295533	0.111911	0.491529	0.112254	0.550362	0.000409936	0.0117124
PTEN	0.136752	0.218121	0.161512	0.00280612	0.110986	0.0928388	0.54611	0.359258	0.855376
RB1	0.147009	0.154362	0.158076	0.765574	1	0.910153	1	0.688797	1
BRCA1	0.0717949	0.144295	0.0446735	0.0010073	0.0737173	3.42782e-05	0.00228521	0.139538	0.536685
CDKN2A	0.0632479	0.137584	0.0893471	0.000389725	0.0737173	0.0700877	0.438048	0.166586	0.599283
MCL1	0.100855	0.11745	0.0549828	0.488964	0.917116	0.00806262	0.132122	0.0213463	0.251133
NF1	0.0615385	0.104027	0.113402	0.0309305	0.294576	0.791445	1	0.0108658	0.144877
CDKN2B	0.042735	0.100671	0.0652921	0.00110576	0.0737173	0.136495	0.563849	0.187977	0.626589
CCNE1	0.107692	0.0973154	0.0515464	0.726907	1	0.0412221	0.374747	0.00545375	0.0839039
CCND3	0.0410256	0.090604	0.0274914	0.00367865	0.110986	0.00140346	0.0561383	0.3467	0.84561
PIK3R1	0.0615385	0.0872483	0.0549828	0.165241	0.590145	0.150124	0.600497	0.763059	1
JAK2	0.0307692	0.0805369	0.0412371	0.00217227	0.108613	0.057807	0.407048	0.43412	0.906447
VEGFA	0.0393162	0.0805369	0.0274914	0.0163844	0.234062	0.00569755	0.122701	0.441066	0.909263
CD274	0.034188	0.0771812	0.0378007	0.00751001	0.166889	0.0511103	0.407048	0.846506	1
PDCD1LG2	0.0358974	0.0771812	0.0343643	0.013138	0.234062	0.0305392	0.321465	1	1
EGFR	0.042735	0.0671141	0.0584192	0.144571	0.545551	0.735313	1	0.316648	0.822463
PRKCI	0.0358974	0.0671141	0.0309278	0.0427269	0.303454	0.0556552	0.407048	0.844307	1
NTRK1	0.0324786	0.0671141	0.024055	0.0235491	0.277049	0.0167481	0.218402	0.672892	1
AKT2	0.034188	0.0637584	0.0446735	0.055646	0.347787	0.36479	0.879186	0.454631	0.909263
AKT3	0.0444444	0.0637584	0.0274914	0.256976	0.745255	0.0473871	0.407048	0.267286	0.722395
CCND1	0.0564103	0.0604027	0.127148	0.878893	1	0.00674853	0.122701	0.000497912	0.0124478
BRCA2	0.0358974	0.0604027	0.0446735	0.117934	0.491529	0.462037	0.926094	0.578281	0.940294
NOTCH1	0.0495726	0.0604027	0.0446735	0.527287	0.917116	0.462037	0.926094	0.867107	1
FGF3	0.0512821	0.057047	0.116838	0.751992	1	0.0122548	0.175068	0.000805387	0.0178975
FGF4	0.0461538	0.057047	0.113402	0.514221	0.917116	0.0174721	0.218402	0.000336791	0.0112264
KDM5A	0.0700855	0.057047	0.0412371	0.565756	0.919377	0.44774	0.926094	0.0993455	0.497491
ARID1A	0.0358974	0.057047	0.0446735	0.161251	0.586366	0.575525	0.99104	0.578281	0.940294
LYN	0.0752137	0.057047	0.04811	0.39975	0.856091	0.713333	1	0.149597	0.564517
NOTCH3	0.042735	0.057047	0.0378007	0.403155	0.856091	0.334099	0.86779	0.857136	1
PARP1	0.0376068	0.057047	0.0309278	0.224661	0.710241	0.159919	0.606551	0.700768	1
KMT2D	0.0290598	0.057047	0.0274914	0.0624286	0.378355	0.100903	0.550362	1	1
CREBBP	0.042735	0.057047	0.024055	0.403155	0.856091	0.059022	0.407048	0.185388	0.626589
FGF19	0.0478632	0.0536913	0.120275	0.74438	1	0.00502224	0.122701	0.000155628	0.00778142
KRAS	0.0632479	0.0536913	0.0549828	0.654186	0.976398	1	1	0.763681	1
TERC	0.0410256	0.0536913	0.0309278	0.396156	0.856091	0.220288	0.672515	0.573063	0.940294
IGF1R	0.0153846	0.0503356	0.024055	0.00388452	0.110986	0.127114	0.552668	0.423578	0.906447
MAP3K1	0.017094	0.0469799	0.0309278	0.0146309	0.234062	0.396205	0.910817	0.219016	0.705432
SOX2	0.0153846	0.0469799	0.024055	0.00724412	0.166889	0.181923	0.661539	0.423578	0.906447
CUL4A	0.0188034	0.0469799	0.0137457	0.0294047	0.294047	0.0286195	0.317995	0.783842	1
ZNF703	0.0444444	0.0436242	0.103093	1	1	0.00666094	0.122701	0.00118848	0.019808
CCND2	0.0564103	0.0436242	0.0274914	0.522167	0.917116	0.375313	0.879186	0.0620842	0.400543
CDK6	0.025641	0.0436242	0.0343643	0.158672	0.586366	0.671979	1	0.519338	0.940294
IRS2	0.0222222	0.0436242	0.0206186	0.0916905	0.491529	0.160736	0.606551	1	1
FGFR1	0.0683761	0.0402685	0.0996564	0.0985013	0.491529	0.00550735	0.122701	0.111272	0.497491
FGF23	0.0547009	0.0402685	0.024055	0.415204	0.856091	0.351989	0.879186	0.0379286	0.305095
FGF6	0.0547009	0.0402685	0.024055	0.415204	0.856091	0.351989	0.879186	0.0379286	0.305095
CTNNA1	0.0393162	0.0402685	0.0171821	1	1	0.138143	0.563849	0.101895	0.497491
KIT	0.0136752	0.0402685	0.0137457	0.0162201	0.234062	0.0731845	0.443542	1	1
PDGFRA	0.017094	0.0402685	0.0103093	0.0419734	0.303454	0.0330975	0.330975	0.561046	0.940294
FGFR2	0.0358974	0.0369128	0.0412371	1	1	0.833964	1	0.708534	1
ZNF217	0.025641	0.0369128	0.0274914	0.400547	0.856091	0.642567	1	0.826758	1
FAS	0.0119658	0.0369128	0.0171821	0.020806	0.260074	0.204358	0.672515	0.546127	0.940294
BAP1	0.0290598	0.0369128	0.0137457	0.545816	0.917116	0.114176	0.550362	0.24005	0.705432
KDR	0.0119658	0.0369128	0.00687285	0.020806	0.260074	0.0211698	0.249057	0.725463	1
MDM4	0.0239316	0.033557	0.0343643	0.391453	0.856091	1	1	0.384636	0.895805
FGF12	0.0102564	0.033557	0.024055	0.0286581	0.294047	0.624355	0.99104	0.138429	0.536685
GNAS	0.034188	0.033557	0.0343643	1	1	1	1	1	1
ATM	0.0102564	0.033557	0.0274914	0.0286581	0.294047	0.811877	1	0.0821066	0.497491
PIK3C2B	0.0273504	0.0302013	0.04811	0.831626	1	0.292982	0.771005	0.117964	0.501975
AURKA	0.0205128	0.0302013	0.0171821	0.361205	0.849895	0.41875	0.926094	1	1
BCL2L1	0.0188034	0.0302013	0.00687285	0.339027	0.825088	0.0631757	0.421171	0.238966	0.705432
TBX3	0.0102564	0.0268456	0.04811	0.0848996	0.48514	0.196914	0.672515	0.00101818	0.0185124
MAP2K4	0.0153846	0.0268456	0.0309278	0.300116	0.811124	0.809883	1	0.135361	0.536685
BRAF	0.0153846	0.0268456	0.0446735	0.300116	0.811124	0.272677	0.727139	0.0118728	0.14841
PIK3CB	0.0188034	0.0268456	0.00687285	0.466107	0.905062	0.106634	0.550362	0.238966	0.705432
ETV6	0.0153846	0.0268456	0.00343643	0.300116	0.811124	0.0377541	0.359563	0.178278	0.614753
CDH1	0.017094	0.0234899	0.113402	0.60549	0.919377	1.12255e-05	0.00112255	2.49793e-09	2.49793e-07
AKT1	0.0239316	0.0234899	0.0446735	1	1	0.177259	0.656515	0.100436	0.497491
STK11	0.0205128	0.0234899	0.0171821	0.808163	1	0.772279	1	1	1
SPEN	0.0188034	0.0234899	0.0137457	0.62301	0.936857	0.545278	0.97371	0.783842	1
MSH6	0.0119658	0.0234899	0.0171821	0.253576	0.745255	0.772279	1	0.546127	0.940294
ERBB2	0.0153846	0.0201342	0.0412371	0.591957	0.919377	0.156291	0.606551	0.0317301	0.305095
MDM2	0.025641	0.0201342	0.0378007	0.815834	1	0.226224	0.672515	0.397607	0.895805
EMSY	0.0136752	0.0201342	0.0309278	0.569912	0.919377	0.443838	0.926094	0.115573	0.501975
NFKBIA	0.0102564	0.0201342	0.024055	0.234379	0.710241	0.785979	1	0.138429	0.536685
HGF	0.0222222	0.0201342	0.024055	1	1	0.785979	1	0.815442	1
RAF1	0.0102564	0.0201342	0.0206186	0.234379	0.710241	1	1	0.227559	0.705432
NOTCH2	0.0495726	0.0201342	0.0206186	0.0432373	0.303454	1	1	0.0435465	0.305095
RICTOR	0.0188034	0.0201342	0.0171821	1	1	1	1	1	1
KDM6A	0.0410256	0.0201342	0.0206186	0.118749	0.491529	1	1	0.165992	0.599283
PALB2	0.0153846	0.0201342	0.0137457	0.591957	0.919377	0.75197	1	1	1
FGF14	0.00512821	0.0201342	0.0103093	0.068274	0.401612	0.504721	0.926094	0.40492	0.895805
APC	0.017094	0.0201342	0.00343643	0.791862	1	0.122954	0.550362	0.111936	0.497491
GATA3	0.0153846	0.0167785	0.0584192	1	1	0.00858794	0.132122	0.000993709	0.0185124
IKBKE	0.0136752	0.0167785	0.0378007	0.770387	1	0.13398	0.563849	0.0267596	0.297329
FGFR4	0.00512821	0.0167785	0.0274914	0.127797	0.491529	0.413767	0.926094	0.00825531	0.117933
DNMT3A	0.0188034	0.0167785	0.0206186	1	1	0.76989	1	0.801462	1
RPTOR	0.025641	0.0167785	0.0206186	0.480458	0.917116	0.76989	1	0.815657	1
ATR	0.00512821	0.0167785	0.0206186	0.127797	0.491529	0.76989	1	0.0667895	0.417434
BCL2L2	0.00683761	0.0167785	0.0137457	0.174219	0.611296	1	1	0.45124	0.909263
MUTYH	0.0188034	0.0167785	0.0103093	1	1	0.724845	1	0.407591	0.895805
BRIP1	0.0034188	0.0167785	0.0137457	0.0470354	0.303454	1	1	0.0982616	0.497491
FBXW7	0.0222222	0.0167785	0.0137457	0.801855	1	1	1	0.449516	0.909263
ARFRP1	0.0119658	0.0167785	0.0137457	0.551444	0.917116	1	1	0.759633	1
ROS1	0.0102564	0.0167785	0.0103093	0.522223	0.917116	0.724845	1	1	1
BRD4	0.00854701	0.0167785	0.0103093	0.318542	0.825088	0.724845	1	0.725146	1
ATRX	0.00512821	0.0167785	0.0103093	0.127797	0.491529	0.724845	1	0.40492	0.895805
FGF10	0.0119658	0.0167785	0.00687285	0.551444	0.917116	0.450555	0.926094	0.725463	1
TSC2	0.0119658	0.0167785	0.00687285	0.551444	0.917116	0.450555	0.926094	0.725463	1
BARD1	0.00854701	0.0167785	0.00687285	0.318542	0.825088	0.450555	0.926094	1	1
RAD51B	0.00512821	0.0167785	0.00343643	0.127797	0.491529	0.216554	0.672515	1	1
ESR1	0.00683761	0.0134228	0.0584192	0.453589	0.889389	0.00338501	0.112834	7.5722e-06	0.000504813
CHEK2	0.0136752	0.0134228	0.0206186	1	1	0.540957	0.97371	0.567933	0.940294
KEL	0.00683761	0.0134228	0.024055	0.453589	0.889389	0.37805	0.879186	0.0483898	0.322599
SMARCA4	0.0153846	0.0134228	0.0206186	1	1	0.540957	0.97371	0.586992	0.943098
FANCA	0.0205128	0.0134228	0.0171821	0.597419	0.919377	0.749377	1	1	1
EP300	0.0153846	0.0134228	0.0171821	1	1	0.749377	1	0.783591	1
SMAD4	0.00512821	0.0134228	0.0171821	0.234212	0.710241	0.749377	1	0.124733	0.519722
MYCL	0.0153846	0.0134228	0.0137457	1	1	1	1	1	1
MSH2	0.0119658	0.0134228	0.0103093	1	1	1	1	1	1
RET	0.0188034	0.0134228	0.00687285	0.783989	1	0.686031	1	0.238966	0.705432
CTNNB1	0.0136752	0.0134228	0.00687285	1	1	0.686031	1	0.510094	0.940294
EZH2	0.0102564	0.0134228	0.00687285	0.740287	1	0.686031	1	1	1
CDK12	0.00683761	0.0134228	0.00687285	0.453589	0.889389	0.686031	1	1	1
ASXL1	0.00683761	0.0134228	0.00687285	0.453589	0.889389	0.686031	1	1	1
EPHB1	0.00512821	0.0134228	0.00687285	0.234212	0.710241	0.686031	1	0.669274	1
INPP4B	0.00512821	0.0134228	0.00687285	0.234212	0.710241	0.686031	1	0.669274	1
PRDM1	0.0102564	0.0134228	0.00343643	0.740287	1	0.373046	0.879186	0.435094	0.906447
KDM5C	0.00512821	0.0134228	0.00343643	0.234212	0.710241	0.373046	0.879186	1	1
MLH1	0.0017094	0.0134228	0.00343643	0.0468739	0.303454	0.373046	0.879186	0.554286	0.940294
ACVR1B	0.00512821	0.0134228	0	0.234212	0.710241	0.123832	0.550362	0.554796	0.940294
MAP3K13	0.0034188	0.0134228	0	0.187364	0.646081	0.123832	0.550362	1	1
ALK	0.0017094	0.0134228	0	0.0468739	0.303454	0.123832	0.550362	1	1
IKZF1	0	0.0134228	0	0.0127997	0.234062	0.123832	0.550362	1	1
TERT	0.00683761	0.0100671	0.0171821	0.693693	0.983961	0.500135	0.926094	0.167799	0.599283
AR	0.0034188	0.0100671	0.0171821	0.342412	0.825088	0.500135	0.926094	0.0439593	0.305095
CDK4	0.00854701	0.0100671	0.0137457	1	1	0.721979	1	0.489738	0.940294
MET	0.0034188	0.0100671	0.0137457	0.342412	0.825088	0.721979	1	0.0982616	0.497491
SUFU	0	0.0100671	0.0103093	0.038182	0.303454	1	1	0.0364054	0.305095
NBN	0	0.0100671	0.0103093	0.038182	0.303454	1	1	0.0364054	0.305095
CIC	0.0153846	0.0100671	0.00687285	0.760041	1	1	1	0.35387	0.852699
MYCN	0.0136752	0.0100671	0.00687285	0.758657	1	1	1	0.510094	0.940294
TSC1	0.0119658	0.0100671	0.00687285	1	1	1	1	0.725463	1
GATA6	0.00854701	0.0100671	0.00687285	1	1	1	1	1	1
EPHB4	0.0136752	0.0100671	0.0103093	0.758657	1	1	1	1	1
REL	0.0136752	0.0100671	0.0103093	0.758657	1	1	1	1	1
PAX5	0.0034188	0.0100671	0.00687285	0.342412	0.825088	1	1	0.603583	0.943098
BCORL1	0.00683761	0.0100671	0.00343643	0.693693	0.983961	0.623828	0.99104	1	1
PRKN	0.00683761	0.0100671	0.00343643	0.693693	0.983961	0.623828	0.99104	1	1
QKI	0.00683761	0.0100671	0.00343643	0.693693	0.983961	0.623828	0.99104	1	1
SETD2	0.00512821	0.0100671	0.00343643	0.411318	0.856091	0.623828	0.99104	1	1
VHL	0.0034188	0.0100671	0.00343643	0.342412	0.825088	0.623828	0.99104	1	1
ERBB4	0.0017094	0.0100671	0.00343643	0.114329	0.491529	0.623828	0.99104	0.554286	0.940294
HNF1A	0.0017094	0.0100671	0.00343643	0.114329	0.491529	0.623828	0.99104	0.554286	0.940294
TNFAIP3	0	0.0100671	0.00343643	0.038182	0.303454	0.623828	0.99104	0.332192	0.830479
PTCH1	0	0.0100671	0.00343643	0.038182	0.303454	0.623828	0.99104	0.332192	0.830479
PBRM1	0.0119658	0.0100671	0	1	1	0.248831	0.672515	0.102486	0.497491
SMARCB1	0.00683761	0.0100671	0	0.693693	0.983961	0.248831	0.672515	0.3078	0.81
FANCC	0.00512821	0.0100671	0	0.411318	0.856091	0.248831	0.672515	0.554796	0.940294
NRAS	0.00512821	0.0100671	0	0.411318	0.856091	0.248831	0.672515	0.554796	0.940294
PMS2	0.00512821	0.0100671	0	0.411318	0.856091	0.248831	0.672515	0.554796	0.940294
CDKN1B	0.0034188	0.0100671	0	0.342412	0.825088	0.248831	0.672515	1	1
JAK1	0.0017094	0.0100671	0	0.114329	0.491529	0.248831	0.672515	1	1
STAG2	0.0034188	0.00671141	0.0137457	0.606789	0.919377	0.445666	0.926094	0.0982616	0.497491
SOX9	0.0034188	0.00671141	0.0103093	0.606789	0.919377	0.682772	1	0.339684	0.838725
CASP8	0	0.00671141	0.0103093	0.113643	0.491529	0.682772	1	0.0364054	0.305095
MAP2K1	0.0017094	0.00671141	0.00687285	0.264565	0.745255	1	1	0.257483	0.705432
CTCF	0.00854701	0.00671141	0.00687285	1	1	1	1	1	1
CBL	0.0034188	0.00671141	0.00687285	0.606789	0.919377	1	1	0.603583	0.943098
RAD51D	0	0.00671141	0.00687285	0.113643	0.491529	1	1	0.110098	0.497491
NF2	0.0136752	0.00671141	0.00343643	0.50872	0.917116	1	1	0.285255	0.76068
AXL	0.00854701	0.00671141	0.00343643	1	1	1	1	0.669653	1
HRAS	0.00512821	0.00671141	0.00343643	1	1	1	1	1	1
MEN1	0.00512821	0.00671141	0.00343643	1	1	1	1	1	1
FUBP1	0.0034188	0.00671141	0.00343643	0.606789	0.919377	1	1	1	1
RAD51C	0.0034188	0.00671141	0.00343643	0.606789	0.919377	1	1	1	1
MTOR	0.0017094	0.00671141	0.00343643	0.264565	0.745255	1	1	0.554286	0.940294
PTPN11	0.0017094	0.00671141	0.00343643	0.264565	0.745255	1	1	0.554286	0.940294
GID4	0.00512821	0.00671141	0.00343643	1	1	1	1	1	1
ERRFI1	0.00512821	0.00671141	0.00343643	1	1	1	1	1	1
BCL2	0.00854701	0.00671141	0	1	1	0.49922	0.926094	0.176302	0.614753
ARAF	0.00512821	0.00671141	0	1	1	0.49922	0.926094	0.554796	0.940294
FLT3	0.00512821	0.00671141	0	1	1	0.49922	0.926094	0.554796	0.940294
DIS3	0	0.00671141	0	0.113643	0.491529	0.49922	0.926094	1	1
KMT2A	0	0.00671141	0	0.113643	0.491529	0.49922	0.926094	1	1
POLE	0	0.00671141	0	0.113643	0.491529	0.49922	0.926094	1	1
EPHA3	0.00854701	0.0033557	0.0206186	0.669742	0.983961	0.0658022	0.42453	0.193903	0.635746
CRKL	0.0034188	0.0033557	0.0171821	1	1	0.119082	0.550362	0.0439593	0.305095
ERBB3	0.0017094	0.0033557	0.0137457	1	1	0.211698	0.672515	0.0442387	0.305095
FGFR3	0.0017094	0.0033557	0.0137457	1	1	0.211698	0.672515	0.0442387	0.305095
AMER1	0.00512821	0.0033557	0.0103093	1	1	0.367858	0.879186	0.40492	0.895805
NKX2-1	0.0034188	0.0033557	0.00687285	1	1	0.619936	0.99104	0.603583	0.943098
SRC	0.0017094	0.0033557	0.00687285	1	1	0.619936	0.99104	0.257483	0.705432
CEBPA	0.0017094	0.0033557	0.00687285	1	1	0.619936	0.99104	0.257483	0.705432
BCOR	0.0102564	0.0033557	0.00343643	0.433604	0.884905	1	1	0.435094	0.906447
CSF1R	0.00854701	0.0033557	0.00343643	0.669742	0.983961	1	1	0.669653	1
KEAP1	0.00512821	0	0.0103093	0.554855	0.917116	0.119966	0.550362	0.40492	0.895805
TET2	0.00512821	0	0.0137457	0.554855	0.917116	0.0589594	0.407048	0.229191	0.705432
CBFB	0.0034188	0	0.0137457	0.552315	0.917116	0.0589594	0.407048	0.0982616	0.497491
RNF43	0.00512821	0	0.00687285	0.554855	0.917116	0.243668	0.672515	0.669274	1
CYP17A1	0.0017094	0	0.00687285	1	1	0.243668	0.672515	0.257483	0.705432
SDHB	0.0017094	0	0.00687285	1	1	0.243668	0.672515	0.257483	0.705432
PDGFRB	0	0	0.00687285	1	1	0.243668	0.672515	0.110098	0.497491
FLCN	0.0034188	0	0.00687285	0.552315	0.917116	0.243668	0.672515	0.603583	0.943098
IRF2	0.00683761	0	0.00343643	0.306316	0.816844	0.494058	0.926094	1	1
SF3B1	0.00512821	0	0.00343643	0.554855	0.917116	0.494058	0.926094	1	1
CDK8	0.00512821	0	0	0.554855	0.917116	1	1	0.554796	0.940294
