# Supplementary material for: Breast cancer brain metastases genomic profiling identifies alterations targetable by immune-checkpoint and PARP inhibitors
Source: NPJ Precis Oncol. 2024 Dec 20;8:282. doi: 10.1038/s41698-024-00761-0 (PMC11662007; doi:10.1038/s41698-024-00761-0)
Supplement: Supplementary file 3 — Supplementary Data 2 [file 41698_2024_761_MOESM3_ESM.xlsx]

## Sheet: DetailPrev SV>0.5%
SV Prevalence >0.5%: Genes with prevalence more than 0.5% in any cohort
Gene	# local	# var local	% var local	# brain met	# var brain met	% var brain met	# other met	# var other met	% var other met	OR brain met vs local	pval brain met vs local	OR brain met vs other met	pval brain met vs other met	OR other met vs local	pval other met vs local
TP53_SV	11988	6917	0.576994	822	581	0.706813	15516	6653	0.428783	1.7674	1.11572e-13	3.21161	2.16876e-55	0.550317	1.12466e-131
PIK3CA_SV	11988	3674	0.306473	822	218	0.265207	15516	5910	0.380897	0.816752	0.013477	0.586644	1.08845e-11	1.39225	6.49257e-38
GATA3_SV	11988	983	0.0819987	822	70	0.0851582	15516	1767	0.113882	1.04212	0.742729	0.724294	0.0106724	1.43881	1.45808e-18
PTEN_SV	11988	912	0.0760761	822	57	0.0693431	15516	1036	0.0667698	0.904902	0.539247	1.04141	0.774321	0.868919	0.00304305
BRCA1_SV	11988	402	0.0335335	822	55	0.06691	15516	393	0.0253287	2.06669	5.80141e-06	2.75939	8.47947e-10	0.748966	6.41074e-05
ARID1A_SV	11988	515	0.0429596	822	53	0.0644769	15516	1074	0.0692189	1.53539	0.00635742	0.926771	0.671592	1.65671	7.47747e-21
NF1_SV	11988	463	0.038622	822	50	0.0608273	15516	765	0.0493039	1.61218	0.0030832	1.24886	0.138926	1.29092	1.93973e-05
BRCA2_SV	11988	429	0.0357858	822	42	0.0510949	15516	653	0.0420856	1.45083	0.0275135	1.2256	0.213886	1.18378	0.00783549
ESR1_SV	11988	267	0.0222723	822	39	0.0474453	15516	2950	0.190126	2.18653	4.28404e-05	0.212167	5.31499e-32	10.3057	0
PIK3R1_SV	11988	386	0.0321989	822	34	0.0413625	15516	367	0.023653	1.29688	0.155878	1.78103	0.00347669	0.728161	2.08751e-05
RB1_SV	11988	553	0.0461295	822	32	0.0389294	15516	668	0.0430523	0.837595	0.387514	0.900356	0.658209	0.930293	0.226173
CDH1_SV	11988	1086	0.0905906	822	31	0.0377129	15516	2095	0.135022	0.393425	1.40749e-08	0.251065	3.7309e-20	1.56702	9.02437e-31
MAP3K1_SV	11988	525	0.0437938	822	31	0.0377129	15516	933	0.0601315	0.855705	0.478509	0.612563	0.00615333	1.39693	1.59733e-09
ERBB2_SV	11988	343	0.0286119	822	26	0.0316302	15516	610	0.0393143	1.10893	0.589815	0.798163	0.308315	1.38936	1.37332e-06
ATM_SV	11988	267	0.0222723	822	24	0.0291971	15516	419	0.0270044	1.32027	0.224284	1.08364	0.659683	1.21836	0.0125839
KMT2D_SV	11988	222	0.0185185	822	24	0.0291971	15516	247	0.0159191	1.59398	0.035538	1.85918	0.00708739	0.857358	0.100393
TBX3_SV	11988	385	0.0321154	822	24	0.0291971	15516	632	0.0407321	0.906396	0.75799	0.70829	0.120154	1.2797	0.000183088
NOTCH1_SV	11988	205	0.0171004	822	21	0.0255474	15516	205	0.0132122	1.50692	0.0978551	1.95811	0.00806701	0.769577	0.00902709
SPEN_SV	11988	242	0.0201869	822	20	0.0243309	15516	357	0.0230085	1.2104	0.442945	1.05891	0.810997	1.14307	0.113596
KRAS_SV	11988	168	0.014014	822	19	0.0231144	15516	399	0.0257154	1.66474	0.0483914	0.89646	0.734054	1.85702	5.68096e-12
CREBBP_SV	11988	182	0.0151818	822	16	0.0194647	15516	161	0.0103764	1.2877	0.307208	1.89325	0.0225834	0.680154	0.000439346
AKT1_SV	11988	446	0.0372039	822	15	0.0182482	15516	676	0.0435679	0.481021	0.0034703	0.408042	0.000165703	1.17885	0.00820067
PALB2_SV	11988	146	0.0121788	822	15	0.0182482	15516	188	0.0121165	1.50761	0.142378	1.51546	0.142115	0.99482	1
CDKN2A_SV	11988	161	0.0134301	822	14	0.0170316	15516	226	0.0145656	1.27282	0.352477	1.17224	0.550183	1.0858	0.439113
EP300_SV	11988	80	0.00667334	822	13	0.0158151	15516	88	0.00567156	2.3919	0.0083066	2.81723	0.00163276	0.849028	0.310552
MAP2K4_SV	11988	229	0.0191024	822	13	0.0158151	15516	425	0.0273911	0.825144	0.596498	0.57059	0.045411	1.44612	7.46642e-06
NOTCH3_SV	11988	86	0.00717384	822	13	0.0158151	15516	106	0.00683166	2.22391	0.0118679	2.3361	0.00895001	0.951973	0.770328
KDM6A_SV	11988	129	0.0107608	822	12	0.0145985	15516	142	0.00915184	1.36193	0.297776	1.60396	0.133603	0.849102	0.196052
MUTYH_SV	11988	192	0.016016	822	12	0.0145985	15516	288	0.0185615	0.910185	0.885513	0.783333	0.504346	1.16194	0.114458
NOTCH2_SV	11988	178	0.0148482	822	12	0.0145985	15516	173	0.0111498	0.982938	1	1.31389	0.393895	0.74811	0.00786174
SMARCA4_SV	11988	55	0.00458792	822	12	0.0145985	15516	109	0.00702501	3.21428	0.00102172	2.09405	0.0206634	1.53495	0.00911557
STK11_SV	11988	124	0.0103437	822	12	0.0145985	15516	144	0.00928074	1.41744	0.286895	1.58148	0.137146	0.896276	0.386473
ASXL1_SV	11988	81	0.00675676	822	11	0.013382	15516	135	0.0087007	1.99383	0.0492119	1.54533	0.178235	1.29023	0.0733967
ATRX_SV	11988	81	0.00675676	822	11	0.013382	15516	101	0.00650941	1.99383	0.0492119	2.07011	0.028408	0.963153	0.822208
CHEK2_SV	11988	218	0.0181849	822	11	0.013382	15516	410	0.0264243	0.732305	0.412434	0.499732	0.0174138	1.46539	4.92339e-06
BARD1_SV	11988	42	0.0035035	822	10	0.0121655	15516	43	0.00277133	3.50281	0.00150718	4.43149	0.000267392	0.790437	0.324194
BCORL1_SV	11988	52	0.00433767	822	10	0.0121655	15516	68	0.00438257	2.82683	0.00574609	2.79774	0.00557989	1.0104	1
HNF1A_SV	11988	18	0.0015015	822	10	0.0121655	15516	17	0.00109564	8.18966	5.08696e-06	11.2279	3.79868e-07	0.729402	0.395224
TSC2_SV	11988	47	0.00392059	822	10	0.0121655	15516	78	0.00502707	3.12886	0.00307967	2.43748	0.0128008	1.28365	0.205502
ACVR1B_SV	11988	38	0.00316984	822	9	0.0109489	15516	43	0.00277133	3.48126	0.00264537	3.98344	0.00103552	0.873933	0.575624
APC_SV	11988	126	0.0105105	822	9	0.0109489	15516	187	0.0120521	1.04217	0.859381	0.907453	1	1.14846	0.251609
ATR_SV	11988	60	0.00500501	822	9	0.0109489	15516	114	0.00734725	2.20074	0.041709	1.49563	0.216192	1.47145	0.0172027
FGFR2_SV	11988	71	0.00592259	822	9	0.0109489	15516	164	0.0105697	1.85806	0.101672	1.03627	0.860767	1.79303	2.86651e-05
MSH6_SV	11988	59	0.00492159	822	9	0.0109489	15516	83	0.00534932	2.23823	0.0398814	2.05837	0.0502115	1.08738	0.671694
BAP1_SV	11988	97	0.00809142	822	8	0.00973236	15516	87	0.00560712	1.20479	0.548679	1.74295	0.149612	0.691239	0.0136957
BRIP1_SV	11988	57	0.00475475	822	8	0.00973236	15516	84	0.00541377	2.05716	0.0685045	1.80555	0.141967	1.13935	0.495998
CTNNA1_SV	11988	102	0.00850851	822	8	0.00973236	15516	96	0.00618716	1.14525	0.693852	1.57862	0.252489	0.725475	0.025711
DNMT3A_SV	11988	215	0.0179346	822	8	0.00973236	15516	373	0.0240397	0.538164	0.0962662	0.398996	0.00590569	1.34879	0.000556341
FANCC_SV	11988	41	0.00342009	822	8	0.00973236	15516	53	0.00341583	2.86379	0.0120128	2.86737	0.0110168	0.998751	1
KEL_SV	11988	51	0.00425425	822	8	0.00973236	15516	72	0.00464037	2.30033	0.0536048	2.10811	0.0635092	1.09118	0.649918
SOX9_SV	11988	43	0.00358692	822	8	0.00973236	15516	72	0.00464037	2.73013	0.0151623	2.10811	0.0635092	1.29506	0.188133
BRD4_SV	11988	47	0.00392059	822	7	0.00851582	15516	74	0.00476927	2.18214	0.0835721	1.79231	0.127837	1.21751	0.312948
ERBB3_SV	11988	128	0.0106773	822	7	0.00851582	15516	204	0.0131477	0.795821	0.723213	0.644677	0.33895	1.23445	0.0661349
FANCA_SV	11988	78	0.00650651	822	7	0.00851582	15516	101	0.00650941	1.31147	0.500185	1.31088	0.502003	1.00045	1
MLH1_SV	11988	36	0.003003	822	7	0.00851582	15516	36	0.00232019	2.85153	0.0185745	3.69325	0.00525431	0.772093	0.285693
PTCH1_SV	11988	48	0.004004	822	7	0.00851582	15516	88	0.00567156	2.1365	0.0865692	1.5058	0.33829	1.41885	0.056281
SETD2_SV	11988	83	0.00692359	822	7	0.00851582	15516	152	0.00979634	1.23195	0.518588	0.868163	0.856066	1.41903	0.00999541
SMAD4_SV	11988	117	0.00975976	822	7	0.00851582	15516	231	0.0148879	0.871449	0.854998	0.568321	0.176234	1.53337	0.000166481
ERBB4_SV	11988	26	0.00216884	822	6	0.00729927	15516	55	0.00354473	3.38292	0.0147771	2.06698	0.128009	1.63665	0.042888
MSH2_SV	11988	44	0.00367034	822	6	0.00729927	15516	48	0.00309358	1.99599	0.135138	2.36949	0.0530018	0.842373	0.461236
PRKN_SV	11988	38	0.00316984	822	6	0.00729927	15516	55	0.00354473	2.31231	0.0604293	2.06698	0.128009	1.11869	0.675471
PMS2_SV	11988	42	0.0035035	822	6	0.00729927	15516	54	0.00348028	2.09139	0.126201	2.10539	0.125108	0.993348	1
SF3B1_SV	11988	199	0.0165999	822	6	0.00729927	15516	297	0.0191415	0.435597	0.042499	0.376783	0.0109606	1.1561	0.120392
TET2_SV	11988	120	0.01001	822	6	0.00729927	15516	207	0.0133411	0.727206	0.583038	0.543798	0.15573	1.33727	0.0115636
TSC1_SV	11988	46	0.00383717	822	6	0.00729927	15516	71	0.00457592	1.90889	0.145864	1.59952	0.285469	1.19341	0.400576
CBL_SV	11988	47	0.00392059	822	5	0.00608273	15516	56	0.00360918	1.55486	0.384261	1.68954	0.234572	0.920283	0.691339
CDK12_SV	11988	60	0.00500501	822	5	0.00608273	15516	73	0.00470482	1.21665	0.609418	1.29466	0.597076	0.93974	0.726707
CDKN1B_SV	11988	128	0.0106773	822	5	0.00608273	15516	221	0.0142434	0.567052	0.283125	0.42355	0.0463111	1.33881	0.00906538
CIC_SV	11988	43	0.00358692	822	5	0.00608273	15516	63	0.00406032	1.70007	0.233831	1.50114	0.393659	1.13252	0.557159
CTCF_SV	11988	56	0.00467134	822	5	0.00608273	15516	90	0.00580046	1.30399	0.594302	1.04896	0.813636	1.24312	0.210272
AMER1_SV	11988	30	0.0025025	822	5	0.00608273	15516	55	0.00354473	2.43941	0.0707035	1.72037	0.228105	1.41795	0.126587
FBXW7_SV	11988	100	0.00834168	822	5	0.00608273	15516	106	0.00683166	0.72754	0.687249	0.889702	1	0.817734	0.158548
JAK1_SV	11988	20	0.00166834	822	5	0.00608273	15516	15	0.000966744	3.66218	0.0195028	6.32436	0.00262341	0.579059	0.124789
NRAS_SV	11988	25	0.00208542	822	5	0.00608273	15516	33	0.00212684	2.92852	0.0402367	2.87137	0.0404423	1.0199	1
PRDM1_SV	11988	41	0.00342009	822	5	0.00608273	15516	33	0.00212684	1.78329	0.217528	2.87137	0.0404423	0.62106	0.0457003
RBM10_SV	11988	17	0.00141808	822	5	0.00608273	15516	46	0.00296468	4.30953	0.0113297	2.05817	0.112272	2.09387	0.00745802
STAG2_SV	11988	64	0.00533867	822	5	0.00608273	15516	121	0.0077984	1.14022	0.802796	0.77865	0.836422	1.46436	0.0139755
TNFAIP3_SV	11988	16	0.00133467	822	5	0.00608273	15516	19	0.00122454	4.57925	0.00923244	4.99163	0.0060881	0.917387	0.865159
VHL_SV	11988	38	0.00316984	822	5	0.00608273	15516	57	0.00367363	1.92456	0.196726	1.6598	0.241297	1.15952	0.534473
BRAF_SV	11988	71	0.00592259	822	4	0.00486618	15516	137	0.0088296	0.820758	1	0.548927	0.329581	1.49521	0.00609388
CASP8_SV	11988	67	0.00558892	822	4	0.00486618	15516	89	0.00573601	0.870051	1	0.847614	1	1.02647	0.935509
CBFB_SV	11988	143	0.0119286	822	4	0.00486618	15516	249	0.016048	0.405047	0.0630889	0.29982	0.00819026	1.35097	0.00472225
GNAS_SV	11988	37	0.00308642	822	4	0.00486618	15516	50	0.00322248	1.57946	0.333416	1.51257	0.349097	1.04423	0.913895
KEAP1_SV	11988	34	0.00283617	822	4	0.00486618	15516	70	0.00451147	1.71926	0.3052	1.07901	0.788332	1.59337	0.0288585
PBRM1_SV	11988	50	0.00417084	822	4	0.00486618	15516	95	0.00612271	1.16753	0.776998	0.793772	0.819392	1.47086	0.0288401
TERT_SV	11988	177	0.0147648	822	4	0.00486618	15516	164	0.0105697	0.326302	0.014055	0.457749	0.151964	0.71284	0.00205585
MEN1_SV	11988	81	0.00675676	822	3	0.00364964	15516	194	0.0125032	0.538462	0.374152	0.289302	0.0200027	1.86125	1.60938e-06
EGFR_SV	11988	62	0.00517184	822	2	0.00243309	15516	92	0.00592936	0.469158	0.439015	0.408908	0.33603	1.14734	0.416367
HRAS_SV	11988	79	0.00658992	822	2	0.00243309	15516	74	0.00476927	0.367675	0.174814	0.508965	0.592642	0.722398	0.0495361
BCOR_SV	11988	47	0.00392059	822	0	0	15516	80	0.00515597	0	0.0731303	0	0.0347312	1.31673	0.151188

## Sheet: FDR DetailPrev SV
SV Prevalence >0.5%: Genes with prevalence more than 0.5% in any cohort and Benjamini-Hochberg p-value
Gene	% var local	% var brain met	% var other met	pval brain met vs BC	Benjamini-Hochberg P-value BM vs BC	pval brain met vs other met	Benjamini-Hochberg P-value BM vs Other Met	pval other met vs BC	Benjamini-Hochberg P-value Other Met vs BC
TP53_SV	0.576994	0.706813	0.428783	1.11572e-13	1.03762e-11	2.16876e-55	2.01695e-53	1.12466e-131	5.22966e-130
CDH1_SV	0.0905906	0.0377129	0.135022	1.40749e-08	6.54483e-07	3.7309e-20	1.15658e-18	9.02437e-31	2.09817e-29
BRCA1_SV	0.0335335	0.06691	0.0253287	5.80141e-06	0.000134883	8.47947e-10	1.57718e-08	6.41074e-05	0.000372624
HNF1A_SV	0.0015015	0.0121655	0.00109564	5.08696e-06	0.000134883	3.79868e-07	5.88795e-06	0.395224	0.539907
ESR1_SV	0.0222723	0.0474453	0.190126	4.28404e-05	0.000796832	5.31499e-32	2.47147e-30	0	0
SMARCA4_SV	0.00458792	0.0145985	0.00702501	0.00102172	0.0158367	0.0206634	0.0686321	0.00911557	0.0273467
BARD1_SV	0.0035035	0.0121655	0.00277133	0.00150718	0.020024	0.000267392	0.00310843	0.324194	0.456819
NF1_SV	0.038622	0.0608273	0.0493039	0.0030832	0.0286738	0.138926	0.264333	1.93973e-05	0.00013867
TSC2_SV	0.00392059	0.0121655	0.00502707	0.00307967	0.0286738	0.0128008	0.0476188	0.205502	0.329512
ACVR1B_SV	0.00316984	0.0109489	0.00277133	0.00264537	0.0286738	0.00103552	0.0107004	0.575624	0.695234
AKT1_SV	0.0372039	0.0182482	0.0435679	0.0034703	0.0293398	0.000165703	0.00220148	0.00820067	0.0272379
BCORL1_SV	0.00433767	0.0121655	0.00438257	0.00574609	0.0445322	0.00557989	0.0336624	1	1
ARID1A_SV	0.0429596	0.0644769	0.0692189	0.00635742	0.04548	0.671592	0.800744	7.47747e-21	1.39081e-19
EP300_SV	0.00667334	0.0158151	0.00567156	0.0083066	0.0551795	0.00163276	0.0151847	0.310552	0.447756
TNFAIP3_SV	0.00133467	0.00608273	0.00122454	0.00923244	0.0572411	0.0060881	0.0336624	0.865159	0.946585
NOTCH3_SV	0.00717384	0.0158151	0.00683166	0.0118679	0.0620659	0.00895001	0.0396358	0.770328	0.863138
FANCC_SV	0.00342009	0.00973236	0.00341583	0.0120128	0.0620659	0.0110168	0.0426901	1	1
RBM10_SV	0.00141808	0.00608273	0.00296468	0.0113297	0.0620659	0.112272	0.261033	0.00745802	0.0270793
PIK3CA_SV	0.306473	0.265207	0.380897	0.013477	0.0640954	1.08845e-11	2.53065e-10	6.49257e-38	2.0127e-36
SOX9_SV	0.00358692	0.00973236	0.00464037	0.0151623	0.0640954	0.0635092	0.151445	0.188133	0.312435
ERBB4_SV	0.00216884	0.00729927	0.00354473	0.0147771	0.0640954	0.128009	0.264333	0.042888	0.0972825
TERT_SV	0.0147648	0.00486618	0.0105697	0.014055	0.0640954	0.151964	0.271782	0.00205585	0.00910446
MLH1_SV	0.003003	0.00851582	0.00232019	0.0185745	0.0751055	0.00525431	0.0336624	0.285693	0.421737
JAK1_SV	0.00166834	0.00608273	0.000966744	0.0195028	0.0755733	0.00262341	0.0221798	0.124789	0.222124
BRCA2_SV	0.0357858	0.0510949	0.0420856	0.0275135	0.10235	0.213886	0.352735	0.00783549	0.0270793
KMT2D_SV	0.0185185	0.0291971	0.0159191	0.035538	0.127117	0.00708739	0.0366182	0.100393	0.194511
MSH6_SV	0.00492159	0.0109489	0.00534932	0.0398814	0.131747	0.0502115	0.129713	0.671694	0.785235
ATR_SV	0.00500501	0.0109489	0.00734725	0.041709	0.131747	0.216192	0.352735	0.0172027	0.0432392
SF3B1_SV	0.0165999	0.00729927	0.0191415	0.042499	0.131747	0.0109606	0.0426901	0.120392	0.219538
NRAS_SV	0.00208542	0.00608273	0.00212684	0.0402367	0.131747	0.0404423	0.113974	1	1
KRAS_SV	0.014014	0.0231144	0.0257154	0.0483914	0.138688	0.734054	0.853338	5.68096e-12	7.54757e-11
ASXL1_SV	0.00675676	0.013382	0.0087007	0.0492119	0.138688	0.178235	0.301379	0.0733967	0.145232
ATRX_SV	0.00675676	0.013382	0.00650941	0.0492119	0.138688	0.028408	0.0880647	0.822208	0.910302
KEL_SV	0.00425425	0.00973236	0.00464037	0.0536048	0.146625	0.0635092	0.151445	0.649918	0.774902
PRKN_SV	0.00316984	0.00729927	0.00354473	0.0604293	0.160569	0.128009	0.264333	0.675471	0.785235
CBFB_SV	0.0119286	0.00486618	0.016048	0.0630889	0.16298	0.00819026	0.0380847	0.00472225	0.0190943
BRIP1_SV	0.00475475	0.00973236	0.00541377	0.0685045	0.172187	0.141967	0.264333	0.495998	0.62833
AMER1_SV	0.0025025	0.00608273	0.00354473	0.0707035	0.173037	0.228105	0.365755	0.126587	0.222124
BCOR_SV	0.00392059	0	0.00515597	0.0731303	0.174388	0.0347312	0.104193	0.151188	0.260379
BRD4_SV	0.00392059	0.00851582	0.00476927	0.0835721	0.194305	0.127837	0.264333	0.312948	0.447756
PTCH1_SV	0.004004	0.00851582	0.00567156	0.0865692	0.196364	0.33829	0.470483	0.056281	0.118958
NOTCH1_SV	0.0171004	0.0255474	0.0132122	0.0978551	0.21164	0.00806701	0.0380847	0.00902709	0.0273467
DNMT3A_SV	0.0179346	0.00973236	0.0240397	0.0962662	0.21164	0.00590569	0.0336624	0.000556341	0.00258698
FGFR2_SV	0.00592259	0.0109489	0.0105697	0.101672	0.214898	0.860767	0.909674	2.86651e-05	0.000177724
PMS2_SV	0.0035035	0.00729927	0.00348028	0.126201	0.260815	0.125108	0.264333	1	1
MSH2_SV	0.00367034	0.00729927	0.00309358	0.135138	0.273213	0.0530018	0.133221	0.461236	0.595764
PALB2_SV	0.0121788	0.0182482	0.0121165	0.142378	0.281727	0.142115	0.264333	1	1
TSC1_SV	0.00383717	0.00729927	0.00457592	0.145864	0.282612	0.285469	0.428204	0.400576	0.539907
PIK3R1_SV	0.0321989	0.0413625	0.023653	0.155878	0.29585	0.00347669	0.0269444	2.08751e-05	0.00013867
HRAS_SV	0.00658992	0.00243309	0.00476927	0.174814	0.325153	0.592642	0.740374	0.0495361	0.107136
VHL_SV	0.00316984	0.00608273	0.00367363	0.196726	0.358735	0.241297	0.37401	0.534473	0.662746
PRDM1_SV	0.00342009	0.00608273	0.00212684	0.217528	0.38904	0.0404423	0.113974	0.0457003	0.101194
ATM_SV	0.0222723	0.0291971	0.0270044	0.224284	0.393556	0.659683	0.796761	0.0125839	0.0344206
CIC_SV	0.00358692	0.00608273	0.00406032	0.233831	0.40271	0.393659	0.523318	0.557159	0.681786
STK11_SV	0.0103437	0.0145985	0.00928074	0.286895	0.47645	0.137146	0.264333	0.386473	0.536448
CDKN1B_SV	0.0106773	0.00608273	0.0142434	0.283125	0.47645	0.0463111	0.123055	0.00906538	0.0273467
CREBBP_SV	0.0151818	0.0194647	0.0103764	0.307208	0.484243	0.0225834	0.0724227	0.000439346	0.00215048
KDM6A_SV	0.0107608	0.0145985	0.00915184	0.297776	0.484243	0.133603	0.264333	0.196052	0.319874
KEAP1_SV	0.00283617	0.00486618	0.00451147	0.3052	0.484243	0.788332	0.894084	0.0288585	0.0670959
GNAS_SV	0.00308642	0.00486618	0.00322248	0.333416	0.516795	0.349097	0.477442	0.913895	0.988282
CDKN2A_SV	0.0134301	0.0170316	0.0145656	0.352477	0.537383	0.550183	0.700918	0.439113	0.575177
MEN1_SV	0.00675676	0.00364964	0.0125032	0.374152	0.561228	0.0200027	0.0686321	1.60938e-06	1.49672e-05
RB1_SV	0.0461295	0.0389294	0.0430523	0.387514	0.563107	0.658209	0.796761	0.226173	0.344821
CBL_SV	0.00392059	0.00608273	0.00360918	0.384261	0.563107	0.234572	0.369749	0.691339	0.793759
CHEK2_SV	0.0181849	0.013382	0.0264243	0.412434	0.590097	0.0174138	0.0622877	4.92339e-06	4.16251e-05
SPEN_SV	0.0201869	0.0243309	0.0230085	0.442945	0.614834	0.810997	0.896511	0.113596	0.212893
EGFR_SV	0.00517184	0.00243309	0.00592936	0.439015	0.614834	0.33603	0.470483	0.416367	0.553173
MAP3K1_SV	0.0437938	0.0377129	0.0601315	0.478509	0.654431	0.00615333	0.0336624	1.59733e-09	1.8569e-08
FANCA_SV	0.00650651	0.00851582	0.00650941	0.500185	0.674162	0.502003	0.651447	1	1
SETD2_SV	0.00692359	0.00851582	0.00979634	0.518588	0.688981	0.856066	0.909674	0.00999541	0.0290492
PTEN_SV	0.0760761	0.0693431	0.0667698	0.539247	0.706337	0.774321	0.889035	0.00304305	0.0128638
BAP1_SV	0.00809142	0.00973236	0.00560712	0.548679	0.70871	0.149612	0.271782	0.0136957	0.0361034
ERBB2_SV	0.0286119	0.0316302	0.0393143	0.589815	0.729925	0.308315	0.455132	1.37332e-06	1.41909e-05
MAP2K4_SV	0.0191024	0.0158151	0.0273911	0.596498	0.729925	0.045411	0.123055	7.46642e-06	5.78647e-05
TET2_SV	0.01001	0.00729927	0.0133411	0.583038	0.729925	0.15573	0.273262	0.0115636	0.0325883
CTCF_SV	0.00467134	0.00608273	0.00580046	0.594302	0.729925	0.813636	0.896511	0.210272	0.331445
CDK12_SV	0.00500501	0.00608273	0.00470482	0.609418	0.736051	0.597076	0.740374	0.726707	0.824192
CTNNA1_SV	0.00850851	0.00973236	0.00618716	0.693852	0.806603	0.252489	0.384942	0.025711	0.0629242
FBXW7_SV	0.00834168	0.00608273	0.00683166	0.687249	0.806603	1	1	0.158548	0.26809
ERBB3_SV	0.0106773	0.00851582	0.0131477	0.723213	0.830356	0.33895	0.470483	0.0661349	0.133707
GATA3_SV	0.0819987	0.0851582	0.113882	0.742729	0.842364	0.0106724	0.0426901	1.45808e-18	2.26002e-17
TBX3_SV	0.0321154	0.0291971	0.0407321	0.75799	0.849314	0.120154	0.264333	0.000183088	0.000945955
PBRM1_SV	0.00417084	0.00486618	0.00612271	0.776998	0.860248	0.819392	0.896511	0.0288401	0.0670959
STAG2_SV	0.00533867	0.00608273	0.0077984	0.802796	0.878353	0.836422	0.904502	0.0139755	0.0361034
APC_SV	0.0105105	0.0109489	0.0120521	0.859381	0.918648	1	1	0.251609	0.377413
SMAD4_SV	0.00975976	0.00851582	0.0148879	0.854998	0.918648	0.176234	0.301379	0.000166481	0.000910748
MUTYH_SV	0.016016	0.0145985	0.0185615	0.885513	0.935826	0.504346	0.651447	0.114458	0.212893
NOTCH2_SV	0.0148482	0.0145985	0.0111498	1	1	0.393895	0.523318	0.00786174	0.0270793
BRAF_SV	0.00592259	0.00486618	0.0088296	1	1	0.329581	0.470483	0.00609388	0.0236138
CASP8_SV	0.00558892	0.00486618	0.00573601	1	1	1	1	0.935509	1

## Sheet: DetailPrev CN>0.5%
CN Prevalence >0.5%: Genes with prevalence more than 0.5% in any cohort
Gene	# local	# var local	% var local	# brain met	# var brain met	% var brain met	# other met	# var other met	% var other met	OR brain met vs local	pval brain met vs local	OR brain met vs other met	pval brain met vs other met	OR other met vs local	pval other met vs local
MYC_CN	11988	2515	0.209793	822	213	0.259124	15516	2651	0.170856	1.31738	0.0011034	1.69731	7.52168e-10	0.776157	3.26866e-16
ERBB2_CN	11988	1101	0.0918418	822	185	0.225061	15516	1194	0.0769528	2.87179	1.14148e-27	3.48363	3.57082e-37	0.824369	1.08487e-05
CCND1_CN	11988	1814	0.151318	822	108	0.131387	15516	3412	0.219902	0.84836	0.1298	0.536594	2.9853e-10	1.58101	1.36762e-47
FGF4_CN	11988	1598	0.1333	822	102	0.124088	15516	3094	0.199407	0.921099	0.489626	0.568773	3.25272e-08	1.61945	3.49862e-48
ZNF703_CN	11988	1472	0.122789	822	101	0.122871	15516	2640	0.170147	1.00076	1	0.683224	0.000318759	1.46476	3.8519e-28
FGF19_CN	11988	1676	0.139806	822	100	0.121655	15516	3247	0.209268	0.852181	0.158778	0.523347	1.83411e-10	1.62833	4.80603e-51
FGF3_CN	11988	1622	0.135302	822	100	0.121655	15516	3131	0.201792	0.885163	0.290403	0.547868	4.38102e-09	1.61565	3.20756e-48
FGFR1_CN	11988	1407	0.117367	822	84	0.10219	15516	2369	0.152681	0.855964	0.196367	0.631662	4.70789e-05	1.3551	2.40398e-17
PTEN_CN	11988	639	0.0533033	822	77	0.093674	15516	734	0.047306	1.83566	6.39821e-06	2.08148	5.97463e-08	0.881901	0.0237542
CDKN2A_CN	11988	640	0.0533867	822	69	0.0839416	15516	833	0.0536865	1.62478	0.000485992	1.61519	0.000524522	1.00593	0.935432
MCL1_CN	11988	834	0.0695696	822	66	0.080292	15516	691	0.0445347	1.16758	0.258526	1.873	1.1797e-05	0.623373	4.07308e-19
ZNF217_CN	11988	693	0.0578078	822	63	0.0766423	15516	1066	0.0687033	1.35286	0.0318243	1.12515	0.396658	1.20238	0.000257427
CDKN2B_CN	11988	577	0.0481315	822	61	0.0742092	15516	754	0.048595	1.58523	0.00157132	1.56935	0.00173005	1.01012	0.865059
GNAS_CN	11988	611	0.0509676	822	61	0.0742092	15516	920	0.0592936	1.49256	0.0057908	1.27172	0.0829735	1.17366	0.00296618
CCNE1_CN	11988	575	0.0479646	822	54	0.0656934	15516	449	0.0289379	1.39561	0.0295379	2.35946	1.30432e-07	0.591496	2.43197e-16
AURKA_CN	11988	465	0.0387888	822	44	0.053528	15516	759	0.0489172	1.40148	0.0418716	1.09959	0.56171	1.27455	5.27874e-05
PIK3CA_CN	11988	259	0.0216049	822	43	0.0523114	15516	342	0.0220418	2.49972	1.0306e-06	2.44909	1.24673e-06	1.02067	0.835303
ARFRP1_CN	11988	362	0.0301969	822	41	0.0498783	15516	622	0.0400877	1.68599	0.00356344	1.25705	0.172839	1.34122	1.12204e-05
LYN_CN	11988	518	0.0432099	822	41	0.0498783	15516	623	0.0401521	1.16243	0.376707	1.25495	0.17331	0.926274	0.211317
EMSY_CN	11988	685	0.0571405	822	38	0.0462287	15516	1300	0.0837845	0.79978	0.211062	0.530031	4.9134e-05	1.50893	1.48858e-17
RB1_CN	11988	326	0.0271939	822	38	0.0462287	15516	316	0.0203661	1.7339	0.00312772	2.33144	1.08378e-05	0.743702	0.00024237
CCND3_CN	11988	232	0.0193527	822	37	0.0450122	15516	184	0.0118587	2.38838	1.16328e-05	3.92747	9.86743e-11	0.608122	5.6298e-07
PRKCI_CN	11988	181	0.0150984	822	36	0.0437956	15516	200	0.0128899	2.98773	1.23795e-07	3.50748	2.46068e-09	0.851816	0.1313
VEGFA_CN	11988	219	0.0182683	822	36	0.0437956	15516	181	0.0116654	2.46136	7.09445e-06	3.88048	2.30463e-10	0.634293	7.25547e-06
PIK3C2B_CN	11988	496	0.0413747	822	35	0.0425791	15516	663	0.0427301	1.0304	0.856318	0.996309	1	1.03422	0.586057
TERC_CN	11988	224	0.0186854	822	35	0.0425791	15516	245	0.0157902	2.33561	2.7629e-05	2.77201	6.41193e-07	0.842569	0.0671254
MAP2K4_CN	11988	234	0.0195195	822	33	0.040146	15516	437	0.0281645	2.10091	0.000322445	1.44321	0.0530623	1.45572	3.80185e-06
AKT2_CN	11988	226	0.0188522	822	32	0.0389294	15516	202	0.0130188	2.10812	0.000421965	3.07086	2.56093e-07	0.686492	0.000122946
MDM2_CN	11988	450	0.0375375	822	32	0.0389294	15516	769	0.0495617	1.03858	0.84947	0.776784	0.184723	1.33703	1.42457e-06
MDM4_CN	11988	410	0.0342009	822	32	0.0389294	15516	649	0.0418278	1.14386	0.488377	0.927901	0.787948	1.23274	0.00112753
JAK2_CN	11988	207	0.0172673	822	31	0.0377129	15516	188	0.0121165	2.23047	0.000148115	3.19531	1.80413e-07	0.698046	0.000412206
AKT3_CN	11988	336	0.028028	822	30	0.0364964	15516	480	0.0309358	1.31358	0.159082	1.18655	0.354292	1.10706	0.162348
EGFR_CN	11988	278	0.0231899	822	29	0.0352798	15516	242	0.0155968	1.54041	0.0334865	2.30814	0.000117929	0.667382	6.10492e-06
KDM5A_CN	11988	462	0.0385385	822	29	0.0352798	15516	325	0.0209461	0.91235	0.70744	1.70934	0.00940052	0.533745	6.14943e-18
NTRK1_CN	11988	227	0.0189356	822	29	0.0352798	15516	225	0.0145012	1.89471	0.0027399	2.4853	3.46908e-05	0.762369	0.00472862
PARP1_CN	11988	270	0.0225225	822	28	0.0340633	15516	408	0.0262954	1.53048	0.0411244	1.30582	0.181651	1.17204	0.0455906
CD274_CN	11988	188	0.0156823	822	28	0.0340633	15516	173	0.0111498	2.21341	0.00036061	3.12753	9.78495e-07	0.707718	0.00131725
PDCD1LG2_CN	11988	183	0.0152653	822	28	0.0340633	15516	166	0.0106986	2.27485	0.000288599	3.2609	4.70773e-07	0.697613	0.00090056
SOX2_CN	11988	115	0.00959293	822	28	0.0340633	15516	179	0.0115365	3.64083	9.23102e-08	3.02152	1.77555e-06	1.20497	0.124447
IGF1R_CN	11988	258	0.0215215	822	26	0.0316302	15516	403	0.0259732	1.48504	0.0651705	1.22491	0.313185	1.21236	0.0171966
IRS2_CN	11988	170	0.0141808	822	23	0.0279805	15516	182	0.0117298	2.00113	0.00425288	2.4253	0.000293146	0.825108	0.0744162
KRAS_CN	11988	322	0.0268602	822	23	0.0279805	15516	267	0.017208	1.04291	0.823541	1.64404	0.0292388	0.63436	5.38702e-08
CCND2_CN	11988	310	0.0258592	822	22	0.026764	15516	206	0.0132766	1.03595	0.82073	2.04381	0.00327328	0.506873	4.31625e-14
IKBKE_CN	11988	265	0.0221054	822	21	0.0255474	15516	500	0.0322248	1.15979	0.540411	0.787356	0.35808	1.47302	3.80375e-07
RICTOR_CN	11988	154	0.0128462	822	21	0.0255474	15516	203	0.0130833	2.01464	0.00483149	1.97766	0.00532175	1.0187	0.872156
FAS_CN	11988	123	0.0102603	822	21	0.0255474	15516	138	0.00889404	2.529	0.000403727	2.92151	4.86492e-05	0.865649	0.259109
FGF23_CN	11988	294	0.0245245	822	20	0.0243309	15516	202	0.0130188	0.991908	1	1.89057	0.0120707	0.524661	1.8324e-12
FGF6_CN	11988	296	0.0246914	822	20	0.0243309	15516	201	0.0129544	0.985037	1	1.9001	0.0118151	0.518413	6.96328e-13
KIT_CN	11988	130	0.0108442	822	20	0.0243309	15516	103	0.00663831	2.2747	0.00196533	3.73169	3.1883e-06	0.609562	0.000191757
CDK6_CN	11988	148	0.0123457	822	19	0.0231144	15516	165	0.0106342	1.8929	0.0155186	2.20136	0.00313262	0.859879	0.187741
FGF12_CN	11988	114	0.00950951	822	19	0.0231144	15516	188	0.0121165	2.46451	0.000961301	1.92915	0.0100121	1.27751	0.0411315
KDR_CN	11988	116	0.00967634	822	19	0.0231144	15516	94	0.00605826	2.42161	0.00110926	3.88196	3.35596e-06	0.623811	0.000764796
CUL4A_CN	11988	151	0.0125959	822	18	0.0218978	15516	147	0.00947409	1.75502	0.037481	2.34069	0.00184604	0.749784	0.0136361
PDGFRA_CN	11988	102	0.00850851	822	17	0.0206813	15516	91	0.00586491	2.46087	0.00187113	3.57962	2.65973e-05	0.687467	0.0106359
CDK4_CN	11988	231	0.0192693	822	16	0.0194647	15516	274	0.0176592	1.01034	0.895983	1.10427	0.683327	0.914941	0.341593
ESR1_CN	11988	180	0.015015	822	16	0.0194647	15516	311	0.0200438	1.30223	0.302837	0.970534	1	1.34177	0.00177612
PIK3CB_CN	11988	68	0.00567234	822	16	0.0194647	15516	71	0.00457592	3.47978	7.3959e-05	4.31832	6.01537e-06	0.80582	0.229862
RPTOR_CN	11988	167	0.0139306	822	16	0.0194647	15516	181	0.0116654	1.40515	0.22088	1.68186	0.0678443	0.835473	0.102616
FGF10_CN	11988	84	0.00700701	822	15	0.0182482	15516	141	0.00908739	2.63409	0.00154531	2.02681	0.015017	1.29962	0.0589205
FGFR2_CN	11988	230	0.0191859	822	15	0.0182482	15516	212	0.0136633	0.950218	1	1.3418	0.281512	0.708168	0.000338641
ROS1_CN	11988	92	0.00767434	822	15	0.0182482	15516	97	0.00625161	2.40343	0.00416596	2.95462	0.000484699	0.813446	0.162388
BCL2L1_CN	11988	153	0.0127628	822	13	0.0158151	15516	165	0.0106342	1.243	0.424713	1.49502	0.165433	0.831427	0.11115
HGF_CN	11988	188	0.0156823	822	13	0.0158151	15516	183	0.0117943	1.0086	0.885235	1.34639	0.32014	0.749114	0.00608096
NFKBIA_CN	11988	165	0.0137638	822	13	0.0158151	15516	299	0.0192704	1.15143	0.642264	0.817811	0.59993	1.40795	0.000464398
SRC_CN	11988	104	0.00867534	822	13	0.0158151	15516	192	0.0123743	1.83622	0.0539988	1.28252	0.418147	1.43172	0.0031779
MYCN_CN	11988	67	0.00558892	822	12	0.0145985	15516	78	0.00502707	2.63593	0.0043144	2.93219	0.0017943	0.898962	0.556974
NF1_CN	11988	133	0.0110944	822	12	0.0145985	15516	179	0.0115365	1.32052	0.390513	1.26936	0.403328	1.04031	0.774123
BCL2L2_CN	11988	132	0.011011	822	11	0.013382	15516	126	0.00812065	1.21825	0.491784	1.65668	0.113493	0.735354	0.0163735
JUN_CN	11988	89	0.00742409	822	11	0.013382	15516	78	0.00502707	1.81339	0.0654679	2.68453	0.0049632	0.675498	0.0121679
RAF1_CN	11988	90	0.00750751	822	11	0.013382	15516	126	0.00812065	1.79309	0.0971682	1.65668	0.113493	1.08234	0.582303
FGFR4_CN	11988	45	0.00375375	822	10	0.0121655	15516	101	0.00650941	3.26847	0.0023418	1.8796	0.0749238	1.73892	0.00187486
MYCL_CN	11988	108	0.00900901	822	10	0.0121655	15516	116	0.00747615	1.35468	0.342999	1.63496	0.146884	0.828571	0.175971
RAD51B_CN	11988	35	0.00291959	822	10	0.0121655	15516	36	0.00232019	4.20584	0.000456653	5.29557	7.68829e-05	0.794219	0.340014
BRAF_CN	11988	56	0.00467134	822	9	0.0109489	15516	79	0.00509152	2.35872	0.0355588	2.16316	0.043143	1.09041	0.663945
CTNNA1_CN	11988	89	0.00742409	822	9	0.0109489	15516	68	0.00438257	1.48004	0.294705	2.51487	0.0149326	0.588514	0.00117661
FGF14_CN	11988	60	0.00500501	822	9	0.0109489	15516	77	0.00496262	2.20074	0.041709	2.21963	0.0403263	0.991489	1
TP53_CN	11988	89	0.00742409	822	9	0.0109489	15516	157	0.0101186	1.48004	0.294705	1.08297	0.722134	1.36665	0.019947
AR_CN	11988	55	0.00458792	822	8	0.00973236	15516	75	0.00483372	2.13232	0.062485	2.02339	0.0705602	1.05384	0.790912
GID4_CN	11988	56	0.00467134	822	8	0.00973236	15516	58	0.00373808	2.09407	0.0653646	2.61933	0.0172757	0.799466	0.256187
EPHB4_CN	11988	89	0.00742409	822	8	0.00973236	15516	87	0.00560712	1.31397	0.406154	1.74295	0.149612	0.753879	0.0670885
ERBB4_CN	11988	39	0.00325325	822	8	0.00973236	15516	60	0.00386698	3.01115	0.00937252	2.5317	0.0203815	1.18938	0.418318
NKX2-1_CN	11988	98	0.00817484	822	8	0.00973236	15516	225	0.0145012	1.1924	0.552141	0.667912	0.362209	1.78526	1.06127e-06
STK11_CN	11988	78	0.00650651	822	8	0.00973236	15516	72	0.00464037	1.50066	0.265527	2.10811	0.0635092	0.711852	0.0391066
AKT1_CN	11988	100	0.00834168	822	7	0.00851582	15516	106	0.00683166	1.02106	0.843935	1.24864	0.515196	0.817734	0.158548
ARAF_CN	11988	54	0.0045045	822	7	0.00851582	15516	43	0.00277133	1.89816	0.111811	3.09063	0.0120335	0.614167	0.0181328
EPHB1_CN	11988	34	0.00283617	822	7	0.00851582	15516	48	0.00309358	3.01978	0.0144709	2.76779	0.0197204	1.09104	0.738817
KEL_CN	11988	41	0.00342009	822	7	0.00851582	15516	67	0.00431812	2.50274	0.0322511	1.98046	0.0998665	1.26372	0.24511
MET_CN	11988	41	0.00342009	822	7	0.00851582	15516	71	0.00457592	2.50274	0.0322511	1.8684	0.114696	1.33951	0.152084
RET_CN	11988	88	0.00734067	822	7	0.00851582	15516	95	0.00612271	1.16146	0.672009	1.39421	0.360509	0.833058	0.231634
SMAD4_CN	11988	37	0.00308642	822	7	0.00851582	15516	100	0.00644496	2.77423	0.0209052	1.32407	0.499892	2.09523	8.80663e-05
BAP1_CN	11988	37	0.00308642	822	6	0.00729927	15516	36	0.00232019	2.375	0.0550396	3.16176	0.017779	0.751163	0.238117
MAP3K1_CN	11988	47	0.00392059	822	6	0.00729927	15516	31	0.00199794	1.86812	0.151859	3.67291	0.00973345	0.50862	0.00397039
NOTCH3_CN	11988	145	0.0120954	822	6	0.00729927	15516	154	0.00992524	0.600558	0.312653	0.73348	0.585543	0.818779	0.089118
PIK3R1_CN	11988	24	0.002002	822	6	0.00729927	15516	20	0.00128899	3.66544	0.010794	5.69706	0.00154135	0.643392	0.170638
BRCA1_CN	11988	48	0.004004	822	5	0.00608273	15516	40	0.00257798	1.52234	0.389212	2.36781	0.0741962	0.642931	0.040854
CREBBP_CN	11988	63	0.00525526	822	5	0.00608273	15516	36	0.00232019	1.15842	0.623623	2.63158	0.0534674	0.440199	6.45133e-05
CRKL_CN	11988	35	0.00291959	822	5	0.00608273	15516	78	0.00502707	2.09005	0.181035	1.21128	0.611639	1.72549	0.0075269
FGFR3_CN	11988	20	0.00166834	822	5	0.00608273	15516	43	0.00277133	3.66218	0.0195028	2.20219	0.0922195	1.66297	0.074119
FLT3_CN	11988	54	0.0045045	822	5	0.00608273	15516	83	0.00534932	1.35251	0.428112	1.13794	0.804022	1.18856	0.342915
MAP2K1_CN	11988	22	0.00183517	822	5	0.00608273	15516	41	0.00264243	3.3287	0.0266724	2.30991	0.0799722	1.44105	0.203095
REL_CN	11988	78	0.00650651	822	5	0.00608273	15516	55	0.00354473	0.934469	1	1.72037	0.228105	0.543178	0.000580311
ERBB3_CN	11988	60	0.00500501	822	4	0.00486618	15516	52	0.00335138	0.972127	1	1.4542	0.366	0.668495	0.0356168
CDK8_CN	11988	49	0.00408742	822	3	0.00364964	15516	89	0.00573601	0.892502	1	0.634934	0.630792	1.40566	0.0583644
EPHA3_CN	11988	120	0.01001	822	3	0.00364964	15516	134	0.00863625	0.362271	0.0918872	0.42048	0.165962	0.861565	0.252629

## Sheet: FDR Detail Prev CN
CN Prevalence >0.5%: Genes with prevalence more than 0.5% in any cohort and Benjamini-Hochberg p-value
Gene	% var local	% var brain met	% var other met	pval brain met vs BC	Benjamini-Hochberg P-value BM vs BC	pval brain met vs other met	Benjamini-Hochberg P-value BM vs Other Met	pval other met vs BC	Benjamini-Hochberg P-value Other Met vs BC
MYC_CN	0.209793	0.259124	0.170856	0.0011034	0.00582362	7.52168e-10	1.31629e-08	3.26866e-16	3.12009e-15
ERBB2_CN	0.0918418	0.225061	0.0769528	1.14148e-27	1.19855e-25	3.57082e-37	3.74936e-35	1.08487e-05	4.90893e-05
CCND1_CN	0.151318	0.131387	0.219902	0.1298	0.22715	2.9853e-10	6.26912e-09	1.36762e-47	3.58999e-46
FGF4_CN	0.1333	0.124088	0.199407	0.489626	0.61473	3.25272e-08	3.79483e-07	3.49862e-48	1.22452e-46
ZNF703_CN	0.122789	0.122871	0.170147	1	1	0.000318759	0.00104593	3.8519e-28	8.08898e-27
FGF19_CN	0.139806	0.121655	0.209268	0.158778	0.265137	1.83411e-10	6.04966e-09	4.80603e-51	5.04633e-49
FGF3_CN	0.135302	0.121655	0.201792	0.290403	0.429779	4.38102e-09	5.75009e-08	3.20756e-48	1.22452e-46
FGFR1_CN	0.117367	0.10219	0.152681	0.196367	0.317208	4.70789e-05	0.000184253	2.40398e-17	2.80464e-16
PTEN_CN	0.0533033	0.093674	0.047306	6.39821e-06	0.000124153	5.97463e-08	6.27336e-07	0.0237542	0.0445392
CDKN2A_CN	0.0533867	0.0839416	0.0536865	0.000485992	0.00300172	0.000524522	0.00161985	0.935432	0.944426
MCL1_CN	0.0695696	0.080292	0.0445347	0.258526	0.399195	1.1797e-05	5.38557e-05	4.07308e-19	7.1279e-18
ZNF217_CN	0.0578078	0.0766423	0.0687033	0.0318243	0.0769629	0.396658	0.467968	0.000257427	0.000871931
CDKN2B_CN	0.0481315	0.0742092	0.048595	0.00157132	0.00749949	0.00173005	0.00504599	0.865059	0.889091
GNAS_CN	0.0509676	0.0742092	0.0592936	0.0057908	0.0184253	0.0829735	0.132003	0.00296618	0.007243
CCNE1_CN	0.0479646	0.0656934	0.0289379	0.0295379	0.0756457	1.30432e-07	1.24503e-06	2.43197e-16	2.55357e-15
AURKA_CN	0.0387888	0.053528	0.0489172	0.0418716	0.0879303	0.56171	0.627442	5.27874e-05	0.000221707
PIK3CA_CN	0.0216049	0.0523114	0.0220418	1.0306e-06	2.70533e-05	1.24673e-06	7.70041e-06	0.835303	0.868385
ARFRP1_CN	0.0301969	0.0498783	0.0400877	0.00356344	0.0133629	0.172839	0.236331	1.12204e-05	4.90893e-05
LYN_CN	0.0432099	0.0498783	0.0401521	0.376707	0.52045	0.17331	0.236331	0.211317	0.273929
RB1_CN	0.0271939	0.0462287	0.0203661	0.00312772	0.0121634	1.08378e-05	5.17257e-05	0.00024237	0.000848295
EMSY_CN	0.0571405	0.0462287	0.0837845	0.211062	0.335781	4.9134e-05	0.000184253	1.48858e-17	1.95376e-16
CCND3_CN	0.0193527	0.0450122	0.0118587	1.16328e-05	0.000174492	9.86743e-11	5.1804e-09	5.6298e-07	3.47723e-06
PRKCI_CN	0.0150984	0.0437956	0.0128899	1.23795e-07	4.33284e-06	2.46068e-09	3.69102e-08	0.1313	0.191479
VEGFA_CN	0.0182683	0.0437956	0.0116654	7.09445e-06	0.000124153	2.30463e-10	6.04966e-09	7.25547e-06	3.46284e-05
TERC_CN	0.0186854	0.0425791	0.0157902	2.7629e-05	0.000362631	6.41193e-07	4.48835e-06	0.0671254	0.108433
PIK3C2B_CN	0.0413747	0.0425791	0.0427301	0.856318	0.936598	1	1	0.586057	0.647747
MAP2K4_CN	0.0195195	0.040146	0.0281645	0.000322445	0.00282139	0.0530623	0.0951538	3.80185e-06	1.99597e-05
AKT2_CN	0.0188522	0.0389294	0.0130188	0.000421965	0.00295375	2.56093e-07	2.06845e-06	0.000122946	0.000461046
MDM4_CN	0.0342009	0.0389294	0.0418278	0.488377	0.61473	0.787948	0.811123	0.00112753	0.00311554
MDM2_CN	0.0375375	0.0389294	0.0495617	0.84947	0.936598	0.184723	0.245518	1.42457e-06	7.87261e-06
JAK2_CN	0.0172673	0.0377129	0.0121165	0.000148115	0.0015552	1.80413e-07	1.57861e-06	0.000412206	0.00131157
AKT3_CN	0.028028	0.0364964	0.0309358	0.159082	0.265137	0.354292	0.436704	0.162348	0.224352
NTRK1_CN	0.0189356	0.0352798	0.0145012	0.0027399	0.011065	3.46908e-05	0.000145701	0.00472862	0.0107936
EGFR_CN	0.0231899	0.0352798	0.0155968	0.0334865	0.0781351	0.000117929	0.000412753	6.10492e-06	3.05246e-05
KDM5A_CN	0.0385385	0.0352798	0.0209461	0.70744	0.825346	0.00940052	0.0229548	6.14943e-18	9.22414e-17
SOX2_CN	0.00959293	0.0340633	0.0115365	9.23102e-08	4.33284e-06	1.77555e-06	1.03574e-05	0.124447	0.184041
PDCD1LG2_CN	0.0152653	0.0340633	0.0106986	0.000288599	0.0027548	4.70773e-07	3.5308e-06	0.00090056	0.00255564
CD274_CN	0.0156823	0.0340633	0.0111498	0.00036061	0.00291262	9.78495e-07	6.42137e-06	0.00131725	0.00345779
PARP1_CN	0.0225225	0.0340633	0.0262954	0.0411244	0.0879303	0.181651	0.24453	0.0455906	0.0784757
IGF1R_CN	0.0215215	0.0316302	0.0259732	0.0651705	0.122752	0.313185	0.40103	0.0171966	0.0340687
IRS2_CN	0.0141808	0.0279805	0.0117298	0.00425288	0.0146133	0.000293146	0.000992914	0.0744162	0.116622
KRAS_CN	0.0268602	0.0279805	0.017208	0.823541	0.929805	0.0292388	0.0558196	5.38702e-08	3.77091e-07
CCND2_CN	0.0258592	0.026764	0.0132766	0.82073	0.929805	0.00327328	0.00859235	4.31625e-14	3.77672e-13
FAS_CN	0.0102603	0.0255474	0.00889404	0.000403727	0.00295375	4.86492e-05	0.000184253	0.259109	0.309164
RICTOR_CN	0.0128462	0.0255474	0.0130833	0.00483149	0.0158533	0.00532175	0.0133044	0.872156	0.889091
IKBKE_CN	0.0221054	0.0255474	0.0322248	0.540411	0.667566	0.35808	0.436704	3.80375e-07	2.49621e-06
KIT_CN	0.0108442	0.0243309	0.00663831	0.00196533	0.00859831	3.1883e-06	1.76188e-05	0.000191757	0.000694292
FGF6_CN	0.0246914	0.0243309	0.0129544	1	1	0.0118151	0.0264047	6.96328e-13	5.62419e-12
FGF23_CN	0.0245245	0.0243309	0.0130188	1	1	0.0120707	0.0264047	1.8324e-12	1.3743e-11
FGF12_CN	0.00950951	0.0231144	0.0121165	0.000961301	0.00560759	0.0100121	0.0233616	0.0411315	0.0719801
KDR_CN	0.00967634	0.0231144	0.00605826	0.00110926	0.00582362	3.35596e-06	1.76188e-05	0.000764796	0.00223066
CDK6_CN	0.0123457	0.0231144	0.0106342	0.0155186	0.0440392	0.00313262	0.00843398	0.187741	0.249529
CUL4A_CN	0.0125959	0.0218978	0.00947409	0.037481	0.0837342	0.00184604	0.0051009	0.0136361	0.0280743
PDGFRA_CN	0.00850851	0.0206813	0.00586491	0.00187113	0.00854214	2.65973e-05	0.000116363	0.0106359	0.0227912
PIK3CB_CN	0.00567234	0.0194647	0.00457592	7.3959e-05	0.000862855	6.01537e-06	3.00769e-05	0.229862	0.293031
RPTOR_CN	0.0139306	0.0194647	0.0116654	0.22088	0.346155	0.0678443	0.116781	0.102616	0.156155
ESR1_CN	0.015015	0.0194647	0.0200438	0.302837	0.435587	1	1	0.00177612	0.0045486
CDK4_CN	0.0192693	0.0194647	0.0176592	0.895983	0.959982	0.683327	0.724741	0.341593	0.395671
FGF10_CN	0.00700701	0.0182482	0.00908739	0.00154531	0.00749949	0.015017	0.0315357	0.0589205	0.0982009
ROS1_CN	0.00767434	0.0182482	0.00625161	0.00416596	0.0146133	0.000484699	0.00154222	0.162388	0.224352
FGFR2_CN	0.0191859	0.0182482	0.0136633	1	1	0.281512	0.364923	0.000338641	0.00111117
SRC_CN	0.00867534	0.0158151	0.0123743	0.0539988	0.111138	0.418147	0.482477	0.0031779	0.00758363
BCL2L1_CN	0.0127628	0.0158151	0.0106342	0.424713	0.55496	0.165433	0.232347	0.11115	0.166725
NFKBIA_CN	0.0137638	0.0158151	0.0192704	0.642264	0.766338	0.59993	0.656173	0.000464398	0.00143417
HGF_CN	0.0156823	0.0158151	0.0117943	0.885235	0.958244	0.32014	0.404996	0.00608096	0.0135851
MYCN_CN	0.00558892	0.0145985	0.00502707	0.0043144	0.0146133	0.0017943	0.00509195	0.556974	0.628841
NF1_CN	0.0110944	0.0145985	0.0115365	0.390513	0.52569	0.403328	0.470549	0.774123	0.821039
JUN_CN	0.00742409	0.013382	0.00502707	0.0654679	0.122752	0.0049632	0.0127106	0.0121679	0.0255527
RAF1_CN	0.00750751	0.013382	0.00812065	0.0971682	0.175908	0.113493	0.169622	0.582303	0.647747
BCL2L2_CN	0.011011	0.013382	0.00812065	0.491784	0.61473	0.113493	0.169622	0.0163735	0.0330618
RAD51B_CN	0.00291959	0.0121655	0.00232019	0.000456653	0.00299678	7.68829e-05	0.000278369	0.340014	0.395671
FGFR4_CN	0.00375375	0.0121655	0.00650941	0.0023418	0.00983554	0.0749238	0.122922	0.00187486	0.00468716
MYCL_CN	0.00900901	0.0121655	0.00747615	0.342999	0.480199	0.146884	0.214206	0.175971	0.236884
BRAF_CN	0.00467134	0.0109489	0.00509152	0.0355588	0.0811667	0.043143	0.0794739	0.663945	0.718704
FGF14_CN	0.00500501	0.0109489	0.00496262	0.041709	0.0879303	0.0403263	0.0756119	1	1
CTNNA1_CN	0.00742409	0.0109489	0.00438257	0.294705	0.429779	0.0149326	0.0315357	0.00117661	0.00316778
TP53_CN	0.00742409	0.0109489	0.0101186	0.294705	0.429779	0.722134	0.758241	0.019947	0.0380807
ERBB4_CN	0.00325325	0.00973236	0.00386698	0.00937252	0.0289445	0.0203815	0.0396307	0.418318	0.477428
GID4_CN	0.00467134	0.00973236	0.00373808	0.0653646	0.122752	0.0172757	0.0355676	0.256187	0.309164
AR_CN	0.00458792	0.00973236	0.00483372	0.062485	0.122752	0.0705602	0.119497	0.790912	0.830457
STK11_CN	0.00650651	0.00973236	0.00464037	0.265527	0.404063	0.0635092	0.111141	0.0391066	0.0707965
EPHB4_CN	0.00742409	0.00973236	0.00560712	0.406154	0.539825	0.149612	0.215195	0.0670885	0.108433
NKX2-1_CN	0.00817484	0.00973236	0.0145012	0.552141	0.674126	0.362209	0.436704	1.06127e-06	6.19073e-06
EPHB1_CN	0.00283617	0.00851582	0.00309358	0.0144709	0.0422068	0.0197204	0.0390687	0.738817	0.791589
SMAD4_CN	0.00308642	0.00851582	0.00644496	0.0209052	0.0562831	0.499892	0.570529	8.80663e-05	0.00034248
MET_CN	0.00342009	0.00851582	0.00457592	0.0322511	0.0769629	0.114696	0.169622	0.152084	0.218751
KEL_CN	0.00342009	0.00851582	0.00431812	0.0322511	0.0769629	0.0998665	0.154206	0.24511	0.302782
ARAF_CN	0.0045045	0.00851582	0.00277133	0.111811	0.198986	0.0120335	0.0264047	0.0181328	0.0352582
RET_CN	0.00734067	0.00851582	0.00612271	0.672009	0.79282	0.360509	0.436704	0.231634	0.293031
AKT1_CN	0.00834168	0.00851582	0.00683166	0.843935	0.936598	0.515196	0.581673	0.158548	0.224352
PIK3R1_CN	0.002002	0.00729927	0.00128899	0.010794	0.032382	0.00154135	0.00462406	0.170638	0.232688
BAP1_CN	0.00308642	0.00729927	0.00232019	0.0550396	0.111138	0.017779	0.0358998	0.238117	0.297647
MAP3K1_CN	0.00392059	0.00729927	0.00199794	0.151859	0.261397	0.00973345	0.0232276	0.00397039	0.00926423
NOTCH3_CN	0.0120954	0.00729927	0.00992524	0.312653	0.44363	0.585543	0.647179	0.089118	0.137609
FGFR3_CN	0.00166834	0.00608273	0.00277133	0.0195028	0.0538893	0.0922195	0.144523	0.074119	0.116622
MAP2K1_CN	0.00183517	0.00608273	0.00264243	0.0266724	0.0700149	0.0799722	0.129186	0.203095	0.266563
CRKL_CN	0.00291959	0.00608273	0.00502707	0.181035	0.297011	0.611639	0.662084	0.0075269	0.0164651
BRCA1_CN	0.004004	0.00608273	0.00257798	0.389212	0.52569	0.0741962	0.122922	0.040854	0.0719801
FLT3_CN	0.0045045	0.00608273	0.00534932	0.428112	0.55496	0.804022	0.819634	0.342915	0.395671
CREBBP_CN	0.00525526	0.00608273	0.00232019	0.623623	0.752649	0.0534674	0.0951538	6.45133e-05	0.000260535
REL_CN	0.00650651	0.00608273	0.00354473	1	1	0.228105	0.299388	0.000580311	0.00174093
ERBB3_CN	0.00500501	0.00486618	0.00335138	1	1	0.366	0.436704	0.0356168	0.0656099
EPHA3_CN	0.01001	0.00364964	0.00863625	0.0918872	0.169266	0.165962	0.232347	0.252629	0.308443
CDK8_CN	0.00408742	0.00364964	0.00573601	1	1	0.630792	0.675848	0.0583644	0.0982009

## Sheet: DetailPrev RE>0.5%
RE Prevalence >0.5%: Genes with prevalence more than 0.5% in any cohort
Gene	# local	# var local	% var local	# brain met	# var brain met	% var brain met	# other met	# var other met	% var other met	OR brain met vs local	pval brain met vs local	OR brain met vs other met	pval brain met vs other met	OR other met vs local	pval other met vs local
CDK12_RE	11988	103	0.00859193	822	29	0.0352798	15516	105	0.00676721	4.21975	3.54501e-09	5.36743	1.84572e-11	0.786177	0.0919448
RB1_RE	11988	117	0.00975976	822	16	0.0194647	15516	90	0.00580046	2.01412	0.0184644	3.40248	7.66771e-05	0.591958	0.00018367
ETV6_RE	11988	91	0.00759092	822	14	0.0170316	15516	65	0.00418922	2.26523	0.00800533	4.1187	3.51059e-05	0.549988	0.000246657
NOTCH1_RE	11988	97	0.00809142	822	10	0.0121655	15516	70	0.00451147	1.5097	0.229404	2.71745	0.00667532	0.555557	0.000213669
NOTCH3_RE	11988	88	0.00734067	822	9	0.0109489	15516	63	0.00406032	1.49698	0.292315	2.71534	0.00982553	0.551305	0.000368722
CREBBP_RE	11988	67	0.00558892	822	9	0.0109489	15516	53	0.00341583	1.96965	0.05997	3.22976	0.00365132	0.609846	0.00736451
NF1_RE	11988	124	0.0103437	822	9	0.0109489	15516	125	0.0080562	1.05916	0.857955	1.36304	0.322737	0.777057	0.0539168
ARID1A_RE	11988	39	0.00325325	822	6	0.00729927	15516	66	0.00425367	2.25283	0.0661213	1.72126	0.177643	1.30883	0.200305
FANCA_RE	11988	29	0.00241909	822	6	0.00729927	15516	31	0.00199794	3.0322	0.0225022	3.67291	0.00973345	0.825558	0.515108
PALB2_RE	11988	11	0.000917584	822	6	0.00729927	15516	12	0.000773395	8.00602	0.000459565	9.5	0.000175477	0.842739	0.680529
FBXW7_RE	11988	19	0.00158492	822	5	0.00608273	15516	10	0.000644496	3.85525	0.0164484	9.4896	0.000626636	0.40626	0.0231575
CTNNA1_RE	11988	24	0.002002	822	5	0.00608273	15516	18	0.00116009	3.0508	0.0353296	5.26928	0.00502432	0.578978	0.0869074
BRCA1_RE	11988	70	0.00583917	822	5	0.00608273	15516	73	0.00470482	1.04197	0.813815	1.29466	0.597076	0.804816	0.205157
BRD4_RE	11988	65	0.00542209	822	5	0.00608273	15516	72	0.00464037	1.12259	0.804273	1.31273	0.59475	0.855155	0.38804
MSH6_RE	11988	16	0.00133467	822	5	0.00608273	15516	17	0.00109564	4.57925	0.00923244	5.5796	0.00409923	0.820714	0.601234
ATR_RE	11988	18	0.0015015	822	5	0.00608273	15516	28	0.00180459	4.06977	0.0137292	3.38521	0.0234504	1.20222	0.655767
KDM5C_RE	11988	16	0.00133467	822	5	0.00608273	15516	19	0.00122454	4.57925	0.00923244	4.99163	0.0060881	0.917387	0.865159
PTEN_RE	11988	77	0.00642309	822	3	0.00364964	15516	59	0.00380253	0.566624	0.489239	0.959645	1	0.590452	0.00235297
FGFR2_RE	11988	45	0.00375375	822	3	0.00364964	15516	93	0.00599381	0.972161	1	0.607468	0.635128	1.60035	0.0096604
NOTCH2_RE	11988	159	0.0132633	822	2	0.00243309	15516	130	0.00837845	0.181454	0.00307929	0.288668	0.0690731	0.628592	0.000100105

## Sheet: FDR Detail Prev RE
CN Prevalence >0.5%: Genes with prevalence more than 0.5% in any cohort and Benjamini-Hochberg p-value
Gene	% var local	% var brain met	% var other met	pval brain met vs BC	Benjamini-Hochberg P-value BM vs BC	pval brain met vs other met	Benjamini-Hochberg P-value BM vs Other Met	pval other met vs BC	Benjamini-Hochberg P-value Other Met vs BC
CDK12_RE	0.00859193	0.0352798	0.00676721	3.54501e-09	7.09003e-08	1.84572e-11	3.69144e-10	0.0919448	0.153241
RB1_RE	0.00975976	0.0194647	0.00580046	0.0184644	0.0410319	7.66771e-05	0.000511181	0.00018367	0.00123329
ETV6_RE	0.00759092	0.0170316	0.00418922	0.00800533	0.0307748	3.51059e-05	0.000351059	0.000246657	0.00123329
NOTCH1_RE	0.00809142	0.0121655	0.00451147	0.229404	0.32772	0.00667532	0.0133506	0.000213669	0.00123329
NOTCH3_RE	0.00734067	0.0109489	0.00406032	0.292315	0.389754	0.00982553	0.0163759	0.000368722	0.00147489
CREBBP_RE	0.00558892	0.0109489	0.00341583	0.05997	0.09995	0.00365132	0.0117121	0.00736451	0.0210415
NF1_RE	0.0103437	0.0109489	0.0080562	0.857955	0.90311	0.322737	0.403422	0.0539168	0.107834
ARID1A_RE	0.00325325	0.00729927	0.00425367	0.0661213	0.101725	0.177643	0.236857	0.200305	0.293081
FANCA_RE	0.00241909	0.00729927	0.00199794	0.0225022	0.0450045	0.00973345	0.0163759	0.515108	0.643885
PALB2_RE	0.000917584	0.00729927	0.000773395	0.000459565	0.00459565	0.000175477	0.000877383	0.680529	0.716347
FBXW7_RE	0.00158492	0.00608273	0.000644496	0.0164484	0.0410319	0.000626636	0.00250654	0.0231575	0.0514611
CTNNA1_RE	0.002002	0.00608273	0.00116009	0.0353296	0.0642355	0.00502432	0.0125608	0.0869074	0.153241
BRCA1_RE	0.00583917	0.00608273	0.00470482	0.813815	0.90311	0.597076	0.663418	0.205157	0.293081
BRD4_RE	0.00542209	0.00608273	0.00464037	0.804273	0.90311	0.59475	0.663418	0.38804	0.517386
MSH6_RE	0.00133467	0.00608273	0.00109564	0.00923244	0.0307748	0.00409923	0.0117121	0.601234	0.707334
ATR_RE	0.0015015	0.00608273	0.00180459	0.0137292	0.0392264	0.0234504	0.0360775	0.655767	0.716347
KDM5C_RE	0.00133467	0.00608273	0.00122454	0.00923244	0.0307748	0.0060881	0.0133506	0.865159	0.865159
PTEN_RE	0.00642309	0.00364964	0.00380253	0.489239	0.611549	1	1	0.00235297	0.00784322
FGFR2_RE	0.00375375	0.00364964	0.00599381	1	1	0.635128	0.668556	0.0096604	0.024151
NOTCH2_RE	0.0132633	0.00243309	0.00837845	0.00307929	0.0205286	0.0690731	0.0986758	0.000100105	0.00123329
